# Supplementary material for: Global niche dynamics of two invasive Aedes mosquitoes, Aedes japonicus and Aedes koreicus (Diptera: Culicidae), using comprehensive native and non-native occurrence data
Source: Research Square preprint supplement (doi:10.21203/rs.3.rs-9381631/v1), 2026-05-21
Supplement: Supplementary file 1 [file bd5da2db190419b13e41c848.xlsx]

## Sheet: Sheet1
species	group	subpop	lat	long	reference
Aedes japonicus	Native	Korea	33.3378	126.453	Bang & Shin (Personal observation)
Aedes japonicus	Native	Korea	34.465	126.312	Bang & Shin (Personal observation)
Aedes japonicus	Native	Korea	34.7536	126.668	Bang & Shin (Personal observation)
Aedes japonicus	Native	Korea	35.3703	127.696	Bang & Shin (Personal observation)
Aedes japonicus	Native	Japan	35.6171	139.381	Bang & Shin (Personal observation)
Aedes japonicus	Native	Korea	35.8275	128.59	Bang & Shin (Personal observation)
Aedes japonicus	Native	Korea	36.7911	126.378	Bang & Shin (Personal observation)
Aedes japonicus	Native	Korea	37.3031	127.317	Bang & Shin (Personal observation)
Aedes japonicus	Native	Korea	37.3444	127.284	Bang & Shin (Personal observation)
Aedes japonicus	Native	Korea	37.4569	126.948	Bang & Shin (Personal observation)
Aedes japonicus	Native	Korea	37.5644	127.283	Bang & Shin (Personal observation)
Aedes japonicus	Native	Korea	37.7381	127.556	Bang & Shin (Personal observation)
Aedes japonicus	Native	Korea	38.1436	127.474	Bang & Shin (Personal observation)
Aedes japonicus	Native	Korea	35.2027	128.075	Bang et al. 2021. Parasites & Vectors 17:386.
Aedes japonicus	Native	Korea	37.2618	128.084	Bang et al. 2021. Parasites & Vectors 17:386.
Aedes japonicus	Native	Japan	35.49	139.52	Ejiri et al. 2009. Parasitology Resesearch 105(3): 629-633.
Aedes japonicus	Native	Japan	43.05	144.14	Ejiri et al. 2011. Journal of Medical Entomology 48(4): 904-908.
Aedes japonicus	Native	Japan	42.8167	141.65	Fonseca et al. 2001. Journal of Medical Entomology 38(2): 135-146.
Aedes japonicus	Native	Japan	42.9833	141.567	Fonseca et al. 2001. Journal of Medical Entomology 38(2): 135-146.
Aedes japonicus	Native	Japan	43.05	141.35	Fonseca et al. 2001. Journal of Medical Entomology 38(2): 135-146.
Aedes japonicus	Native	Japan	32.8218	130.73	GBIF. 2026a. GBIF Occurrence Download.
Aedes japonicus	Native	Japan	35.6484	139.271	GBIF. 2026a. GBIF Occurrence Download.
Aedes japonicus	Native	Japan	35.8236	140.269	GBIF. 2026a. GBIF Occurrence Download.
Aedes japonicus	Native	Japan	35.9636	140.14	GBIF. 2026a. GBIF Occurrence Download.
Aedes japonicus	Native	Japan	36.7674	137.469	GBIF. 2026a. GBIF Occurrence Download.
Aedes japonicus	Native	Japan	36.8231	138.208	GBIF. 2026a. GBIF Occurrence Download.
Aedes japonicus	Native	Japan	39.673	140.953	Hayakawa et al. 1990. Medical Entomology and Zoology 41(2): 121-125.
Aedes japonicus	Native	Japan	36.3564	138.636	Hirabayashi. 2020. Pestology 35(1): 5-7.
Aedes japonicus	Native	Japan	35.6408	140.481	Hoshino et al. 2010. Japanses Journal of Infectious Diseases 63(6): 401-404.
Aedes japonicus	Native	Japan	35.0167	135.767	Huber et al. 2014. Parasitological Research 133(9): 3195-3199.
Aedes japonicus	Native	Japan	32.7729	129.886	Iriarte et al. 1991. Tropical Medicine 33(3): 55-60.
Aedes japonicus	Native	Japan	32.7593	129.848	Kawada et al. 2010. Japanses Journal of Infectious Diseases 63(1): 19-24.
Aedes japonicus	Native	Japan	32.7732	129.816	Kawada et al. 2010. Japanses Journal of Infectious Diseases 63(1): 19-24.
Aedes japonicus	Native	Korea	33.3075	126.385	Kim et al. 2005. Entomological Research 35(1): 55-66.
Aedes japonicus	Native	Korea	33.3181	126.843	Kim et al. 2005. Entomological Research 35(1): 55-66.
Aedes japonicus	Native	Korea	33.3467	126.496	Kim et al. 2005. Entomological Research 35(1): 55-66.
Aedes japonicus	Native	Korea	33.3669	126.627	Kim et al. 2005. Entomological Research 35(1): 55-66.
Aedes japonicus	Native	Japan	35.3529	139.578	Kosone et al. 2005. Pestology (Pest Control Research) 20(2): 89-94.
Aedes japonicus	Native	Japan	35.3754	139.632	Kosone et al. 2005. Pestology (Pest Control Research) 20(2): 89-94.
Aedes japonicus	Native	Japan	35.4056	139.587	Kosone et al. 2005. Pestology (Pest Control Research) 20(2): 89-94.
Aedes japonicus	Native	Japan	35.4068	139.551	Kosone et al. 2005. Pestology (Pest Control Research) 20(2): 89-94.
Aedes japonicus	Native	Japan	35.4098	139.628	Kosone et al. 2005. Pestology (Pest Control Research) 20(2): 89-94.
Aedes japonicus	Native	Japan	35.4362	139.579	Kosone et al. 2005. Pestology (Pest Control Research) 20(2): 89-94.
Aedes japonicus	Native	Japan	35.4457	139.623	Kosone et al. 2005. Pestology (Pest Control Research) 20(2): 89-94.
Aedes japonicus	Native	Japan	35.4492	139.534	Kosone et al. 2005. Pestology (Pest Control Research) 20(2): 89-94.
Aedes japonicus	Native	Japan	35.4711	139.604	Kosone et al. 2005. Pestology (Pest Control Research) 20(2): 89-94.
Aedes japonicus	Native	Japan	35.5226	139.662	Kosone et al. 2005. Pestology (Pest Control Research) 20(2): 89-94.
Aedes japonicus	Native	Japan	35.5343	139.536	Kosone et al. 2005. Pestology (Pest Control Research) 20(2): 89-94.
Aedes japonicus	Native	Japan	35.5522	139.564	Kosone et al. 2005. Pestology (Pest Control Research) 20(2): 89-94.
Aedes japonicus	Native	Japan	38.0091	138.449	Maekawa 2022. Medical Entomology and Zoology 73(1): 15-23.
Aedes japonicus	Native	Japan	38.0741	138.355	Maekawa 2022. Medical Entomology and Zoology 73(1): 15-23.
Aedes japonicus	Native	Japan	31.864	130.774	Maekawa et al. 2016. Medical Entomology and Zoology 67(1): 1-12.
Aedes japonicus	Native	Japan	32.5216	130.419	Maekawa et al. 2016. Medical Entomology and Zoology 67(1): 1-12.
Aedes japonicus	Native	Japan	31.39	131.325	Maekawa et al. 2016. Medical Entomology and Zoology 67(3):183-198.
Aedes japonicus	Native	Japan	31.8976	130.834	Maekawa et al. 2016. Medical Entomology and Zoology 67(3):183-198.
Aedes japonicus	Native	Japan	32.2106	130.062	Maekawa et al. 2016. Medical Entomology and Zoology 67(3):183-198.
Aedes japonicus	Native	Japan	33.4353	132.686	Maekawa et al. 2016. Medical Entomology and Zoology 67(3):183-198.
Aedes japonicus	Native	Japan	34.1982	135.407	Maekawa et al. 2016. Medical Entomology and Zoology 67(3):183-198.
Aedes japonicus	Native	Japan	34.2822	131.292	Maekawa et al. 2016. Medical Entomology and Zoology 67(3):183-198.
Aedes japonicus	Native	Japan	34.6412	129.323	Maekawa et al. 2016. Medical Entomology and Zoology 67(3):183-198.
Aedes japonicus	Native	Japan	36.0333	137.507	Maekawa et al. 2016. Medical Entomology and Zoology 67(3):183-198.
Aedes japonicus	Native	Japan	37.455	140.052	Maekawa et al. 2016. Medical Entomology and Zoology 67(3):183-198.
Aedes japonicus	Native	Japan	40.3151	140.467	Maekawa et al. 2016. Medical Entomology and Zoology 67(3):183-198.
Aedes japonicus	Native	Japan	40.8728	140.318	Maekawa et al. 2016. Medical Entomology and Zoology 67(3):183-198.
Aedes japonicus	Native	Japan	42.6444	141.786	Maekawa et al. 2016. Medical Entomology and Zoology 67(3):183-198.
Aedes japonicus	Native	Japan	43.1594	141.507	Maekawa et al. 2016. Medical Entomology and Zoology 67(3):183-198.
Aedes japonicus	Native	Japan	34.677	133.907	Maekawa et al. 2019. Medical Entomology and Zoology 70(3): 159-165.
Aedes japonicus	Native	Japan	40.8268	140.743	Maekawa et al. 2025. Medical Entomology and Zoology 76(3): 135-143.
Aedes japonicus	Native	Japan	41.7574	140.722	Maekawa et al. 2025. Medical Entomology and Zoology 76(3): 135-143.
Aedes japonicus	Native	Japan	41.776	140.787	Maekawa et al. 2025. Medical Entomology and Zoology 76(3): 135-143.
Aedes japonicus	Native	Japan	41.7918	140.737	Maekawa et al. 2025. Medical Entomology and Zoology 76(3): 135-143.
Aedes japonicus	Native	Japan	41.8123	140.704	Maekawa et al. 2025. Medical Entomology and Zoology 76(3): 135-143.
Aedes japonicus	Native	Japan	41.8238	140.653	Maekawa et al. 2025. Medical Entomology and Zoology 76(3): 135-143.
Aedes japonicus	Native	Japan	43.0182	141.446	Maekawa et al. 2025. Medical Entomology and Zoology 76(3): 135-143.
Aedes japonicus	Native	Japan	43.0632	141.445	Maekawa et al. 2025. Medical Entomology and Zoology 76(3): 135-143.
Aedes japonicus	Native	Japan	43.1828	141.003	Maekawa et al. 2025. Medical Entomology and Zoology 76(3): 135-143.
Aedes japonicus	Native	Japan	43.2076	140.988	Maekawa et al. 2025. Medical Entomology and Zoology 76(3): 135-143.
Aedes japonicus	Native	Japan	34.3136	135.13	Mizuta. 2011. Medical Entomology and Zoology 62(3): 195-198.
Aedes japonicus	Native	Japan	30.7335	130.997	Mogi (Personal observation)
Aedes japonicus	Native	Japan	31.5995	130.543	Mogi (Personal observation)
Aedes japonicus	Native	Japan	32.7778	132.959	Mogi (Personal observation)
Aedes japonicus	Native	Japan	33.2132	129.902	Mogi (Personal observation)
Aedes japonicus	Native	Japan	33.3073	134.123	Mogi (Personal observation)
Aedes japonicus	Native	Japan	33.3256	130.215	Mogi (Personal observation)
Aedes japonicus	Native	Japan	33.3274	130.267	Mogi (Personal observation)
Aedes japonicus	Native	Japan	33.3496	130.065	Mogi (Personal observation)
Aedes japonicus	Native	Japan	33.3622	130.22	Mogi (Personal observation)
Aedes japonicus	Native	Japan	33.3675	130.399	Mogi (Personal observation)
Aedes japonicus	Native	Japan	33.401	129.818	Mogi (Personal observation)
Aedes japonicus	Native	Japan	33.4182	130.469	Mogi (Personal observation)
Aedes japonicus	Native	Japan	33.4505	129.79	Mogi (Personal observation)
Aedes japonicus	Native	Japan	33.479	129.959	Mogi (Personal observation)
Aedes japonicus	Native	Japan	33.5469	129.93	Mogi (Personal observation)
Aedes japonicus	Native	Japan	33.5858	129.841	Mogi (Personal observation)
Aedes japonicus	Native	Japan	33.5946	130.313	Mogi (Personal observation)
Aedes japonicus	Native	Japan	33.6663	130.313	Mogi (Personal observation)
Aedes japonicus	Native	Japan	35.5623	133.306	Mogi (Personal observation)
Aedes japonicus	Native	Japan	36.0733	133.028	Mogi (Personal observation)
Aedes japonicus	Native	Japan	36.2244	133.307	Mogi (Personal observation)
Aedes japonicus	Native	Japan	36.2801	133.249	Mogi (Personal observation)
Aedes japonicus	Native	Japan	36.304	133.217	Mogi (Personal observation)
Aedes japonicus	Native	Japan	37.5033	139.928	Mogi (Personal observation)
Aedes japonicus	Native	Japan	38.2822	140.866	Mogi (Personal observation)
Aedes japonicus	Native	Japan	38.9182	139.841	Mogi (Personal observation)
Aedes japonicus	Native	Japan	39.7151	141.153	Mogi (Personal observation)
Aedes japonicus	Native	Japan	40.5228	140.18	Mogi (Personal observation)
Aedes japonicus	Native	Japan	40.6478	140.848	Mogi (Personal observation)
Aedes japonicus	Native	Japan	40.8922	140.867	Mogi (Personal observation)
Aedes japonicus	Native	Japan	42.6696	143.033	Mogi (Personal observation)
Aedes japonicus	Native	Japan	42.8756	143.175	Mogi (Personal observation)
Aedes japonicus	Native	Japan	43.0746	141.515	Mogi (Personal observation)
Aedes japonicus	Native	Japan	43.4338	144.095	Mogi (Personal observation)
Aedes japonicus	Native	Japan	43.7921	142.308	Mogi (Personal observation)
Aedes japonicus	Native	Japan	44.045	144.187	Mogi (Personal observation)
Aedes japonicus	Native	Japan	36.5661	136.655	Nakazawa 2024. Medical Entomology and Zoology 75(1): 5-11.
Aedes japonicus	Native	Japan	38.2395	140.332	Nihei et al. 2014. Geospatial Health 8(2): 417.
Aedes japonicus	Native	Japan	38.2672	140.341	Nihei et al. 2014. Geospatial Health 8(2): 417.
Aedes japonicus	Native	Japan	35.7708	140.385	Niizuma et al. 2022. Medical Entomology and Zoology 73(2): 43-51.
Aedes japonicus	Native	Japan	36.9189	139.201	Niizuma et al. 2024. Medical Entomology and Zoology 75(1): 17-19
Aedes japonicus	Native	Japan	30.8355	129.956	Noda 2011. Occasional papers 51: 19-20.
Aedes japonicus	Native	Japan	39.6878	141.153	Sato et al. 2012. Medical Entomology and Zoology 63(3): 195-204.
Aedes japonicus	Native	Japan	36.0115	139.51	Sato et al. 2022. Pestology (Pest Control Research) 37(1): 1-7.
Aedes japonicus	Native	Korea	37.7583	127.169	Seok (Personal observation)
Aedes japonicus	Native	Japan	43.237	141.012	Shimooka et al. 2021. Insects 12:1056
Aedes japonicus	Native	Japan	33.2006	132.574	Shiraishi 2011. Medical Entomology and Zoology 62(2): 109-116.
Aedes japonicus	Native	Japan	33.6578	132.98	Shiraishi 2011. Medical Entomology and Zoology 62(2): 109-116.
Aedes japonicus	Native	Japan	33.7725	133.006	Shiraishi 2011. Medical Entomology and Zoology 62(2): 109-116.
Aedes japonicus	Native	Japan	33.7736	133.048	Shiraishi 2011. Medical Entomology and Zoology 62(2): 109-116.
Aedes japonicus	Native	Japan	33.79	133.129	Shiraishi 2011. Medical Entomology and Zoology 62(2): 109-116.
Aedes japonicus	Native	Japan	33.8036	132.993	Shiraishi 2011. Medical Entomology and Zoology 62(2): 109-116.
Aedes japonicus	Native	Japan	33.8175	132.807	Shiraishi 2011. Medical Entomology and Zoology 62(2): 109-116.
Aedes japonicus	Native	Japan	33.8422	132.898	Shiraishi 2011. Medical Entomology and Zoology 62(2): 109-116.
Aedes japonicus	Native	Japan	33.8475	132.797	Shiraishi 2011. Medical Entomology and Zoology 62(2): 109-116.
Aedes japonicus	Native	Japan	33.8703	132.949	Shiraishi 2011. Medical Entomology and Zoology 62(2): 109-116.
Aedes japonicus	Native	Japan	33.8717	132.833	Shiraishi 2011. Medical Entomology and Zoology 62(2): 109-116.
Aedes japonicus	Native	Japan	33.8806	132.868	Shiraishi 2011. Medical Entomology and Zoology 62(2): 109-116.
Aedes japonicus	Native	Japan	33.8997	132.826	Shiraishi 2011. Medical Entomology and Zoology 62(2): 109-116.
Aedes japonicus	Native	Japan	33.9189	132.87	Shiraishi 2011. Medical Entomology and Zoology 62(2): 109-116.
Aedes japonicus	Native	Japan	33.9447	133.279	Shiraishi 2011. Medical Entomology and Zoology 62(2): 109-116.
Aedes japonicus	Native	Japan	33.9456	132.854	Shiraishi 2011. Medical Entomology and Zoology 62(2): 109-116.
Aedes japonicus	Native	Japan	33.9844	133.547	Shiraishi 2011. Medical Entomology and Zoology 62(2): 109-116.
Aedes japonicus	Native	Japan	35.3755	139.465	Shirotani et al. 2009. Journal of the Japan Veterinary Medical Association 62(1): 73-79.
Aedes japonicus	Native	Japan	33.5552	129.882	Sota et al. 1994. Researches on Population Ecology 36: 93-104.
Aedes japonicus	Native	Japan	32.8306	131.4	Takaoka 1982. Medical Entomology and Zoology 33(1): 71-72.
Aedes japonicus	Native	Japan	33.949	134.574	Tsuda and Kim. 2023. Medical Entomology and Zoology 74(3): 113-118.
Aedes japonicus	Native	Japan	33.9588	134.645	Tsuda and Kim. 2023. Medical Entomology and Zoology 74(3): 113-118.
Aedes japonicus	Native	Japan	34.007	134.637	Tsuda and Kim. 2023. Medical Entomology and Zoology 74(3): 113-118.
Aedes japonicus	Native	Japan	35.4337	132.865	Tsuda and Kim. 2023. Medical Entomology and Zoology 74(3): 113-118.
Aedes japonicus	Native	Japan	35.4394	132.819	Tsuda and Kim. 2023. Medical Entomology and Zoology 74(3): 113-118.
Aedes japonicus	Native	Japan	36.385	137.362	Watanabe 2009. Medical Entomology and Zoology. 60(2): 147.
Aedes japonicus	Native	Japan	36.677	136.7	Watanabe et al. 2012. Medical Entomology and Zoology 63(1): 31-43
Aedes japonicus	Native	Japan	36.8265	136.774	Watanabe et al. 2012. Medical Entomology and Zoology 63(1): 31-43
Aedes japonicus	Native	Japan	36.9692	136.947	Watanabe et al. 2012. Medical Entomology and Zoology 63(1): 31-43
Aedes japonicus	Native	Japan	37.1453	136.735	Watanabe et al. 2012. Medical Entomology and Zoology 63(1): 31-43
Aedes japonicus	Native	Japan	37.1697	136.77	Watanabe et al. 2012. Medical Entomology and Zoology 63(1): 31-43
Aedes japonicus	Native	Japan	37.2909	136.738	Watanabe et al. 2012. Medical Entomology and Zoology 63(1): 31-43
Aedes japonicus	Native	Japan	37.3449	137.171	Watanabe et al. 2012. Medical Entomology and Zoology 63(1): 31-43
Aedes japonicus	Native	Japan	37.5141	137.224	Watanabe et al. 2012. Medical Entomology and Zoology 63(1): 31-43
Aedes japonicus	Native	Japan	38.835	141.585	Watanabe et al. 2012. Medical Entomology and Zoology 63(1): 31-43
Aedes japonicus	Native	Japan	38.8953	141.57	Watanabe et al. 2012. Medical Entomology and Zoology 63(1): 31-43
Aedes japonicus	Native	Japan	38.9916	141.612	Watanabe et al. 2012. Medical Entomology and Zoology 63(1): 31-43
Aedes japonicus	Native	Japan	39.0199	141.633	Watanabe et al. 2012. Medical Entomology and Zoology 63(1): 31-43
Aedes japonicus	Native	Japan	37.4456	137.292	Watanabe et al. 2024. Pestology (Pest Control Research) 39(1): 27-29.
Aedes japonicus	Native	Japan	34.68	135.161	Yamanishi 2022. Medical Entomology and Zoology 73(4): 161-166.
Aedes japonicus	Native	Japan	39.7466	141.134	Yamashita 2001. Medical Entomology and Zoology 52(supplement) 134.
Aedes japonicus	Native	Japan	33.1968	132.609	Yamauchi 2010. Medical Entomology and Zoology 61(2): 121-124.
Aedes japonicus	Native	Japan	33.2071	132.457	Yamauchi 2010. Medical Entomology and Zoology 61(2): 121-124.
Aedes japonicus	Native	Japan	36.82	137.031	Yamauchi. 2013. Pestology (Pest Control Research) 28(1): 17-20.
Aedes japonicus	Native	Japan	36.858	136.988	Yamauchi. 2013. Pestology (Pest Control Research) 28(1): 17-20.
Aedes japonicus	Native	Japan	36.9167	137.025	Yamauchi. 2013. Pestology (Pest Control Research) 28(1): 17-20.
Aedes japonicus	Native	Japan	36.9737	137.592	Yamauchi. 2013. Pestology (Pest Control Research) 28(1): 17-20.
Aedes japonicus	Non-native	America	38.8333	-77.3167	Armistead et al. 2008. Journal of the Medical Entomology 45(4): 629-637.
Aedes japonicus	Non-native	America	38.8333	-77.1167	Armistead et al. 2012. Journal of the Medical Entomology 49(6): 1318-1327.
Aedes japonicus	Non-native	Europe	45.5903	8.02978	Arnoldi et al. 2022. Acta Tropica 232: 106536.
Aedes japonicus	Non-native	Europe	44.978	8.13859	Arnoldi et al. 2022. Acta Tropica 232: 106536.
Aedes japonicus	Non-native	America	49.277	-122.915	Baharmand et al. 2020. Journal of Vector Ecology 45(2): 285-296.
Aedes japonicus	Non-native	America	49.219	-122.564	Baharmand et al. 2020. Journal of Vector Ecology 45(2): 285-296.
Aedes japonicus	Non-native	Europe	47.399	8.551	Balestrino et al. 2016. Medical and Veterinary Entomology 31(1): 64-72.
Aedes japonicus	Non-native	America	36.8451	-94.9056	Bradt et al. 2018. Journal of the American Mosquito Control Association 34(1): 380.
Aedes japonicus	Non-native	America	36.9817	-94.6191	Bradt et al. 2018. Journal of the American Mosquito Control Association 34(1): 380.
Aedes japonicus	Non-native	America	35.7596	-83.9964	Campbell et al. 2025. Journal of the American Mosqutio Control Association 41(1): 34-38.
Aedes japonicus	Non-native	America	35.6106	-83.9358	Campbell et al. 2025. Journal of the American Mosqutio Control Association 41(1): 34-38.
Aedes japonicus	Non-native	America	35.5942	-83.8421	Campbell et al. 2025. Journal of the American Mosqutio Control Association 41(1): 34-38.
Aedes japonicus	Non-native	America	35.6027	-83.7422	Campbell et al. 2025. Journal of the American Mosqutio Control Association 41(1): 34-38.
Aedes japonicus	Non-native	America	35.6603	-83.7087	Campbell et al. 2025. Journal of the American Mosqutio Control Association 41(1): 34-38.
Aedes japonicus	Non-native	America	35.6377	-83.6888	Campbell et al. 2025. Journal of the American Mosqutio Control Association 41(1): 34-38.
Aedes japonicus	Non-native	America	35.6758	-83.5426	Campbell et al. 2025. Journal of the American Mosqutio Control Association 41(1): 34-38.
Aedes japonicus	Non-native	America	35.4585	-83.5265	Campbell et al. 2025. Journal of the American Mosqutio Control Association 41(1): 34-38.
Aedes japonicus	Non-native	America	35.69	-83.4886	Campbell et al. 2025. Journal of the American Mosqutio Control Association 41(1): 34-38.
Aedes japonicus	Non-native	America	35.7199	-83.4638	Campbell et al. 2025. Journal of the American Mosqutio Control Association 41(1): 34-38.
Aedes japonicus	Non-native	America	35.6116	-83.4636	Campbell et al. 2025. Journal of the American Mosqutio Control Association 41(1): 34-38.
Aedes japonicus	Non-native	America	35.4617	-83.4254	Campbell et al. 2025. Journal of the American Mosqutio Control Association 41(1): 34-38.
Aedes japonicus	Non-native	America	35.5209	-83.3102	Campbell et al. 2025. Journal of the American Mosqutio Control Association 41(1): 34-38.
Aedes japonicus	Non-native	America	35.5527	-83.1535	Campbell et al. 2025. Journal of the American Mosqutio Control Association 41(1): 34-38.
Aedes japonicus	Non-native	America	35.7388	-83.1526	Campbell et al. 2025. Journal of the American Mosqutio Control Association 41(1): 34-38.
Aedes japonicus	Non-native	America	35.7504	-83.1098	Campbell et al. 2025. Journal of the American Mosqutio Control Association 41(1): 34-38.
Aedes japonicus	Non-native	America	35.6404	-83.0769	Campbell et al. 2025. Journal of the American Mosqutio Control Association 41(1): 34-38.
Aedes japonicus	Non-native	America	35.5863	-83.063	Campbell et al. 2025. Journal of the American Mosqutio Control Association 41(1): 34-38.
Aedes japonicus	Non-native	America	34.8177	-83.3039	Day et al. 2020. Journal of the American Mosquito Control Association 36(4): 216-220.
Aedes japonicus	Non-native	America	41.047	-73.5057	Eastwood et al. 2020. Journal of Medical Entomology 57(2): 534-541.
Aedes japonicus	Non-native	America	41.4062	-72.9063	Eastwood et al. 2020. Journal of Medical Entomology 57(2): 534-541.
Aedes japonicus	Non-native	Europe	43.3516	-5.8753	Eritja et al. 2019. Parasites & Vectors 12:53.
Aedes japonicus	Non-native	Europe	43.3831	-5.841	Eritja et al. 2019. Parasites & Vectors 12:53.
Aedes japonicus	Non-native	Europe	43.4545	-5.8171	Eritja et al. 2019. Parasites & Vectors 12:53.
Aedes japonicus	Non-native	Europe	43.381	-5.7938	Eritja et al. 2019. Parasites & Vectors 12:53.
Aedes japonicus	Non-native	Europe	43.3398	-5.7114	Eritja et al. 2019. Parasites & Vectors 12:53.
Aedes japonicus	Non-native	Europe	43.4337	-5.7092	Eritja et al. 2019. Parasites & Vectors 12:53.
Aedes japonicus	Non-native	Europe	43.408	-5.6843	Eritja et al. 2019. Parasites & Vectors 12:53.
Aedes japonicus	Non-native	Europe	43.2197	-4.05528	Eritja et al. 2021. Parasites & Vectors 14:375.
Aedes japonicus	Non-native	Europe	43.3858	-3.90298	Eritja et al. 2021. Parasites & Vectors 14:375.
Aedes japonicus	Non-native	Europe	43.3026	-2.86921	Eritja et al. 2021. Parasites & Vectors 14:375.
Aedes japonicus	Non-native	Europe	43.3208	-2.64269	Eritja et al. 2021. Parasites & Vectors 14:375.
Aedes japonicus	Non-native	Europe	43.168	-2.64147	Eritja et al. 2021. Parasites & Vectors 14:375.
Aedes japonicus	Non-native	Europe	42.9688	-2.61824	Eritja et al. 2021. Parasites & Vectors 14:375.
Aedes japonicus	Non-native	Europe	42.6612	-2.50986	Eritja et al. 2021. Parasites & Vectors 14:375.
Aedes japonicus	Non-native	Europe	43.2141	-2.40896	Eritja et al. 2021. Parasites & Vectors 14:375.
Aedes japonicus	Non-native	America	40.0667	-74.4333	Fonseca et al. 2001. Journal of Medical Entomology 38(2): 135-146.
Aedes japonicus	Non-native	America	41.4333	-73.3167	Fonseca et al. 2001. Journal of Medical Entomology 38(2): 135-146.
Aedes japonicus	Non-native	America	41.9667	-73.0333	Fonseca et al. 2001. Journal of Medical Entomology 38(2): 135-146.
Aedes japonicus	Non-native	America	41.5833	-72.6833	Fonseca et al. 2001. Journal of Medical Entomology 38(2): 135-146.
Aedes japonicus	Non-native	America	38.526	-90.5603	Gallitano et al. 2005. Journal of Vector Ecology 30(2): 347.
Aedes japonicus	Non-native	America	36.2394	-91.4467	Gaspar et al. 2012. Journal of the American Mosquito Control Association 28(1): 38-42.
Aedes japonicus	Non-native	America	35.8961	-90.6994	Gaspar et al. 2012. Journal of the American Mosquito Control Association 28(1): 38-42.
Aedes japonicus	Non-native	America	44.0129	-90.7067	Gaspar et al. 2012. Journal of the American Mosquito Control Association 28(1): 38-42.
Aedes japonicus	Non-native	America	44.1357	-90.7067	Gaspar et al. 2012. Journal of the American Mosquito Control Association 28(1): 38-42.
Aedes japonicus	Non-native	America	21.5429	-158.108	GBIF. 2026a. GBIF Occurrence Download.
Aedes japonicus	Non-native	America	21.5083	-157.986	GBIF. 2026a. GBIF Occurrence Download.
Aedes japonicus	Non-native	America	21.5517	-157.955	GBIF. 2026a. GBIF Occurrence Download.
Aedes japonicus	Non-native	America	21.332	-157.815	GBIF. 2026a. GBIF Occurrence Download.
Aedes japonicus	Non-native	America	20.7013	-156.357	GBIF. 2026a. GBIF Occurrence Download.
Aedes japonicus	Non-native	America	20.2324	-155.812	GBIF. 2026a. GBIF Occurrence Download.
Aedes japonicus	Non-native	America	19.0853	-155.776	GBIF. 2026a. GBIF Occurrence Download.
Aedes japonicus	Non-native	America	20.0269	-155.707	GBIF. 2026a. GBIF Occurrence Download.
Aedes japonicus	Non-native	America	20.029	-155.671	GBIF. 2026a. GBIF Occurrence Download.
Aedes japonicus	Non-native	America	20.0374	-155.638	GBIF. 2026a. GBIF Occurrence Download.
Aedes japonicus	Non-native	America	20.091	-155.582	GBIF. 2026a. GBIF Occurrence Download.
Aedes japonicus	Non-native	America	20.0654	-155.569	GBIF. 2026a. GBIF Occurrence Download.
Aedes japonicus	Non-native	America	19.5786	-155.322	GBIF. 2026a. GBIF Occurrence Download.
Aedes japonicus	Non-native	America	19.4395	-155.302	GBIF. 2026a. GBIF Occurrence Download.
Aedes japonicus	Non-native	America	19.5533	-155.286	GBIF. 2026a. GBIF Occurrence Download.
Aedes japonicus	Non-native	America	19.5602	-155.25	GBIF. 2026a. GBIF Occurrence Download.
Aedes japonicus	Non-native	America	19.7179	-155.094	GBIF. 2026a. GBIF Occurrence Download.
Aedes japonicus	Non-native	America	48.4741	-123.369	GBIF. 2026a. GBIF Occurrence Download.
Aedes japonicus	Non-native	America	48.4509	-123.34	GBIF. 2026a. GBIF Occurrence Download.
Aedes japonicus	Non-native	America	48.8706	-123.293	GBIF. 2026a. GBIF Occurrence Download.
Aedes japonicus	Non-native	America	47.0522	-122.921	GBIF. 2026a. GBIF Occurrence Download.
Aedes japonicus	Non-native	America	47.486	-122.546	GBIF. 2026a. GBIF Occurrence Download.
Aedes japonicus	Non-native	America	45.4855	-122.51	GBIF. 2026a. GBIF Occurrence Download.
Aedes japonicus	Non-native	America	48.7817	-122.419	GBIF. 2026a. GBIF Occurrence Download.
Aedes japonicus	Non-native	America	45.746	-122.314	GBIF. 2026a. GBIF Occurrence Download.
Aedes japonicus	Non-native	America	47.1792	-122.248	GBIF. 2026a. GBIF Occurrence Download.
Aedes japonicus	Non-native	America	49.0576	-122.221	GBIF. 2026a. GBIF Occurrence Download.
Aedes japonicus	Non-native	America	47.53	-122.051	GBIF. 2026a. GBIF Occurrence Download.
Aedes japonicus	Non-native	America	48.083	-121.969	GBIF. 2026a. GBIF Occurrence Download.
Aedes japonicus	Non-native	America	29.4292	-98.4959	GBIF. 2026a. GBIF Occurrence Download.
Aedes japonicus	Non-native	America	40.1371	-97.1824	GBIF. 2026a. GBIF Occurrence Download.
Aedes japonicus	Non-native	America	42.54	-96.47	GBIF. 2026a. GBIF Occurrence Download.
Aedes japonicus	Non-native	America	42.43	-96.35	GBIF. 2026a. GBIF Occurrence Download.
Aedes japonicus	Non-native	America	42.29	-96.34	GBIF. 2026a. GBIF Occurrence Download.
Aedes japonicus	Non-native	America	41.21	-95.86	GBIF. 2026a. GBIF Occurrence Download.
Aedes japonicus	Non-native	America	43.43	-95.12	GBIF. 2026a. GBIF Occurrence Download.
Aedes japonicus	Non-native	America	39.3269	-94.9357	GBIF. 2026a. GBIF Occurrence Download.
Aedes japonicus	Non-native	America	36.2843	-94.0825	GBIF. 2026a. GBIF Occurrence Download.
Aedes japonicus	Non-native	America	36.6583	-94.072	GBIF. 2026a. GBIF Occurrence Download.
Aedes japonicus	Non-native	America	47.1881	-93.8423	GBIF. 2026a. GBIF Occurrence Download.
Aedes japonicus	Non-native	America	48.1953	-93.8064	GBIF. 2026a. GBIF Occurrence Download.
Aedes japonicus	Non-native	America	41.78	-93.78	GBIF. 2026a. GBIF Occurrence Download.
Aedes japonicus	Non-native	America	41.5832	-93.6839	GBIF. 2026a. GBIF Occurrence Download.
Aedes japonicus	Non-native	America	41.64	-93.67	GBIF. 2026a. GBIF Occurrence Download.
Aedes japonicus	Non-native	America	42.03	-93.66	GBIF. 2026a. GBIF Occurrence Download.
Aedes japonicus	Non-native	America	44.6068	-93.6512	GBIF. 2026a. GBIF Occurrence Download.
Aedes japonicus	Non-native	America	41.61	-93.61	GBIF. 2026a. GBIF Occurrence Download.
Aedes japonicus	Non-native	America	42.03	-93.61	GBIF. 2026a. GBIF Occurrence Download.
Aedes japonicus	Non-native	America	42.08	-93.61	GBIF. 2026a. GBIF Occurrence Download.
Aedes japonicus	Non-native	America	41.67	-93.61	GBIF. 2026a. GBIF Occurrence Download.
Aedes japonicus	Non-native	America	42.11	-93.59	GBIF. 2026a. GBIF Occurrence Download.
Aedes japonicus	Non-native	America	41.54	-93.58	GBIF. 2026a. GBIF Occurrence Download.
Aedes japonicus	Non-native	America	41.69	-93.58	GBIF. 2026a. GBIF Occurrence Download.
Aedes japonicus	Non-native	America	41.64	-93.54	GBIF. 2026a. GBIF Occurrence Download.
Aedes japonicus	Non-native	America	44.898	-93.5057	GBIF. 2026a. GBIF Occurrence Download.
Aedes japonicus	Non-native	America	41.55	-93.47	GBIF. 2026a. GBIF Occurrence Download.
Aedes japonicus	Non-native	America	44.7314	-93.4368	GBIF. 2026a. GBIF Occurrence Download.
Aedes japonicus	Non-native	America	44.8876	-93.4067	GBIF. 2026a. GBIF Occurrence Download.
Aedes japonicus	Non-native	America	44.7264	-93.3818	GBIF. 2026a. GBIF Occurrence Download.
Aedes japonicus	Non-native	America	44.8986	-93.3656	GBIF. 2026a. GBIF Occurrence Download.
Aedes japonicus	Non-native	America	44.9361	-93.2811	GBIF. 2026a. GBIF Occurrence Download.
Aedes japonicus	Non-native	America	45.2234	-93.2751	GBIF. 2026a. GBIF Occurrence Download.
Aedes japonicus	Non-native	America	45.1183	-93.2688	GBIF. 2026a. GBIF Occurrence Download.
Aedes japonicus	Non-native	America	44.9429	-93.1947	GBIF. 2026a. GBIF Occurrence Download.
Aedes japonicus	Non-native	America	44.9877	-93.1856	GBIF. 2026a. GBIF Occurrence Download.
Aedes japonicus	Non-native	America	45.0328	-93.1785	GBIF. 2026a. GBIF Occurrence Download.
Aedes japonicus	Non-native	America	45.0434	-93.1356	GBIF. 2026a. GBIF Occurrence Download.
Aedes japonicus	Non-native	America	41.33	-93.12	GBIF. 2026a. GBIF Occurrence Download.
Aedes japonicus	Non-native	America	45.0148	-93.0967	GBIF. 2026a. GBIF Occurrence Download.
Aedes japonicus	Non-native	America	34.5109	-93.076	GBIF. 2026a. GBIF Occurrence Download.
Aedes japonicus	Non-native	America	42.53	-92.44	GBIF. 2026a. GBIF Occurrence Download.
Aedes japonicus	Non-native	America	42.46	-92.31	GBIF. 2026a. GBIF Occurrence Download.
Aedes japonicus	Non-native	America	42.3084	-92.192	GBIF. 2026a. GBIF Occurrence Download.
Aedes japonicus	Non-native	America	41.01	-92.01	GBIF. 2026a. GBIF Occurrence Download.
Aedes japonicus	Non-native	America	47.9897	-91.969	GBIF. 2026a. GBIF Occurrence Download.
Aedes japonicus	Non-native	America	41.01	-91.95	GBIF. 2026a. GBIF Occurrence Download.
Aedes japonicus	Non-native	America	43.2983	-91.8004	GBIF. 2026a. GBIF Occurrence Download.
Aedes japonicus	Non-native	America	42.07	-91.74	GBIF. 2026a. GBIF Occurrence Download.
Aedes japonicus	Non-native	America	42.01	-91.71	GBIF. 2026a. GBIF Occurrence Download.
Aedes japonicus	Non-native	America	42.019	-91.6425	GBIF. 2026a. GBIF Occurrence Download.
Aedes japonicus	Non-native	America	41.99	-91.63	GBIF. 2026a. GBIF Occurrence Download.
Aedes japonicus	Non-native	America	40.97	-91.56	GBIF. 2026a. GBIF Occurrence Download.
Aedes japonicus	Non-native	America	40.63	-91.36	GBIF. 2026a. GBIF Occurrence Download.
Aedes japonicus	Non-native	America	43.8128	-91.2099	GBIF. 2026a. GBIF Occurrence Download.
Aedes japonicus	Non-native	America	42.51	-90.73	GBIF. 2026a. GBIF Occurrence Download.
Aedes japonicus	Non-native	America	41.52	-90.69	GBIF. 2026a. GBIF Occurrence Download.
Aedes japonicus	Non-native	America	42.47	-90.66	GBIF. 2026a. GBIF Occurrence Download.
Aedes japonicus	Non-native	America	42.53	-90.65	GBIF. 2026a. GBIF Occurrence Download.
Aedes japonicus	Non-native	America	42.4059	-90.6378	GBIF. 2026a. GBIF Occurrence Download.
Aedes japonicus	Non-native	America	41.49	-90.63	GBIF. 2026a. GBIF Occurrence Download.
Aedes japonicus	Non-native	America	41.54	-90.53	GBIF. 2026a. GBIF Occurrence Download.
Aedes japonicus	Non-native	America	38.4639	-90.2906	GBIF. 2026a. GBIF Occurrence Download.
Aedes japonicus	Non-native	America	44.6511	-90.1858	GBIF. 2026a. GBIF Occurrence Download.
Aedes japonicus	Non-native	America	32.3368	-90.0089	GBIF. 2026a. GBIF Occurrence Download.
Aedes japonicus	Non-native	America	38.7222	-89.9207	GBIF. 2026a. GBIF Occurrence Download.
Aedes japonicus	Non-native	America	33.7733	-89.9068	GBIF. 2026a. GBIF Occurrence Download.
Aedes japonicus	Non-native	America	33.7392	-89.8691	GBIF. 2026a. GBIF Occurrence Download.
Aedes japonicus	Non-native	America	31.8797	-89.7395	GBIF. 2026a. GBIF Occurrence Download.
Aedes japonicus	Non-native	America	43.2781	-89.7183	GBIF. 2026a. GBIF Occurrence Download.
Aedes japonicus	Non-native	America	43.114	-89.647	GBIF. 2026a. GBIF Occurrence Download.
Aedes japonicus	Non-native	America	37.98	-89.5962	GBIF. 2026a. GBIF Occurrence Download.
Aedes japonicus	Non-native	America	48.0247	-89.5425	GBIF. 2026a. GBIF Occurrence Download.
Aedes japonicus	Non-native	America	43.0569	-89.4208	GBIF. 2026a. GBIF Occurrence Download.
Aedes japonicus	Non-native	America	43.1142	-89.3157	GBIF. 2026a. GBIF Occurrence Download.
Aedes japonicus	Non-native	America	42.8257	-89.3123	GBIF. 2026a. GBIF Occurrence Download.
Aedes japonicus	Non-native	America	40.5364	-89.0168	GBIF. 2026a. GBIF Occurrence Download.
Aedes japonicus	Non-native	America	34.1917	-88.9803	GBIF. 2026a. GBIF Occurrence Download.
Aedes japonicus	Non-native	America	43.4057	-88.7059	GBIF. 2026a. GBIF Occurrence Download.
Aedes japonicus	Non-native	America	45.2653	-88.6415	GBIF. 2026a. GBIF Occurrence Download.
Aedes japonicus	Non-native	America	47.1175	-88.5623	GBIF. 2026a. GBIF Occurrence Download.
Aedes japonicus	Non-native	America	47.2874	-88.405	GBIF. 2026a. GBIF Occurrence Download.
Aedes japonicus	Non-native	America	42.3986	-88.3526	GBIF. 2026a. GBIF Occurrence Download.
Aedes japonicus	Non-native	America	42.1119	-88.2704	GBIF. 2026a. GBIF Occurrence Download.
Aedes japonicus	Non-native	America	40.08	-88.22	GBIF. 2026a. GBIF Occurrence Download.
Aedes japonicus	Non-native	America	41.8441	-88.1929	GBIF. 2026a. GBIF Occurrence Download.
Aedes japonicus	Non-native	America	41.9642	-88.1438	GBIF. 2026a. GBIF Occurrence Download.
Aedes japonicus	Non-native	America	42.6014	-88.1036	GBIF. 2026a. GBIF Occurrence Download.
Aedes japonicus	Non-native	America	38.7407	-88.0938	GBIF. 2026a. GBIF Occurrence Download.
Aedes japonicus	Non-native	America	42.0184	-87.9981	GBIF. 2026a. GBIF Occurrence Download.
Aedes japonicus	Non-native	America	41.5445	-87.9844	GBIF. 2026a. GBIF Occurrence Download.
Aedes japonicus	Non-native	America	41.8871	-87.9062	GBIF. 2026a. GBIF Occurrence Download.
Aedes japonicus	Non-native	America	41.7855	-87.897	GBIF. 2026a. GBIF Occurrence Download.
Aedes japonicus	Non-native	America	41.8238	-87.8939	GBIF. 2026a. GBIF Occurrence Download.
Aedes japonicus	Non-native	America	41.7397	-87.8851	GBIF. 2026a. GBIF Occurrence Download.
Aedes japonicus	Non-native	America	43.3872	-87.8756	GBIF. 2026a. GBIF Occurrence Download.
Aedes japonicus	Non-native	America	41.8692	-87.866	GBIF. 2026a. GBIF Occurrence Download.
Aedes japonicus	Non-native	America	41.8963	-87.8656	GBIF. 2026a. GBIF Occurrence Download.
Aedes japonicus	Non-native	America	42.3675	-87.8639	GBIF. 2026a. GBIF Occurrence Download.
Aedes japonicus	Non-native	America	41.7682	-87.8548	GBIF. 2026a. GBIF Occurrence Download.
Aedes japonicus	Non-native	America	41.4709	-87.8491	GBIF. 2026a. GBIF Occurrence Download.
Aedes japonicus	Non-native	America	41.8308	-87.8399	GBIF. 2026a. GBIF Occurrence Download.
Aedes japonicus	Non-native	America	41.8607	-87.8307	GBIF. 2026a. GBIF Occurrence Download.
Aedes japonicus	Non-native	America	41.8933	-87.8264	GBIF. 2026a. GBIF Occurrence Download.
Aedes japonicus	Non-native	America	41.7374	-87.8194	GBIF. 2026a. GBIF Occurrence Download.
Aedes japonicus	Non-native	America	41.7839	-87.8034	GBIF. 2026a. GBIF Occurrence Download.
Aedes japonicus	Non-native	America	41.9053	-87.7917	GBIF. 2026a. GBIF Occurrence Download.
Aedes japonicus	Non-native	America	41.8713	-87.7885	GBIF. 2026a. GBIF Occurrence Download.
Aedes japonicus	Non-native	America	42.0652	-87.7746	GBIF. 2026a. GBIF Occurrence Download.
Aedes japonicus	Non-native	America	41.9572	-87.7193	GBIF. 2026a. GBIF Occurrence Download.
Aedes japonicus	Non-native	America	41.986	-87.7192	GBIF. 2026a. GBIF Occurrence Download.
Aedes japonicus	Non-native	America	39.3851	-87.6949	GBIF. 2026a. GBIF Occurrence Download.
Aedes japonicus	Non-native	America	39.6192	-87.666	GBIF. 2026a. GBIF Occurrence Download.
Aedes japonicus	Non-native	America	33.2091	-87.4555	GBIF. 2026a. GBIF Occurrence Download.
Aedes japonicus	Non-native	America	41.4409	-87.3963	GBIF. 2026a. GBIF Occurrence Download.
Aedes japonicus	Non-native	America	41.5816	-87.2145	GBIF. 2026a. GBIF Occurrence Download.
Aedes japonicus	Non-native	America	41.4696	-87.2016	GBIF. 2026a. GBIF Occurrence Download.
Aedes japonicus	Non-native	America	41.5243	-87.0816	GBIF. 2026a. GBIF Occurrence Download.
Aedes japonicus	Non-native	America	40.3916	-86.8771	GBIF. 2026a. GBIF Occurrence Download.
Aedes japonicus	Non-native	America	41.5938	-86.7377	GBIF. 2026a. GBIF Occurrence Download.
Aedes japonicus	Non-native	America	35.2373	-86.7105	GBIF. 2026a. GBIF Occurrence Download.
Aedes japonicus	Non-native	America	34.0416	-86.4087	GBIF. 2026a. GBIF Occurrence Download.
Aedes japonicus	Non-native	America	39.8735	-86.3226	GBIF. 2026a. GBIF Occurrence Download.
Aedes japonicus	Non-native	America	39.739	-86.313	GBIF. 2026a. GBIF Occurrence Download.
Aedes japonicus	Non-native	America	39.8014	-86.3102	GBIF. 2026a. GBIF Occurrence Download.
Aedes japonicus	Non-native	America	48.593	-86.3	GBIF. 2026a. GBIF Occurrence Download.
Aedes japonicus	Non-native	America	41.9605	-86.253	GBIF. 2026a. GBIF Occurrence Download.
Aedes japonicus	Non-native	America	39.7747	-86.2482	GBIF. 2026a. GBIF Occurrence Download.
Aedes japonicus	Non-native	America	41.6908	-86.2451	GBIF. 2026a. GBIF Occurrence Download.
Aedes japonicus	Non-native	America	44.4947	-86.2343	GBIF. 2026a. GBIF Occurrence Download.
Aedes japonicus	Non-native	America	39.7036	-86.2335	GBIF. 2026a. GBIF Occurrence Download.
Aedes japonicus	Non-native	America	39.9689	-86.2115	GBIF. 2026a. GBIF Occurrence Download.
Aedes japonicus	Non-native	America	39.6394	-86.1991	GBIF. 2026a. GBIF Occurrence Download.
Aedes japonicus	Non-native	America	39.7309	-86.196	GBIF. 2026a. GBIF Occurrence Download.
Aedes japonicus	Non-native	America	39.8503	-86.1797	GBIF. 2026a. GBIF Occurrence Download.
Aedes japonicus	Non-native	America	39.7904	-86.1772	GBIF. 2026a. GBIF Occurrence Download.
Aedes japonicus	Non-native	America	39.7045	-86.1736	GBIF. 2026a. GBIF Occurrence Download.
Aedes japonicus	Non-native	America	39.6832	-86.149	GBIF. 2026a. GBIF Occurrence Download.
Aedes japonicus	Non-native	America	39.6601	-86.1282	GBIF. 2026a. GBIF Occurrence Download.
Aedes japonicus	Non-native	America	39.9012	-86.125	GBIF. 2026a. GBIF Occurrence Download.
Aedes japonicus	Non-native	America	39.8428	-86.1138	GBIF. 2026a. GBIF Occurrence Download.
Aedes japonicus	Non-native	America	39.7157	-86.1128	GBIF. 2026a. GBIF Occurrence Download.
Aedes japonicus	Non-native	America	39.6892	-86.0913	GBIF. 2026a. GBIF Occurrence Download.
Aedes japonicus	Non-native	America	39.8949	-86.0908	GBIF. 2026a. GBIF Occurrence Download.
Aedes japonicus	Non-native	America	39.715	-86.0745	GBIF. 2026a. GBIF Occurrence Download.
Aedes japonicus	Non-native	America	39.81	-86.0697	GBIF. 2026a. GBIF Occurrence Download.
Aedes japonicus	Non-native	America	39.8885	-86.0539	GBIF. 2026a. GBIF Occurrence Download.
Aedes japonicus	Non-native	America	39.756	-86.053	GBIF. 2026a. GBIF Occurrence Download.
Aedes japonicus	Non-native	America	31.8849	-86.0306	GBIF. 2026a. GBIF Occurrence Download.
Aedes japonicus	Non-native	America	39.6672	-85.9932	GBIF. 2026a. GBIF Occurrence Download.
Aedes japonicus	Non-native	America	39.8411	-85.9929	GBIF. 2026a. GBIF Occurrence Download.
Aedes japonicus	Non-native	America	39.8913	-85.9878	GBIF. 2026a. GBIF Occurrence Download.
Aedes japonicus	Non-native	America	39.736	-85.9762	GBIF. 2026a. GBIF Occurrence Download.
Aedes japonicus	Non-native	America	39.6867	-85.9596	GBIF. 2026a. GBIF Occurrence Download.
Aedes japonicus	Non-native	America	38.1044	-85.8354	GBIF. 2026a. GBIF Occurrence Download.
Aedes japonicus	Non-native	America	44.8473	-85.7947	GBIF. 2026a. GBIF Occurrence Download.
Aedes japonicus	Non-native	America	42.9618	-85.7717	GBIF. 2026a. GBIF Occurrence Download.
Aedes japonicus	Non-native	America	42.8166	-85.727	GBIF. 2026a. GBIF Occurrence Download.
Aedes japonicus	Non-native	America	32.5524	-85.7043	GBIF. 2026a. GBIF Occurrence Download.
Aedes japonicus	Non-native	America	39.0317	-85.7	GBIF. 2026a. GBIF Occurrence Download.
Aedes japonicus	Non-native	America	40.1053	-85.6803	GBIF. 2026a. GBIF Occurrence Download.
Aedes japonicus	Non-native	America	42.2837	-85.6103	GBIF. 2026a. GBIF Occurrence Download.
Aedes japonicus	Non-native	America	43.4463	-85.3593	GBIF. 2026a. GBIF Occurrence Download.
Aedes japonicus	Non-native	America	42.28	-85.1303	GBIF. 2026a. GBIF Occurrence Download.
Aedes japonicus	Non-native	America	45.1918	-85.1186	GBIF. 2026a. GBIF Occurrence Download.
Aedes japonicus	Non-native	America	35.1283	-85.0403	GBIF. 2026a. GBIF Occurrence Download.
Aedes japonicus	Non-native	America	39.7991	-84.9626	GBIF. 2026a. GBIF Occurrence Download.
Aedes japonicus	Non-native	America	45.3702	-84.9564	GBIF. 2026a. GBIF Occurrence Download.
Aedes japonicus	Non-native	America	35.1016	-84.9317	GBIF. 2026a. GBIF Occurrence Download.
Aedes japonicus	Non-native	America	33.2148	-84.9229	GBIF. 2026a. GBIF Occurrence Download.
Aedes japonicus	Non-native	America	37.3203	-84.8966	GBIF. 2026a. GBIF Occurrence Download.
Aedes japonicus	Non-native	America	42.2477	-84.7429	GBIF. 2026a. GBIF Occurrence Download.
Aedes japonicus	Non-native	America	39.512	-84.7358	GBIF. 2026a. GBIF Occurrence Download.
Aedes japonicus	Non-native	America	39.1625	-84.6742	GBIF. 2026a. GBIF Occurrence Download.
Aedes japonicus	Non-native	America	40.1728	-84.6178	GBIF. 2026a. GBIF Occurrence Download.
Aedes japonicus	Non-native	America	33.961	-84.5943	GBIF. 2026a. GBIF Occurrence Download.
Aedes japonicus	Non-native	America	35.9287	-84.5806	GBIF. 2026a. GBIF Occurrence Download.
Aedes japonicus	Non-native	America	37.0873	-84.5735	GBIF. 2026a. GBIF Occurrence Download.
Aedes japonicus	Non-native	America	39.1921	-84.5553	GBIF. 2026a. GBIF Occurrence Download.
Aedes japonicus	Non-native	America	39.2309	-84.5294	GBIF. 2026a. GBIF Occurrence Download.
Aedes japonicus	Non-native	America	49.2501	-84.4998	GBIF. 2026a. GBIF Occurrence Download.
Aedes japonicus	Non-native	America	39.0082	-84.4994	GBIF. 2026a. GBIF Occurrence Download.
Aedes japonicus	Non-native	America	38.9149	-84.4939	GBIF. 2026a. GBIF Occurrence Download.
Aedes japonicus	Non-native	America	34.2368	-84.4908	GBIF. 2026a. GBIF Occurrence Download.
Aedes japonicus	Non-native	America	34.0969	-84.4899	GBIF. 2026a. GBIF Occurrence Download.
Aedes japonicus	Non-native	America	42.7302	-84.4762	GBIF. 2026a. GBIF Occurrence Download.
Aedes japonicus	Non-native	America	39.3925	-84.4445	GBIF. 2026a. GBIF Occurrence Download.
Aedes japonicus	Non-native	America	42.6924	-84.4383	GBIF. 2026a. GBIF Occurrence Download.
Aedes japonicus	Non-native	America	35.9238	-84.4316	GBIF. 2026a. GBIF Occurrence Download.
Aedes japonicus	Non-native	America	34.1397	-84.4193	GBIF. 2026a. GBIF Occurrence Download.
Aedes japonicus	Non-native	America	43.6753	-84.3676	GBIF. 2026a. GBIF Occurrence Download.
Aedes japonicus	Non-native	America	37.5237	-84.3356	GBIF. 2026a. GBIF Occurrence Download.
Aedes japonicus	Non-native	America	46.519	-84.3268	GBIF. 2026a. GBIF Occurrence Download.
Aedes japonicus	Non-native	America	35.3128	-84.3169	GBIF. 2026a. GBIF Occurrence Download.
Aedes japonicus	Non-native	America	37.5699	-84.2966	GBIF. 2026a. GBIF Occurrence Download.
Aedes japonicus	Non-native	America	36.0629	-84.285	GBIF. 2026a. GBIF Occurrence Download.
Aedes japonicus	Non-native	America	39.8641	-84.2665	GBIF. 2026a. GBIF Occurrence Download.
Aedes japonicus	Non-native	America	35.3438	-84.2307	GBIF. 2026a. GBIF Occurrence Download.
Aedes japonicus	Non-native	America	39.7435	-84.1984	GBIF. 2026a. GBIF Occurrence Download.
Aedes japonicus	Non-native	America	46.4829	-84.0755	GBIF. 2026a. GBIF Occurrence Download.
Aedes japonicus	Non-native	America	40.7582	-84.0619	GBIF. 2026a. GBIF Occurrence Download.
Aedes japonicus	Non-native	America	36.0004	-84.0197	GBIF. 2026a. GBIF Occurrence Download.
Aedes japonicus	Non-native	America	34.0461	-84.0099	GBIF. 2026a. GBIF Occurrence Download.
Aedes japonicus	Non-native	America	42.4648	-84.0017	GBIF. 2026a. GBIF Occurrence Download.
Aedes japonicus	Non-native	America	42.0198	-83.9811	GBIF. 2026a. GBIF Occurrence Download.
Aedes japonicus	Non-native	America	39.6777	-83.9327	GBIF. 2026a. GBIF Occurrence Download.
Aedes japonicus	Non-native	America	34.9727	-83.9051	GBIF. 2026a. GBIF Occurrence Download.
Aedes japonicus	Non-native	America	36.1818	-83.8742	GBIF. 2026a. GBIF Occurrence Download.
Aedes japonicus	Non-native	America	41.4847	-83.8574	GBIF. 2026a. GBIF Occurrence Download.
Aedes japonicus	Non-native	America	41.5743	-83.8537	GBIF. 2026a. GBIF Occurrence Download.
Aedes japonicus	Non-native	America	41.5434	-83.8405	GBIF. 2026a. GBIF Occurrence Download.
Aedes japonicus	Non-native	America	41.6229	-83.8355	GBIF. 2026a. GBIF Occurrence Download.
Aedes japonicus	Non-native	America	41.4456	-83.7993	GBIF. 2026a. GBIF Occurrence Download.
Aedes japonicus	Non-native	America	41.5692	-83.7923	GBIF. 2026a. GBIF Occurrence Download.
Aedes japonicus	Non-native	America	41.53	-83.77	GBIF. 2026a. GBIF Occurrence Download.
Aedes japonicus	Non-native	America	42.2773	-83.7679	GBIF. 2026a. GBIF Occurrence Download.
Aedes japonicus	Non-native	America	41.6374	-83.7625	GBIF. 2026a. GBIF Occurrence Download.
Aedes japonicus	Non-native	America	41.667	-83.7593	GBIF. 2026a. GBIF Occurrence Download.
Aedes japonicus	Non-native	America	42.7267	-83.7497	GBIF. 2026a. GBIF Occurrence Download.
Aedes japonicus	Non-native	America	41.5032	-83.7232	GBIF. 2026a. GBIF Occurrence Download.
Aedes japonicus	Non-native	America	41.5802	-83.7217	GBIF. 2026a. GBIF Occurrence Download.
Aedes japonicus	Non-native	America	41.6184	-83.7212	GBIF. 2026a. GBIF Occurrence Download.
Aedes japonicus	Non-native	America	41.7196	-83.7207	GBIF. 2026a. GBIF Occurrence Download.
Aedes japonicus	Non-native	America	42.2921	-83.7171	GBIF. 2026a. GBIF Occurrence Download.
Aedes japonicus	Non-native	America	42.2401	-83.709	GBIF. 2026a. GBIF Occurrence Download.
Aedes japonicus	Non-native	America	42.2002	-83.7059	GBIF. 2026a. GBIF Occurrence Download.
Aedes japonicus	Non-native	America	41.6731	-83.7044	GBIF. 2026a. GBIF Occurrence Download.
Aedes japonicus	Non-native	America	42.5207	-83.6986	GBIF. 2026a. GBIF Occurrence Download.
Aedes japonicus	Non-native	America	41.6444	-83.6707	GBIF. 2026a. GBIF Occurrence Download.
Aedes japonicus	Non-native	America	41.69	-83.67	GBIF. 2026a. GBIF Occurrence Download.
Aedes japonicus	Non-native	America	41.617	-83.6532	GBIF. 2026a. GBIF Occurrence Download.
Aedes japonicus	Non-native	America	41.6535	-83.6298	GBIF. 2026a. GBIF Occurrence Download.
Aedes japonicus	Non-native	America	41.5829	-83.6297	GBIF. 2026a. GBIF Occurrence Download.
Aedes japonicus	Non-native	America	41.6941	-83.6281	GBIF. 2026a. GBIF Occurrence Download.
Aedes japonicus	Non-native	America	41.6699	-83.5956	GBIF. 2026a. GBIF Occurrence Download.
Aedes japonicus	Non-native	America	41.6159	-83.5939	GBIF. 2026a. GBIF Occurrence Download.
Aedes japonicus	Non-native	America	41.7237	-83.5898	GBIF. 2026a. GBIF Occurrence Download.
Aedes japonicus	Non-native	America	41.7225	-83.5522	GBIF. 2026a. GBIF Occurrence Download.
Aedes japonicus	Non-native	America	41.6543	-83.5512	GBIF. 2026a. GBIF Occurrence Download.
Aedes japonicus	Non-native	America	41.6919	-83.5433	GBIF. 2026a. GBIF Occurrence Download.
Aedes japonicus	Non-native	America	41.7156	-83.5141	GBIF. 2026a. GBIF Occurrence Download.
Aedes japonicus	Non-native	America	41.6818	-83.5013	GBIF. 2026a. GBIF Occurrence Download.
Aedes japonicus	Non-native	America	41.6186	-83.4938	GBIF. 2026a. GBIF Occurrence Download.
Aedes japonicus	Non-native	America	41.7048	-83.4808	GBIF. 2026a. GBIF Occurrence Download.
Aedes japonicus	Non-native	America	41.6631	-83.4708	GBIF. 2026a. GBIF Occurrence Download.
Aedes japonicus	Non-native	America	41.64	-83.44	GBIF. 2026a. GBIF Occurrence Download.
Aedes japonicus	Non-native	America	41.4311	-83.4314	GBIF. 2026a. GBIF Occurrence Download.
Aedes japonicus	Non-native	America	35.7393	-83.4221	GBIF. 2026a. GBIF Occurrence Download.
Aedes japonicus	Non-native	America	41.6756	-83.3911	GBIF. 2026a. GBIF Occurrence Download.
Aedes japonicus	Non-native	America	35.366	-83.3874	GBIF. 2026a. GBIF Occurrence Download.
Aedes japonicus	Non-native	America	42.5463	-83.3664	GBIF. 2026a. GBIF Occurrence Download.
Aedes japonicus	Non-native	America	41.3555	-83.3647	GBIF. 2026a. GBIF Occurrence Download.
Aedes japonicus	Non-native	America	33.9502	-83.3564	GBIF. 2026a. GBIF Occurrence Download.
Aedes japonicus	Non-native	America	33.9118	-83.3504	GBIF. 2026a. GBIF Occurrence Download.
Aedes japonicus	Non-native	America	41.67	-83.34	GBIF. 2026a. GBIF Occurrence Download.
Aedes japonicus	Non-native	America	41.4028	-83.3115	GBIF. 2026a. GBIF Occurrence Download.
Aedes japonicus	Non-native	America	42.3883	-83.2891	GBIF. 2026a. GBIF Occurrence Download.
Aedes japonicus	Non-native	America	39.8806	-83.2864	GBIF. 2026a. GBIF Occurrence Download.
Aedes japonicus	Non-native	America	40.1029	-83.2756	GBIF. 2026a. GBIF Occurrence Download.
Aedes japonicus	Non-native	America	33.9949	-83.2489	GBIF. 2026a. GBIF Occurrence Download.
Aedes japonicus	Non-native	America	40.0218	-83.2396	GBIF. 2026a. GBIF Occurrence Download.
Aedes japonicus	Non-native	America	42.6795	-83.2096	GBIF. 2026a. GBIF Occurrence Download.
Aedes japonicus	Non-native	America	35.3067	-83.2019	GBIF. 2026a. GBIF Occurrence Download.
Aedes japonicus	Non-native	America	35.0534	-83.1892	GBIF. 2026a. GBIF Occurrence Download.
Aedes japonicus	Non-native	America	40.0365	-83.172	GBIF. 2026a. GBIF Occurrence Download.
Aedes japonicus	Non-native	America	39.9263	-83.1708	GBIF. 2026a. GBIF Occurrence Download.
Aedes japonicus	Non-native	America	40.108	-83.1626	GBIF. 2026a. GBIF Occurrence Download.
Aedes japonicus	Non-native	America	39.8826	-83.159	GBIF. 2026a. GBIF Occurrence Download.
Aedes japonicus	Non-native	America	35.0821	-83.1429	GBIF. 2026a. GBIF Occurrence Download.
Aedes japonicus	Non-native	America	39.959	-83.1314	GBIF. 2026a. GBIF Occurrence Download.
Aedes japonicus	Non-native	America	42.4717	-83.1089	GBIF. 2026a. GBIF Occurrence Download.
Aedes japonicus	Non-native	America	40.0455	-83.1075	GBIF. 2026a. GBIF Occurrence Download.
Aedes japonicus	Non-native	America	40.1185	-83.1033	GBIF. 2026a. GBIF Occurrence Download.
Aedes japonicus	Non-native	America	39.9767	-83.0953	GBIF. 2026a. GBIF Occurrence Download.
Aedes japonicus	Non-native	America	39.898	-83.0883	GBIF. 2026a. GBIF Occurrence Download.
Aedes japonicus	Non-native	America	40.0158	-83.0757	GBIF. 2026a. GBIF Occurrence Download.
Aedes japonicus	Non-native	America	40.0996	-83.0614	GBIF. 2026a. GBIF Occurrence Download.
Aedes japonicus	Non-native	America	39.8748	-83.0525	GBIF. 2026a. GBIF Occurrence Download.
Aedes japonicus	Non-native	America	39.9355	-83.0455	GBIF. 2026a. GBIF Occurrence Download.
Aedes japonicus	Non-native	America	40.127	-83.0411	GBIF. 2026a. GBIF Occurrence Download.
Aedes japonicus	Non-native	America	39.9945	-83.032	GBIF. 2026a. GBIF Occurrence Download.
Aedes japonicus	Non-native	America	42.2785	-83.0252	GBIF. 2026a. GBIF Occurrence Download.
Aedes japonicus	Non-native	America	39.8049	-83.0131	GBIF. 2026a. GBIF Occurrence Download.
Aedes japonicus	Non-native	America	40.0711	-83.0121	GBIF. 2026a. GBIF Occurrence Download.
Aedes japonicus	Non-native	America	35.5896	-83.0092	GBIF. 2026a. GBIF Occurrence Download.
Aedes japonicus	Non-native	America	35.4734	-83.0047	GBIF. 2026a. GBIF Occurrence Download.
Aedes japonicus	Non-native	America	39.9593	-82.9795	GBIF. 2026a. GBIF Occurrence Download.
Aedes japonicus	Non-native	America	40.07	-82.9663	GBIF. 2026a. GBIF Occurrence Download.
Aedes japonicus	Non-native	America	40.1305	-82.9588	GBIF. 2026a. GBIF Occurrence Download.
Aedes japonicus	Non-native	America	42.6251	-82.9581	GBIF. 2026a. GBIF Occurrence Download.
Aedes japonicus	Non-native	America	35.5263	-82.9566	GBIF. 2026a. GBIF Occurrence Download.
Aedes japonicus	Non-native	America	40.0311	-82.9497	GBIF. 2026a. GBIF Occurrence Download.
Aedes japonicus	Non-native	America	35.1415	-82.9432	GBIF. 2026a. GBIF Occurrence Download.
Aedes japonicus	Non-native	America	35.4923	-82.9253	GBIF. 2026a. GBIF Occurrence Download.
Aedes japonicus	Non-native	America	35.5528	-82.9049	GBIF. 2026a. GBIF Occurrence Download.
Aedes japonicus	Non-native	America	40.0387	-82.8979	GBIF. 2026a. GBIF Occurrence Download.
Aedes japonicus	Non-native	America	35.4725	-82.8955	GBIF. 2026a. GBIF Occurrence Download.
Aedes japonicus	Non-native	America	40.1043	-82.8942	GBIF. 2026a. GBIF Occurrence Download.
Aedes japonicus	Non-native	America	39.8521	-82.8923	GBIF. 2026a. GBIF Occurrence Download.
Aedes japonicus	Non-native	America	39.9082	-82.868	GBIF. 2026a. GBIF Occurrence Download.
Aedes japonicus	Non-native	America	39.9623	-82.8642	GBIF. 2026a. GBIF Occurrence Download.
Aedes japonicus	Non-native	America	40.0087	-82.8439	GBIF. 2026a. GBIF Occurrence Download.
Aedes japonicus	Non-native	America	34.6531	-82.8341	GBIF. 2026a. GBIF Occurrence Download.
Aedes japonicus	Non-native	America	42.1733	-82.8299	GBIF. 2026a. GBIF Occurrence Download.
Aedes japonicus	Non-native	America	40.0768	-82.8167	GBIF. 2026a. GBIF Occurrence Download.
Aedes japonicus	Non-native	America	39.9404	-82.8159	GBIF. 2026a. GBIF Occurrence Download.
Aedes japonicus	Non-native	America	39.9771	-82.8154	GBIF. 2026a. GBIF Occurrence Download.
Aedes japonicus	Non-native	America	39.8421	-82.8144	GBIF. 2026a. GBIF Occurrence Download.
Aedes japonicus	Non-native	America	40.012	-82.7945	GBIF. 2026a. GBIF Occurrence Download.
Aedes japonicus	Non-native	America	39.9637	-82.7735	GBIF. 2026a. GBIF Occurrence Download.
Aedes japonicus	Non-native	America	35.2306	-82.7359	GBIF. 2026a. GBIF Occurrence Download.
Aedes japonicus	Non-native	America	35.2661	-82.7093	GBIF. 2026a. GBIF Occurrence Download.
Aedes japonicus	Non-native	America	35.3111	-82.6714	GBIF. 2026a. GBIF Occurrence Download.
Aedes japonicus	Non-native	America	35.5754	-82.6557	GBIF. 2026a. GBIF Occurrence Download.
Aedes japonicus	Non-native	America	35.3115	-82.5883	GBIF. 2026a. GBIF Occurrence Download.
Aedes japonicus	Non-native	America	40.1935	-82.5868	GBIF. 2026a. GBIF Occurrence Download.
Aedes japonicus	Non-native	America	39.4766	-82.5829	GBIF. 2026a. GBIF Occurrence Download.
Aedes japonicus	Non-native	America	35.6445	-82.563	GBIF. 2026a. GBIF Occurrence Download.
Aedes japonicus	Non-native	America	35.4848	-82.5578	GBIF. 2026a. GBIF Occurrence Download.
Aedes japonicus	Non-native	America	35.8265	-82.552	GBIF. 2026a. GBIF Occurrence Download.
Aedes japonicus	Non-native	America	36.4166	-82.5326	GBIF. 2026a. GBIF Occurrence Download.
Aedes japonicus	Non-native	America	35.3297	-82.5037	GBIF. 2026a. GBIF Occurrence Download.
Aedes japonicus	Non-native	America	35.6008	-82.4996	GBIF. 2026a. GBIF Occurrence Download.
Aedes japonicus	Non-native	America	40.3932	-82.4854	GBIF. 2026a. GBIF Occurrence Download.
Aedes japonicus	Non-native	America	34.9151	-82.4275	GBIF. 2026a. GBIF Occurrence Download.
Aedes japonicus	Non-native	America	43.0022	-82.3942	GBIF. 2026a. GBIF Occurrence Download.
Aedes japonicus	Non-native	America	35.6283	-82.3627	GBIF. 2026a. GBIF Occurrence Download.
Aedes japonicus	Non-native	America	34.8333	-82.2975	GBIF. 2026a. GBIF Occurrence Download.
Aedes japonicus	Non-native	America	35.6245	-82.2818	GBIF. 2026a. GBIF Occurrence Download.
Aedes japonicus	Non-native	America	41.4015	-82.2415	GBIF. 2026a. GBIF Occurrence Download.
Aedes japonicus	Non-native	America	36.4397	-82.2251	GBIF. 2026a. GBIF Occurrence Download.
Aedes japonicus	Non-native	America	38.437	-82.134	GBIF. 2026a. GBIF Occurrence Download.
Aedes japonicus	Non-native	America	36.381	-82.1133	GBIF. 2026a. GBIF Occurrence Download.
Aedes japonicus	Non-native	America	39.3356	-82.0974	GBIF. 2026a. GBIF Occurrence Download.
Aedes japonicus	Non-native	America	41.0221	-82.0937	GBIF. 2026a. GBIF Occurrence Download.
Aedes japonicus	Non-native	America	36.152	-82.0069	GBIF. 2026a. GBIF Occurrence Download.
Aedes japonicus	Non-native	America	40.5444	-81.8971	GBIF. 2026a. GBIF Occurrence Download.
Aedes japonicus	Non-native	America	41.4334	-81.8892	GBIF. 2026a. GBIF Occurrence Download.
Aedes japonicus	Non-native	America	34.0081	-81.8744	GBIF. 2026a. GBIF Occurrence Download.
Aedes japonicus	Non-native	America	36.0944	-81.8332	GBIF. 2026a. GBIF Occurrence Download.
Aedes japonicus	Non-native	America	41.0608	-81.6868	GBIF. 2026a. GBIF Occurrence Download.
Aedes japonicus	Non-native	America	41.2005	-81.6594	GBIF. 2026a. GBIF Occurrence Download.
Aedes japonicus	Non-native	America	36.1464	-81.6487	GBIF. 2026a. GBIF Occurrence Download.
Aedes japonicus	Non-native	America	41.3289	-81.6447	GBIF. 2026a. GBIF Occurrence Download.
Aedes japonicus	Non-native	America	41.4805	-81.6211	GBIF. 2026a. GBIF Occurrence Download.
Aedes japonicus	Non-native	America	36.3031	-81.5515	GBIF. 2026a. GBIF Occurrence Download.
Aedes japonicus	Non-native	America	41.0992	-81.5502	GBIF. 2026a. GBIF Occurrence Download.
Aedes japonicus	Non-native	America	41.0382	-81.5216	GBIF. 2026a. GBIF Occurrence Download.
Aedes japonicus	Non-native	America	41.4664	-81.5211	GBIF. 2026a. GBIF Occurrence Download.
Aedes japonicus	Non-native	America	41.5176	-81.4802	GBIF. 2026a. GBIF Occurrence Download.
Aedes japonicus	Non-native	America	41.5452	-81.4736	GBIF. 2026a. GBIF Occurrence Download.
Aedes japonicus	Non-native	America	41.6192	-81.4569	GBIF. 2026a. GBIF Occurrence Download.
Aedes japonicus	Non-native	America	41.4605	-81.4495	GBIF. 2026a. GBIF Occurrence Download.
Aedes japonicus	Non-native	America	41.4129	-81.4431	GBIF. 2026a. GBIF Occurrence Download.
Aedes japonicus	Non-native	America	41.0585	-81.4278	GBIF. 2026a. GBIF Occurrence Download.
Aedes japonicus	Non-native	America	40.8366	-81.3423	GBIF. 2026a. GBIF Occurrence Download.
Aedes japonicus	Non-native	America	43.18	-81.3373	GBIF. 2026a. GBIF Occurrence Download.
Aedes japonicus	Non-native	America	42.9994	-81.309	GBIF. 2026a. GBIF Occurrence Download.
Aedes japonicus	Non-native	America	43.0488	-81.283	GBIF. 2026a. GBIF Occurrence Download.
Aedes japonicus	Non-native	America	43.0112	-81.2696	GBIF. 2026a. GBIF Occurrence Download.
Aedes japonicus	Non-native	America	42.9365	-81.2355	GBIF. 2026a. GBIF Occurrence Download.
Aedes japonicus	Non-native	America	37.3679	-81.222	GBIF. 2026a. GBIF Occurrence Download.
Aedes japonicus	Non-native	America	41.7224	-81.2212	GBIF. 2026a. GBIF Occurrence Download.
Aedes japonicus	Non-native	America	42.8626	-81.2032	GBIF. 2026a. GBIF Occurrence Download.
Aedes japonicus	Non-native	America	40.4123	-81.1822	GBIF. 2026a. GBIF Occurrence Download.
Aedes japonicus	Non-native	America	42.9661	-81.1765	GBIF. 2026a. GBIF Occurrence Download.
Aedes japonicus	Non-native	America	42.9895	-81.1563	GBIF. 2026a. GBIF Occurrence Download.
Aedes japonicus	Non-native	America	34.1745	-81.1353	GBIF. 2026a. GBIF Occurrence Download.
Aedes japonicus	Non-native	America	34.1857	-81.1011	GBIF. 2026a. GBIF Occurrence Download.
Aedes japonicus	Non-native	America	34.0489	-81.0937	GBIF. 2026a. GBIF Occurrence Download.
Aedes japonicus	Non-native	America	42.8832	-81.0931	GBIF. 2026a. GBIF Occurrence Download.
Aedes japonicus	Non-native	America	34.0092	-81.0748	GBIF. 2026a. GBIF Occurrence Download.
Aedes japonicus	Non-native	America	42.9959	-81.063	GBIF. 2026a. GBIF Occurrence Download.
Aedes japonicus	Non-native	America	41.0369	-81.0273	GBIF. 2026a. GBIF Occurrence Download.
Aedes japonicus	Non-native	America	35.1912	-80.9481	GBIF. 2026a. GBIF Occurrence Download.
Aedes japonicus	Non-native	America	34.1727	-80.9437	GBIF. 2026a. GBIF Occurrence Download.
Aedes japonicus	Non-native	America	35.1497	-80.9184	GBIF. 2026a. GBIF Occurrence Download.
Aedes japonicus	Non-native	America	41.0131	-80.8955	GBIF. 2026a. GBIF Occurrence Download.
Aedes japonicus	Non-native	America	35.2244	-80.885	GBIF. 2026a. GBIF Occurrence Download.
Aedes japonicus	Non-native	America	35.3263	-80.827	GBIF. 2026a. GBIF Occurrence Download.
Aedes japonicus	Non-native	America	35.0721	-80.7598	GBIF. 2026a. GBIF Occurrence Download.
Aedes japonicus	Non-native	America	35.4761	-80.7444	GBIF. 2026a. GBIF Occurrence Download.
Aedes japonicus	Non-native	America	41.2543	-80.7225	GBIF. 2026a. GBIF Occurrence Download.
Aedes japonicus	Non-native	America	35.4392	-80.6542	GBIF. 2026a. GBIF Occurrence Download.
Aedes japonicus	Non-native	America	35.3897	-80.6058	GBIF. 2026a. GBIF Occurrence Download.
Aedes japonicus	Non-native	America	43.4226	-80.5263	GBIF. 2026a. GBIF Occurrence Download.
Aedes japonicus	Non-native	America	43.4647	-80.4932	GBIF. 2026a. GBIF Occurrence Download.
Aedes japonicus	Non-native	America	37.2109	-80.4382	GBIF. 2026a. GBIF Occurrence Download.
Aedes japonicus	Non-native	America	43.4539	-80.4334	GBIF. 2026a. GBIF Occurrence Download.
Aedes japonicus	Non-native	America	36.0956	-80.4266	GBIF. 2026a. GBIF Occurrence Download.
Aedes japonicus	Non-native	America	37.1882	-80.3834	GBIF. 2026a. GBIF Occurrence Download.
Aedes japonicus	Non-native	America	43.37	-80.35	GBIF. 2026a. GBIF Occurrence Download.
Aedes japonicus	Non-native	America	36.0761	-80.3368	GBIF. 2026a. GBIF Occurrence Download.
Aedes japonicus	Non-native	America	40.9947	-80.3291	GBIF. 2026a. GBIF Occurrence Download.
Aedes japonicus	Non-native	America	36.1571	-80.3216	GBIF. 2026a. GBIF Occurrence Download.
Aedes japonicus	Non-native	America	36.2319	-80.302	GBIF. 2026a. GBIF Occurrence Download.
Aedes japonicus	Non-native	America	42.8423	-80.3006	GBIF. 2026a. GBIF Occurrence Download.
Aedes japonicus	Non-native	America	43.5496	-80.2583	GBIF. 2026a. GBIF Occurrence Download.
Aedes japonicus	Non-native	America	36.1336	-80.2509	GBIF. 2026a. GBIF Occurrence Download.
Aedes japonicus	Non-native	America	43.5097	-80.2205	GBIF. 2026a. GBIF Occurrence Download.
Aedes japonicus	Non-native	America	36.0664	-80.2142	GBIF. 2026a. GBIF Occurrence Download.
Aedes japonicus	Non-native	America	43.5424	-80.2133	GBIF. 2026a. GBIF Occurrence Download.
Aedes japonicus	Non-native	America	40.2636	-80.1831	GBIF. 2026a. GBIF Occurrence Download.
Aedes japonicus	Non-native	America	41.6338	-80.1496	GBIF. 2026a. GBIF Occurrence Download.
Aedes japonicus	Non-native	America	40.446	-80.1484	GBIF. 2026a. GBIF Occurrence Download.
Aedes japonicus	Non-native	America	36.1616	-80.139	GBIF. 2026a. GBIF Occurrence Download.
Aedes japonicus	Non-native	America	40.7922	-80.1303	GBIF. 2026a. GBIF Occurrence Download.
Aedes japonicus	Non-native	America	35.8081	-80.1228	GBIF. 2026a. GBIF Occurrence Download.
Aedes japonicus	Non-native	America	40.2732	-80.1201	GBIF. 2026a. GBIF Occurrence Download.
Aedes japonicus	Non-native	America	36.0901	-80.114	GBIF. 2026a. GBIF Occurrence Download.
Aedes japonicus	Non-native	America	40.4048	-80.0931	GBIF. 2026a. GBIF Occurrence Download.
Aedes japonicus	Non-native	America	35.8832	-80.0885	GBIF. 2026a. GBIF Occurrence Download.
Aedes japonicus	Non-native	America	40.4869	-80.0821	GBIF. 2026a. GBIF Occurrence Download.
Aedes japonicus	Non-native	America	42.1169	-80.0614	GBIF. 2026a. GBIF Occurrence Download.
Aedes japonicus	Non-native	America	35.9956	-80.0595	GBIF. 2026a. GBIF Occurrence Download.
Aedes japonicus	Non-native	America	40.3079	-80.0434	GBIF. 2026a. GBIF Occurrence Download.
Aedes japonicus	Non-native	America	40.3483	-80.0403	GBIF. 2026a. GBIF Occurrence Download.
Aedes japonicus	Non-native	America	40.3919	-80.0351	GBIF. 2026a. GBIF Occurrence Download.
Aedes japonicus	Non-native	America	35.9108	-80.0324	GBIF. 2026a. GBIF Occurrence Download.
Aedes japonicus	Non-native	America	33.0369	-80.0324	GBIF. 2026a. GBIF Occurrence Download.
Aedes japonicus	Non-native	America	40.5404	-80.0223	GBIF. 2026a. GBIF Occurrence Download.
Aedes japonicus	Non-native	America	42.1428	-80.0115	GBIF. 2026a. GBIF Occurrence Download.
Aedes japonicus	Non-native	America	40.2432	-80.007	GBIF. 2026a. GBIF Occurrence Download.
Aedes japonicus	Non-native	America	40.4273	-79.9995	GBIF. 2026a. GBIF Occurrence Download.
Aedes japonicus	Non-native	America	36.11	-79.9926	GBIF. 2026a. GBIF Occurrence Download.
Aedes japonicus	Non-native	America	43.2183	-79.9886	GBIF. 2026a. GBIF Occurrence Download.
Aedes japonicus	Non-native	America	40.3756	-79.9794	GBIF. 2026a. GBIF Occurrence Download.
Aedes japonicus	Non-native	America	39.9523	-79.9752	GBIF. 2026a. GBIF Occurrence Download.
Aedes japonicus	Non-native	America	43.2143	-79.9262	GBIF. 2026a. GBIF Occurrence Download.
Aedes japonicus	Non-native	America	40.4836	-79.9179	GBIF. 2026a. GBIF Occurrence Download.
Aedes japonicus	Non-native	America	43.3208	-79.9014	GBIF. 2026a. GBIF Occurrence Download.
Aedes japonicus	Non-native	America	43.2897	-79.8922	GBIF. 2026a. GBIF Occurrence Download.
Aedes japonicus	Non-native	America	36.0654	-79.8853	GBIF. 2026a. GBIF Occurrence Download.
Aedes japonicus	Non-native	America	43.313	-79.8488	GBIF. 2026a. GBIF Occurrence Download.
Aedes japonicus	Non-native	America	39.6241	-79.8468	GBIF. 2026a. GBIF Occurrence Download.
Aedes japonicus	Non-native	America	36.1152	-79.8326	GBIF. 2026a. GBIF Occurrence Download.
Aedes japonicus	Non-native	America	40.4741	-79.8131	GBIF. 2026a. GBIF Occurrence Download.
Aedes japonicus	Non-native	America	43.274	-79.809	GBIF. 2026a. GBIF Occurrence Download.
Aedes japonicus	Non-native	America	36.0415	-79.8005	GBIF. 2026a. GBIF Occurrence Download.
Aedes japonicus	Non-native	America	44.0205	-79.7918	GBIF. 2026a. GBIF Occurrence Download.
Aedes japonicus	Non-native	America	43.5088	-79.7856	GBIF. 2026a. GBIF Occurrence Download.
Aedes japonicus	Non-native	America	43.6941	-79.7837	GBIF. 2026a. GBIF Occurrence Download.
Aedes japonicus	Non-native	America	36.0914	-79.7783	GBIF. 2026a. GBIF Occurrence Download.
Aedes japonicus	Non-native	America	36.0446	-79.7662	GBIF. 2026a. GBIF Occurrence Download.
Aedes japonicus	Non-native	America	43.438	-79.7362	GBIF. 2026a. GBIF Occurrence Download.
Aedes japonicus	Non-native	America	43.5749	-79.7206	GBIF. 2026a. GBIF Occurrence Download.
Aedes japonicus	Non-native	America	42.861	-79.703	GBIF. 2026a. GBIF Occurrence Download.
Aedes japonicus	Non-native	America	44.409	-79.6986	GBIF. 2026a. GBIF Occurrence Download.
Aedes japonicus	Non-native	America	44.3582	-79.6788	GBIF. 2026a. GBIF Occurrence Download.
Aedes japonicus	Non-native	America	43.5647	-79.6743	GBIF. 2026a. GBIF Occurrence Download.
Aedes japonicus	Non-native	America	43.5223	-79.6724	GBIF. 2026a. GBIF Occurrence Download.
Aedes japonicus	Non-native	America	35.9727	-79.6423	GBIF. 2026a. GBIF Occurrence Download.
Aedes japonicus	Non-native	America	43.4969	-79.6036	GBIF. 2026a. GBIF Occurrence Download.
Aedes japonicus	Non-native	America	43.6448	-79.6013	GBIF. 2026a. GBIF Occurrence Download.
Aedes japonicus	Non-native	America	43.2033	-79.5701	GBIF. 2026a. GBIF Occurrence Download.
Aedes japonicus	Non-native	America	43.6526	-79.5628	GBIF. 2026a. GBIF Occurrence Download.
Aedes japonicus	Non-native	America	45.1185	-79.5579	GBIF. 2026a. GBIF Occurrence Download.
Aedes japonicus	Non-native	America	43.5946	-79.5215	GBIF. 2026a. GBIF Occurrence Download.
Aedes japonicus	Non-native	America	43.6677	-79.5142	GBIF. 2026a. GBIF Occurrence Download.
Aedes japonicus	Non-native	America	44.0512	-79.4859	GBIF. 2026a. GBIF Occurrence Download.
Aedes japonicus	Non-native	America	43.7424	-79.4813	GBIF. 2026a. GBIF Occurrence Download.
Aedes japonicus	Non-native	America	43.6522	-79.4618	GBIF. 2026a. GBIF Occurrence Download.
Aedes japonicus	Non-native	America	44.5576	-79.4445	GBIF. 2026a. GBIF Occurrence Download.
Aedes japonicus	Non-native	America	43.6742	-79.432	GBIF. 2026a. GBIF Occurrence Download.
Aedes japonicus	Non-native	America	43.9482	-79.4281	GBIF. 2026a. GBIF Occurrence Download.
Aedes japonicus	Non-native	America	43.6458	-79.4141	GBIF. 2026a. GBIF Occurrence Download.
Aedes japonicus	Non-native	America	43.8273	-79.4108	GBIF. 2026a. GBIF Occurrence Download.
Aedes japonicus	Non-native	America	43.7213	-79.406	GBIF. 2026a. GBIF Occurrence Download.
Aedes japonicus	Non-native	America	39.54	-79.3972	GBIF. 2026a. GBIF Occurrence Download.
Aedes japonicus	Non-native	America	40.324	-79.3723	GBIF. 2026a. GBIF Occurrence Download.
Aedes japonicus	Non-native	America	39.5816	-79.3591	GBIF. 2026a. GBIF Occurrence Download.
Aedes japonicus	Non-native	America	43.8786	-79.3409	GBIF. 2026a. GBIF Occurrence Download.
Aedes japonicus	Non-native	America	38.975	-79.3372	GBIF. 2026a. GBIF Occurrence Download.
Aedes japonicus	Non-native	America	39.5007	-79.3332	GBIF. 2026a. GBIF Occurrence Download.
Aedes japonicus	Non-native	America	43.6631	-79.3276	GBIF. 2026a. GBIF Occurrence Download.
Aedes japonicus	Non-native	America	39.4436	-79.3185	GBIF. 2026a. GBIF Occurrence Download.
Aedes japonicus	Non-native	America	43.6972	-79.3175	GBIF. 2026a. GBIF Occurrence Download.
Aedes japonicus	Non-native	America	39.5476	-79.3046	GBIF. 2026a. GBIF Occurrence Download.
Aedes japonicus	Non-native	America	40.2609	-79.279	GBIF. 2026a. GBIF Occurrence Download.
Aedes japonicus	Non-native	America	43.8097	-79.2773	GBIF. 2026a. GBIF Occurrence Download.
Aedes japonicus	Non-native	America	43.6878	-79.2749	GBIF. 2026a. GBIF Occurrence Download.
Aedes japonicus	Non-native	America	39.4697	-79.262	GBIF. 2026a. GBIF Occurrence Download.
Aedes japonicus	Non-native	America	39.5139	-79.2365	GBIF. 2026a. GBIF Occurrence Download.
Aedes japonicus	Non-native	America	43.82	-79.19	GBIF. 2026a. GBIF Occurrence Download.
Aedes japonicus	Non-native	America	40.6186	-79.1576	GBIF. 2026a. GBIF Occurrence Download.
Aedes japonicus	Non-native	America	43.808	-79.137	GBIF. 2026a. GBIF Occurrence Download.
Aedes japonicus	Non-native	America	35.8766	-79.1366	GBIF. 2026a. GBIF Occurrence Download.
Aedes japonicus	Non-native	America	35.8692	-79.0827	GBIF. 2026a. GBIF Occurrence Download.
Aedes japonicus	Non-native	America	43.1261	-79.0554	GBIF. 2026a. GBIF Occurrence Download.
Aedes japonicus	Non-native	America	35.0188	-78.9918	GBIF. 2026a. GBIF Occurrence Download.
Aedes japonicus	Non-native	America	35.2009	-78.989	GBIF. 2026a. GBIF Occurrence Download.
Aedes japonicus	Non-native	America	34.9942	-78.9298	GBIF. 2026a. GBIF Occurrence Download.
Aedes japonicus	Non-native	America	35.9351	-78.9173	GBIF. 2026a. GBIF Occurrence Download.
Aedes japonicus	Non-native	America	35.0658	-78.9012	GBIF. 2026a. GBIF Occurrence Download.
Aedes japonicus	Non-native	America	35.1148	-78.8979	GBIF. 2026a. GBIF Occurrence Download.
Aedes japonicus	Non-native	America	42.6523	-78.897	GBIF. 2026a. GBIF Occurrence Download.
Aedes japonicus	Non-native	America	43.8828	-78.8854	GBIF. 2026a. GBIF Occurrence Download.
Aedes japonicus	Non-native	America	42.963	-78.8845	GBIF. 2026a. GBIF Occurrence Download.
Aedes japonicus	Non-native	America	43.946	-78.8763	GBIF. 2026a. GBIF Occurrence Download.
Aedes japonicus	Non-native	America	43.11	-78.8711	GBIF. 2026a. GBIF Occurrence Download.
Aedes japonicus	Non-native	America	35.6821	-78.8449	GBIF. 2026a. GBIF Occurrence Download.
Aedes japonicus	Non-native	America	43.9368	-78.8138	GBIF. 2026a. GBIF Occurrence Download.
Aedes japonicus	Non-native	America	44.5991	-78.7962	GBIF. 2026a. GBIF Occurrence Download.
Aedes japonicus	Non-native	America	35.5861	-78.7812	GBIF. 2026a. GBIF Occurrence Download.
Aedes japonicus	Non-native	America	35.9008	-78.7662	GBIF. 2026a. GBIF Occurrence Download.
Aedes japonicus	Non-native	America	35.7627	-78.7468	GBIF. 2026a. GBIF Occurrence Download.
Aedes japonicus	Non-native	America	38.077	-78.7056	GBIF. 2026a. GBIF Occurrence Download.
Aedes japonicus	Non-native	America	43.9282	-78.6974	GBIF. 2026a. GBIF Occurrence Download.
Aedes japonicus	Non-native	America	35.8213	-78.6968	GBIF. 2026a. GBIF Occurrence Download.
Aedes japonicus	Non-native	America	35.6264	-78.6771	GBIF. 2026a. GBIF Occurrence Download.
Aedes japonicus	Non-native	America	35.7955	-78.6724	GBIF. 2026a. GBIF Occurrence Download.
Aedes japonicus	Non-native	America	35.7906	-78.6349	GBIF. 2026a. GBIF Occurrence Download.
Aedes japonicus	Non-native	America	33.9296	-78.6112	GBIF. 2026a. GBIF Occurrence Download.
Aedes japonicus	Non-native	America	35.9058	-78.5816	GBIF. 2026a. GBIF Occurrence Download.
Aedes japonicus	Non-native	America	42.9621	-78.5326	GBIF. 2026a. GBIF Occurrence Download.
Aedes japonicus	Non-native	America	35.7948	-78.5196	GBIF. 2026a. GBIF Occurrence Download.
Aedes japonicus	Non-native	America	42.9133	-78.4843	GBIF. 2026a. GBIF Occurrence Download.
Aedes japonicus	Non-native	America	35.7869	-78.4552	GBIF. 2026a. GBIF Occurrence Download.
Aedes japonicus	Non-native	America	33.9593	-78.4141	GBIF. 2026a. GBIF Occurrence Download.
Aedes japonicus	Non-native	America	44.2832	-78.369	GBIF. 2026a. GBIF Occurrence Download.
Aedes japonicus	Non-native	America	38.556	-78.3524	GBIF. 2026a. GBIF Occurrence Download.
Aedes japonicus	Non-native	America	35.7985	-78.3456	GBIF. 2026a. GBIF Occurrence Download.
Aedes japonicus	Non-native	America	39.6417	-78.3339	GBIF. 2026a. GBIF Occurrence Download.
Aedes japonicus	Non-native	America	44.3095	-78.3058	GBIF. 2026a. GBIF Occurrence Download.
Aedes japonicus	Non-native	America	37.4198	-78.2959	GBIF. 2026a. GBIF Occurrence Download.
Aedes japonicus	Non-native	America	34.0588	-78.1676	GBIF. 2026a. GBIF Occurrence Download.
Aedes japonicus	Non-native	America	38.9009	-78.1553	GBIF. 2026a. GBIF Occurrence Download.
Aedes japonicus	Non-native	America	34.3149	-78.1477	GBIF. 2026a. GBIF Occurrence Download.
Aedes japonicus	Non-native	America	45.0737	-78.087	GBIF. 2026a. GBIF Occurrence Download.
Aedes japonicus	Non-native	America	39.6905	-78.0423	GBIF. 2026a. GBIF Occurrence Download.
Aedes japonicus	Non-native	America	33.9353	-78.0244	GBIF. 2026a. GBIF Occurrence Download.
Aedes japonicus	Non-native	America	40.7934	-78.0167	GBIF. 2026a. GBIF Occurrence Download.
Aedes japonicus	Non-native	America	38.5715	-77.99	GBIF. 2026a. GBIF Occurrence Download.
Aedes japonicus	Non-native	America	40.801	-77.8964	GBIF. 2026a. GBIF Occurrence Download.
Aedes japonicus	Non-native	America	40.7302	-77.8827	GBIF. 2026a. GBIF Occurrence Download.
Aedes japonicus	Non-native	America	35.9162	-77.8069	GBIF. 2026a. GBIF Occurrence Download.
Aedes japonicus	Non-native	America	44.3878	-77.8034	GBIF. 2026a. GBIF Occurrence Download.
Aedes japonicus	Non-native	America	34.2906	-77.7869	GBIF. 2026a. GBIF Occurrence Download.
Aedes japonicus	Non-native	America	39.1346	-77.7708	GBIF. 2026a. GBIF Occurrence Download.
Aedes japonicus	Non-native	America	36.0519	-77.7477	GBIF. 2026a. GBIF Occurrence Download.
Aedes japonicus	Non-native	America	44.045	-77.7435	GBIF. 2026a. GBIF Occurrence Download.
Aedes japonicus	Non-native	America	36.1052	-77.7118	GBIF. 2026a. GBIF Occurrence Download.
Aedes japonicus	Non-native	America	35.8126	-77.6957	GBIF. 2026a. GBIF Occurrence Download.
Aedes japonicus	Non-native	America	35.7918	-77.6385	GBIF. 2026a. GBIF Occurrence Download.
Aedes japonicus	Non-native	America	35.8599	-77.6255	GBIF. 2026a. GBIF Occurrence Download.
Aedes japonicus	Non-native	America	34.7571	-77.6159	GBIF. 2026a. GBIF Occurrence Download.
Aedes japonicus	Non-native	America	43.1571	-77.6059	GBIF. 2026a. GBIF Occurrence Download.
Aedes japonicus	Non-native	America	36.0919	-77.5796	GBIF. 2026a. GBIF Occurrence Download.
Aedes japonicus	Non-native	America	43.2182	-77.5502	GBIF. 2026a. GBIF Occurrence Download.
Aedes japonicus	Non-native	America	38.8091	-77.525	GBIF. 2026a. GBIF Occurrence Download.
Aedes japonicus	Non-native	America	38.9297	-77.5138	GBIF. 2026a. GBIF Occurrence Download.
Aedes japonicus	Non-native	America	38.9817	-77.5126	GBIF. 2026a. GBIF Occurrence Download.
Aedes japonicus	Non-native	America	34.6679	-77.5121	GBIF. 2026a. GBIF Occurrence Download.
Aedes japonicus	Non-native	America	36.0055	-77.5072	GBIF. 2026a. GBIF Occurrence Download.
Aedes japonicus	Non-native	America	39.3857	-77.5052	GBIF. 2026a. GBIF Occurrence Download.
Aedes japonicus	Non-native	America	43.1108	-77.5031	GBIF. 2026a. GBIF Occurrence Download.
Aedes japonicus	Non-native	America	34.5408	-77.5005	GBIF. 2026a. GBIF Occurrence Download.
Aedes japonicus	Non-native	America	43.1433	-77.4809	GBIF. 2026a. GBIF Occurrence Download.
Aedes japonicus	Non-native	America	38.9073	-77.4803	GBIF. 2026a. GBIF Occurrence Download.
Aedes japonicus	Non-native	America	38.8046	-77.4471	GBIF. 2026a. GBIF Occurrence Download.
Aedes japonicus	Non-native	America	43.0084	-77.4391	GBIF. 2026a. GBIF Occurrence Download.
Aedes japonicus	Non-native	America	35.3854	-77.4377	GBIF. 2026a. GBIF Occurrence Download.
Aedes japonicus	Non-native	America	35.9967	-77.4336	GBIF. 2026a. GBIF Occurrence Download.
Aedes japonicus	Non-native	America	39.1894	-77.4319	GBIF. 2026a. GBIF Occurrence Download.
Aedes japonicus	Non-native	America	34.7414	-77.4198	GBIF. 2026a. GBIF Occurrence Download.
Aedes japonicus	Non-native	America	35.52	-77.4198	GBIF. 2026a. GBIF Occurrence Download.
Aedes japonicus	Non-native	America	38.6853	-77.3652	GBIF. 2026a. GBIF Occurrence Download.
Aedes japonicus	Non-native	America	38.9353	-77.3559	GBIF. 2026a. GBIF Occurrence Download.
Aedes japonicus	Non-native	America	38.8605	-77.325	GBIF. 2026a. GBIF Occurrence Download.
Aedes japonicus	Non-native	America	44.4772	-77.3126	GBIF. 2026a. GBIF Occurrence Download.
Aedes japonicus	Non-native	America	42.8813	-77.2937	GBIF. 2026a. GBIF Occurrence Download.
Aedes japonicus	Non-native	America	38.9613	-77.2864	GBIF. 2026a. GBIF Occurrence Download.
Aedes japonicus	Non-native	America	38.7934	-77.2716	GBIF. 2026a. GBIF Occurrence Download.
Aedes japonicus	Non-native	America	39.136	-77.2565	GBIF. 2026a. GBIF Occurrence Download.
Aedes japonicus	Non-native	America	39.0848	-77.2545	GBIF. 2026a. GBIF Occurrence Download.
Aedes japonicus	Non-native	America	39.4235	-77.2292	GBIF. 2026a. GBIF Occurrence Download.
Aedes japonicus	Non-native	America	38.8512	-77.2147	GBIF. 2026a. GBIF Occurrence Download.
Aedes japonicus	Non-native	America	39.2726	-77.2142	GBIF. 2026a. GBIF Occurrence Download.
Aedes japonicus	Non-native	America	39.1646	-77.1888	GBIF. 2026a. GBIF Occurrence Download.
Aedes japonicus	Non-native	America	43.1165	-77.1355	GBIF. 2026a. GBIF Occurrence Download.
Aedes japonicus	Non-native	America	39.0916	-77.1225	GBIF. 2026a. GBIF Occurrence Download.
Aedes japonicus	Non-native	America	39.0513	-77.1176	GBIF. 2026a. GBIF Occurrence Download.
Aedes japonicus	Non-native	America	39.0065	-77.1017	GBIF. 2026a. GBIF Occurrence Download.
Aedes japonicus	Non-native	America	38.7598	-77.0932	GBIF. 2026a. GBIF Occurrence Download.
Aedes japonicus	Non-native	America	38.9383	-77.0789	GBIF. 2026a. GBIF Occurrence Download.
Aedes japonicus	Non-native	America	39.0373	-77.0734	GBIF. 2026a. GBIF Occurrence Download.
Aedes japonicus	Non-native	America	38.9779	-77.0476	GBIF. 2026a. GBIF Occurrence Download.
Aedes japonicus	Non-native	America	39.5266	-77.0412	GBIF. 2026a. GBIF Occurrence Download.
Aedes japonicus	Non-native	America	38.775	-77.0175	GBIF. 2026a. GBIF Occurrence Download.
Aedes japonicus	Non-native	America	38.7133	-77.0143	GBIF. 2026a. GBIF Occurrence Download.
Aedes japonicus	Non-native	America	39.0845	-77.0051	GBIF. 2026a. GBIF Occurrence Download.
Aedes japonicus	Non-native	America	39.191	-76.9958	GBIF. 2026a. GBIF Occurrence Download.
Aedes japonicus	Non-native	America	38.8096	-76.9932	GBIF. 2026a. GBIF Occurrence Download.
Aedes japonicus	Non-native	America	38.7327	-76.9845	GBIF. 2026a. GBIF Occurrence Download.
Aedes japonicus	Non-native	America	38.851	-76.9745	GBIF. 2026a. GBIF Occurrence Download.
Aedes japonicus	Non-native	America	38.9523	-76.9736	GBIF. 2026a. GBIF Occurrence Download.
Aedes japonicus	Non-native	America	39.022	-76.9607	GBIF. 2026a. GBIF Occurrence Download.
Aedes japonicus	Non-native	America	38.9786	-76.9586	GBIF. 2026a. GBIF Occurrence Download.
Aedes japonicus	Non-native	America	38.7944	-76.957	GBIF. 2026a. GBIF Occurrence Download.
Aedes japonicus	Non-native	America	38.0254	-76.9537	GBIF. 2026a. GBIF Occurrence Download.
Aedes japonicus	Non-native	America	39.0457	-76.9409	GBIF. 2026a. GBIF Occurrence Download.
Aedes japonicus	Non-native	America	38.761	-76.9341	GBIF. 2026a. GBIF Occurrence Download.
Aedes japonicus	Non-native	America	39.1465	-76.9336	GBIF. 2026a. GBIF Occurrence Download.
Aedes japonicus	Non-native	America	38.9521	-76.9325	GBIF. 2026a. GBIF Occurrence Download.
Aedes japonicus	Non-native	America	38.8375	-76.9315	GBIF. 2026a. GBIF Occurrence Download.
Aedes japonicus	Non-native	America	38.9216	-76.921	GBIF. 2026a. GBIF Occurrence Download.
Aedes japonicus	Non-native	America	38.9853	-76.9176	GBIF. 2026a. GBIF Occurrence Download.
Aedes japonicus	Non-native	America	39.0205	-76.9163	GBIF. 2026a. GBIF Occurrence Download.
Aedes japonicus	Non-native	America	40.2444	-76.916	GBIF. 2026a. GBIF Occurrence Download.
Aedes japonicus	Non-native	America	39.2131	-76.9134	GBIF. 2026a. GBIF Occurrence Download.
Aedes japonicus	Non-native	America	38.892	-76.9062	GBIF. 2026a. GBIF Occurrence Download.
Aedes japonicus	Non-native	America	39.1056	-76.9052	GBIF. 2026a. GBIF Occurrence Download.
Aedes japonicus	Non-native	America	45.3707	-76.9049	GBIF. 2026a. GBIF Occurrence Download.
Aedes japonicus	Non-native	America	38.8508	-76.9004	GBIF. 2026a. GBIF Occurrence Download.
Aedes japonicus	Non-native	America	39.3491	-76.8996	GBIF. 2026a. GBIF Occurrence Download.
Aedes japonicus	Non-native	America	38.9417	-76.8942	GBIF. 2026a. GBIF Occurrence Download.
Aedes japonicus	Non-native	America	40.3501	-76.8931	GBIF. 2026a. GBIF Occurrence Download.
Aedes japonicus	Non-native	America	39.0461	-76.8832	GBIF. 2026a. GBIF Occurrence Download.
Aedes japonicus	Non-native	America	38.9692	-76.8811	GBIF. 2026a. GBIF Occurrence Download.
Aedes japonicus	Non-native	America	38.7491	-76.8811	GBIF. 2026a. GBIF Occurrence Download.
Aedes japonicus	Non-native	America	39.0823	-76.8802	GBIF. 2026a. GBIF Occurrence Download.
Aedes japonicus	Non-native	America	38.8921	-76.8713	GBIF. 2026a. GBIF Occurrence Download.
Aedes japonicus	Non-native	America	38.7158	-76.8684	GBIF. 2026a. GBIF Occurrence Download.
Aedes japonicus	Non-native	America	39.0064	-76.8666	GBIF. 2026a. GBIF Occurrence Download.
Aedes japonicus	Non-native	America	38.8533	-76.8637	GBIF. 2026a. GBIF Occurrence Download.
Aedes japonicus	Non-native	America	38.7732	-76.8517	GBIF. 2026a. GBIF Occurrence Download.
Aedes japonicus	Non-native	America	39.1035	-76.8505	GBIF. 2026a. GBIF Occurrence Download.
Aedes japonicus	Non-native	America	38.8928	-76.8333	GBIF. 2026a. GBIF Occurrence Download.
Aedes japonicus	Non-native	America	39.0553	-76.8227	GBIF. 2026a. GBIF Occurrence Download.
Aedes japonicus	Non-native	America	38.7503	-76.8214	GBIF. 2026a. GBIF Occurrence Download.
Aedes japonicus	Non-native	America	39.0019	-76.8198	GBIF. 2026a. GBIF Occurrence Download.
Aedes japonicus	Non-native	America	38.9668	-76.8169	GBIF. 2026a. GBIF Occurrence Download.
Aedes japonicus	Non-native	America	38.8243	-76.81	GBIF. 2026a. GBIF Occurrence Download.
Aedes japonicus	Non-native	America	39.0842	-76.8051	GBIF. 2026a. GBIF Occurrence Download.
Aedes japonicus	Non-native	America	38.9324	-76.7917	GBIF. 2026a. GBIF Occurrence Download.
Aedes japonicus	Non-native	America	38.86	-76.7907	GBIF. 2026a. GBIF Occurrence Download.
Aedes japonicus	Non-native	America	41.7836	-76.7904	GBIF. 2026a. GBIF Occurrence Download.
Aedes japonicus	Non-native	America	38.8941	-76.788	GBIF. 2026a. GBIF Occurrence Download.
Aedes japonicus	Non-native	America	36.682	-76.787	GBIF. 2026a. GBIF Occurrence Download.
Aedes japonicus	Non-native	America	39.0426	-76.7868	GBIF. 2026a. GBIF Occurrence Download.
Aedes japonicus	Non-native	America	39.4323	-76.7855	GBIF. 2026a. GBIF Occurrence Download.
Aedes japonicus	Non-native	America	39.3119	-76.7764	GBIF. 2026a. GBIF Occurrence Download.
Aedes japonicus	Non-native	America	39.0055	-76.7755	GBIF. 2026a. GBIF Occurrence Download.
Aedes japonicus	Non-native	America	38.9773	-76.7742	GBIF. 2026a. GBIF Occurrence Download.
Aedes japonicus	Non-native	America	39.0702	-76.7727	GBIF. 2026a. GBIF Occurrence Download.
Aedes japonicus	Non-native	America	38.8916	-76.7472	GBIF. 2026a. GBIF Occurrence Download.
Aedes japonicus	Non-native	America	38.8246	-76.7437	GBIF. 2026a. GBIF Occurrence Download.
Aedes japonicus	Non-native	America	38.9939	-76.7253	GBIF. 2026a. GBIF Occurrence Download.
Aedes japonicus	Non-native	America	38.9157	-76.7247	GBIF. 2026a. GBIF Occurrence Download.
Aedes japonicus	Non-native	America	38.952	-76.7056	GBIF. 2026a. GBIF Occurrence Download.
Aedes japonicus	Non-native	America	36.4371	-76.7014	GBIF. 2026a. GBIF Occurrence Download.
Aedes japonicus	Non-native	America	39.4627	-76.6956	GBIF. 2026a. GBIF Occurrence Download.
Aedes japonicus	Non-native	America	38.5648	-76.6848	GBIF. 2026a. GBIF Occurrence Download.
Aedes japonicus	Non-native	America	36.61	-76.662	GBIF. 2026a. GBIF Occurrence Download.
Aedes japonicus	Non-native	America	36.716	-76.655	GBIF. 2026a. GBIF Occurrence Download.
Aedes japonicus	Non-native	America	36.825	-76.642	GBIF. 2026a. GBIF Occurrence Download.
Aedes japonicus	Non-native	America	40.9738	-76.6235	GBIF. 2026a. GBIF Occurrence Download.
Aedes japonicus	Non-native	America	36.795	-76.622	GBIF. 2026a. GBIF Occurrence Download.
Aedes japonicus	Non-native	America	36.751	-76.618	GBIF. 2026a. GBIF Occurrence Download.
Aedes japonicus	Non-native	America	39.5782	-76.6145	GBIF. 2026a. GBIF Occurrence Download.
Aedes japonicus	Non-native	America	36.4414	-76.6107	GBIF. 2026a. GBIF Occurrence Download.
Aedes japonicus	Non-native	America	36.687	-76.606	GBIF. 2026a. GBIF Occurrence Download.
Aedes japonicus	Non-native	America	38.4905	-76.5919	GBIF. 2026a. GBIF Occurrence Download.
Aedes japonicus	Non-native	America	36.845	-76.586	GBIF. 2026a. GBIF Occurrence Download.
Aedes japonicus	Non-native	America	36.73	-76.585	GBIF. 2026a. GBIF Occurrence Download.
Aedes japonicus	Non-native	America	40.9695	-76.5801	GBIF. 2026a. GBIF Occurrence Download.
Aedes japonicus	Non-native	America	39.4024	-76.5792	GBIF. 2026a. GBIF Occurrence Download.
Aedes japonicus	Non-native	America	36.617	-76.579	GBIF. 2026a. GBIF Occurrence Download.
Aedes japonicus	Non-native	America	36.769	-76.571	GBIF. 2026a. GBIF Occurrence Download.
Aedes japonicus	Non-native	America	36.799	-76.571	GBIF. 2026a. GBIF Occurrence Download.
Aedes japonicus	Non-native	America	39.3355	-76.5698	GBIF. 2026a. GBIF Occurrence Download.
Aedes japonicus	Non-native	America	42.2828	-76.5696	GBIF. 2026a. GBIF Occurrence Download.
Aedes japonicus	Non-native	America	38.8879	-76.5642	GBIF. 2026a. GBIF Occurrence Download.
Aedes japonicus	Non-native	America	36.872	-76.55	GBIF. 2026a. GBIF Occurrence Download.
Aedes japonicus	Non-native	America	36.83	-76.539	GBIF. 2026a. GBIF Occurrence Download.
Aedes japonicus	Non-native	America	36.747	-76.538	GBIF. 2026a. GBIF Occurrence Download.
Aedes japonicus	Non-native	America	42.4319	-76.5329	GBIF. 2026a. GBIF Occurrence Download.
Aedes japonicus	Non-native	America	39.3711	-76.5256	GBIF. 2026a. GBIF Occurrence Download.
Aedes japonicus	Non-native	America	36.779	-76.523	GBIF. 2026a. GBIF Occurrence Download.
Aedes japonicus	Non-native	America	42.5405	-76.5223	GBIF. 2026a. GBIF Occurrence Download.
Aedes japonicus	Non-native	America	36.899	-76.51	GBIF. 2026a. GBIF Occurrence Download.
Aedes japonicus	Non-native	America	36.862	-76.502	GBIF. 2026a. GBIF Occurrence Download.
Aedes japonicus	Non-native	America	42.3851	-76.5005	GBIF. 2026a. GBIF Occurrence Download.
Aedes japonicus	Non-native	America	42.5932	-76.4956	GBIF. 2026a. GBIF Occurrence Download.
Aedes japonicus	Non-native	America	40.8228	-76.4932	GBIF. 2026a. GBIF Occurrence Download.
Aedes japonicus	Non-native	America	36.795	-76.49	GBIF. 2026a. GBIF Occurrence Download.
Aedes japonicus	Non-native	America	42.4492	-76.476	GBIF. 2026a. GBIF Occurrence Download.
Aedes japonicus	Non-native	America	36.82	-76.462	GBIF. 2026a. GBIF Occurrence Download.
Aedes japonicus	Non-native	America	36.875	-76.459	GBIF. 2026a. GBIF Occurrence Download.
Aedes japonicus	Non-native	America	42.4729	-76.4578	GBIF. 2026a. GBIF Occurrence Download.
Aedes japonicus	Non-native	America	42.5045	-76.4258	GBIF. 2026a. GBIF Occurrence Download.
Aedes japonicus	Non-native	America	36.885	-76.419	GBIF. 2026a. GBIF Occurrence Download.
Aedes japonicus	Non-native	America	42.3912	-76.3735	GBIF. 2026a. GBIF Occurrence Download.
Aedes japonicus	Non-native	America	42.9922	-76.3704	GBIF. 2026a. GBIF Occurrence Download.
Aedes japonicus	Non-native	America	42.9686	-76.348	GBIF. 2026a. GBIF Occurrence Download.
Aedes japonicus	Non-native	America	44.8493	-76.2043	GBIF. 2026a. GBIF Occurrence Download.
Aedes japonicus	Non-native	America	39.4161	-76.1991	GBIF. 2026a. GBIF Occurrence Download.
Aedes japonicus	Non-native	America	40.2792	-76.1923	GBIF. 2026a. GBIF Occurrence Download.
Aedes japonicus	Non-native	America	42.9313	-76.1814	GBIF. 2026a. GBIF Occurrence Download.
Aedes japonicus	Non-native	America	39.4737	-76.1811	GBIF. 2026a. GBIF Occurrence Download.
Aedes japonicus	Non-native	America	39.4606	-76.1439	GBIF. 2026a. GBIF Occurrence Download.
Aedes japonicus	Non-native	America	43.0303	-76.1375	GBIF. 2026a. GBIF Occurrence Download.
Aedes japonicus	Non-native	America	39.515	-76.1208	GBIF. 2026a. GBIF Occurrence Download.
Aedes japonicus	Non-native	America	39.5463	-76.1079	GBIF. 2026a. GBIF Occurrence Download.
Aedes japonicus	Non-native	America	43.0661	-76.1003	GBIF. 2026a. GBIF Occurrence Download.
Aedes japonicus	Non-native	America	40.3249	-76.0794	GBIF. 2026a. GBIF Occurrence Download.
Aedes japonicus	Non-native	America	40.2331	-76.0375	GBIF. 2026a. GBIF Occurrence Download.
Aedes japonicus	Non-native	America	38.7134	-76.0144	GBIF. 2026a. GBIF Occurrence Download.
Aedes japonicus	Non-native	America	40.247	-75.9981	GBIF. 2026a. GBIF Occurrence Download.
Aedes japonicus	Non-native	America	43.0513	-75.9972	GBIF. 2026a. GBIF Occurrence Download.
Aedes japonicus	Non-native	America	41.2187	-75.8417	GBIF. 2026a. GBIF Occurrence Download.
Aedes japonicus	Non-native	America	45.3446	-75.8244	GBIF. 2026a. GBIF Occurrence Download.
Aedes japonicus	Non-native	America	39.7058	-75.7933	GBIF. 2026a. GBIF Occurrence Download.
Aedes japonicus	Non-native	America	39.6638	-75.7452	GBIF. 2026a. GBIF Occurrence Download.
Aedes japonicus	Non-native	America	39.589	-75.7433	GBIF. 2026a. GBIF Occurrence Download.
Aedes japonicus	Non-native	America	39.2298	-75.7221	GBIF. 2026a. GBIF Occurrence Download.
Aedes japonicus	Non-native	America	39.2891	-75.6869	GBIF. 2026a. GBIF Occurrence Download.
Aedes japonicus	Non-native	America	43.1611	-75.6731	GBIF. 2026a. GBIF Occurrence Download.
Aedes japonicus	Non-native	America	41.4083	-75.6464	GBIF. 2026a. GBIF Occurrence Download.
Aedes japonicus	Non-native	America	42.8956	-75.6409	GBIF. 2026a. GBIF Occurrence Download.
Aedes japonicus	Non-native	America	39.768	-75.6032	GBIF. 2026a. GBIF Occurrence Download.
Aedes japonicus	Non-native	America	39.7194	-75.5953	GBIF. 2026a. GBIF Occurrence Download.
Aedes japonicus	Non-native	America	39.9388	-75.5928	GBIF. 2026a. GBIF Occurrence Download.
Aedes japonicus	Non-native	America	39.9751	-75.5753	GBIF. 2026a. GBIF Occurrence Download.
Aedes japonicus	Non-native	America	39.7567	-75.5503	GBIF. 2026a. GBIF Occurrence Download.
Aedes japonicus	Non-native	America	42.5392	-75.5243	GBIF. 2026a. GBIF Occurrence Download.
Aedes japonicus	Non-native	America	44.6995	-75.4938	GBIF. 2026a. GBIF Occurrence Download.
Aedes japonicus	Non-native	America	39.0114	-75.4835	GBIF. 2026a. GBIF Occurrence Download.
Aedes japonicus	Non-native	America	45.164	-75.4604	GBIF. 2026a. GBIF Occurrence Download.
Aedes japonicus	Non-native	America	40.6506	-75.3893	GBIF. 2026a. GBIF Occurrence Download.
Aedes japonicus	Non-native	America	40.7865	-75.3801	GBIF. 2026a. GBIF Occurrence Download.
Aedes japonicus	Non-native	America	38.6738	-75.3799	GBIF. 2026a. GBIF Occurrence Download.
Aedes japonicus	Non-native	America	38.7204	-75.3743	GBIF. 2026a. GBIF Occurrence Download.
Aedes japonicus	Non-native	America	40.0424	-75.3486	GBIF. 2026a. GBIF Occurrence Download.
Aedes japonicus	Non-native	America	40.7964	-75.2709	GBIF. 2026a. GBIF Occurrence Download.
Aedes japonicus	Non-native	America	40.0368	-75.222	GBIF. 2026a. GBIF Occurrence Download.
Aedes japonicus	Non-native	America	38.6709	-75.1746	GBIF. 2026a. GBIF Occurrence Download.
Aedes japonicus	Non-native	America	39.7517	-75.1592	GBIF. 2026a. GBIF Occurrence Download.
Aedes japonicus	Non-native	America	40.1979	-75.0975	GBIF. 2026a. GBIF Occurrence Download.
Aedes japonicus	Non-native	America	40.3287	-75.0673	GBIF. 2026a. GBIF Occurrence Download.
Aedes japonicus	Non-native	America	40.3017	-75.0356	GBIF. 2026a. GBIF Occurrence Download.
Aedes japonicus	Non-native	America	40.1186	-75.0257	GBIF. 2026a. GBIF Occurrence Download.
Aedes japonicus	Non-native	America	39.7095	-75.0248	GBIF. 2026a. GBIF Occurrence Download.
Aedes japonicus	Non-native	America	40.1449	-74.9947	GBIF. 2026a. GBIF Occurrence Download.
Aedes japonicus	Non-native	America	39.8293	-74.9918	GBIF. 2026a. GBIF Occurrence Download.
Aedes japonicus	Non-native	America	40.5089	-74.8224	GBIF. 2026a. GBIF Occurrence Download.
Aedes japonicus	Non-native	America	39.1716	-74.7606	GBIF. 2026a. GBIF Occurrence Download.
Aedes japonicus	Non-native	America	40.4191	-74.7176	GBIF. 2026a. GBIF Occurrence Download.
Aedes japonicus	Non-native	America	40.4447	-74.6721	GBIF. 2026a. GBIF Occurrence Download.
Aedes japonicus	Non-native	America	40.5844	-74.4494	GBIF. 2026a. GBIF Occurrence Download.
Aedes japonicus	Non-native	America	40.7721	-74.4478	GBIF. 2026a. GBIF Occurrence Download.
Aedes japonicus	Non-native	America	40.7239	-74.3072	GBIF. 2026a. GBIF Occurrence Download.
Aedes japonicus	Non-native	America	42.067	-74.2728	GBIF. 2026a. GBIF Occurrence Download.
Aedes japonicus	Non-native	America	40.5137	-74.2276	GBIF. 2026a. GBIF Occurrence Download.
Aedes japonicus	Non-native	America	40.3116	-74.2251	GBIF. 2026a. GBIF Occurrence Download.
Aedes japonicus	Non-native	America	40.58	-74.1243	GBIF. 2026a. GBIF Occurrence Download.
Aedes japonicus	Non-native	America	41.1302	-74.0849	GBIF. 2026a. GBIF Occurrence Download.
Aedes japonicus	Non-native	America	41.9262	-73.9837	GBIF. 2026a. GBIF Occurrence Download.
Aedes japonicus	Non-native	America	41.4979	-73.9622	GBIF. 2026a. GBIF Occurrence Download.
Aedes japonicus	Non-native	America	42.9385	-73.9184	GBIF. 2026a. GBIF Occurrence Download.
Aedes japonicus	Non-native	America	40.9097	-73.8932	GBIF. 2026a. GBIF Occurrence Download.
Aedes japonicus	Non-native	America	40.6538	-73.8756	GBIF. 2026a. GBIF Occurrence Download.
Aedes japonicus	Non-native	America	41.2183	-73.8698	GBIF. 2026a. GBIF Occurrence Download.
Aedes japonicus	Non-native	America	41.5781	-73.8655	GBIF. 2026a. GBIF Occurrence Download.
Aedes japonicus	Non-native	America	41.4131	-73.8651	GBIF. 2026a. GBIF Occurrence Download.
Aedes japonicus	Non-native	America	45.5093	-73.8058	GBIF. 2026a. GBIF Occurrence Download.
Aedes japonicus	Non-native	America	45.6299	-73.805	GBIF. 2026a. GBIF Occurrence Download.
Aedes japonicus	Non-native	America	41.8203	-73.7994	GBIF. 2026a. GBIF Occurrence Download.
Aedes japonicus	Non-native	America	41.9534	-73.7921	GBIF. 2026a. GBIF Occurrence Download.
Aedes japonicus	Non-native	America	43.0993	-73.7882	GBIF. 2026a. GBIF Occurrence Download.
Aedes japonicus	Non-native	America	41.3485	-73.7537	GBIF. 2026a. GBIF Occurrence Download.
Aedes japonicus	Non-native	America	45.4326	-73.7442	GBIF. 2026a. GBIF Occurrence Download.
Aedes japonicus	Non-native	America	40.7445	-73.7422	GBIF. 2026a. GBIF Occurrence Download.
Aedes japonicus	Non-native	America	41.05	-73.7035	GBIF. 2026a. GBIF Occurrence Download.
Aedes japonicus	Non-native	America	40.6731	-73.6488	GBIF. 2026a. GBIF Occurrence Download.
Aedes japonicus	Non-native	America	41.2212	-73.6432	GBIF. 2026a. GBIF Occurrence Download.
Aedes japonicus	Non-native	America	45.5549	-73.6392	GBIF. 2026a. GBIF Occurrence Download.
Aedes japonicus	Non-native	America	45.5956	-73.6073	GBIF. 2026a. GBIF Occurrence Download.
Aedes japonicus	Non-native	America	45.4427	-73.6059	GBIF. 2026a. GBIF Occurrence Download.
Aedes japonicus	Non-native	America	45.5063	-73.5902	GBIF. 2026a. GBIF Occurrence Download.
Aedes japonicus	Non-native	America	41.1342	-73.5874	GBIF. 2026a. GBIF Occurrence Download.
Aedes japonicus	Non-native	America	45.5926	-73.5672	GBIF. 2026a. GBIF Occurrence Download.
Aedes japonicus	Non-native	America	46.1627	-73.5603	GBIF. 2026a. GBIF Occurrence Download.
Aedes japonicus	Non-native	America	42.3874	-73.556	GBIF. 2026a. GBIF Occurrence Download.
Aedes japonicus	Non-native	America	41.1029	-73.5134	GBIF. 2026a. GBIF Occurrence Download.
Aedes japonicus	Non-native	America	44.683	-73.4746	GBIF. 2026a. GBIF Occurrence Download.
Aedes japonicus	Non-native	America	41.6819	-73.4675	GBIF. 2026a. GBIF Occurrence Download.
Aedes japonicus	Non-native	America	40.87	-73.45	GBIF. 2026a. GBIF Occurrence Download.
Aedes japonicus	Non-native	America	41.5376	-73.4374	GBIF. 2026a. GBIF Occurrence Download.
Aedes japonicus	Non-native	America	41.5756	-73.4266	GBIF. 2026a. GBIF Occurrence Download.
Aedes japonicus	Non-native	America	45.3925	-73.3842	GBIF. 2026a. GBIF Occurrence Download.
Aedes japonicus	Non-native	America	40.8952	-73.3821	GBIF. 2026a. GBIF Occurrence Download.
Aedes japonicus	Non-native	America	41.1303	-73.3542	GBIF. 2026a. GBIF Occurrence Download.
Aedes japonicus	Non-native	America	40.8779	-73.3466	GBIF. 2026a. GBIF Occurrence Download.
Aedes japonicus	Non-native	America	44.7133	-73.343	GBIF. 2026a. GBIF Occurrence Download.
Aedes japonicus	Non-native	America	41.5064	-73.2973	GBIF. 2026a. GBIF Occurrence Download.
Aedes japonicus	Non-native	America	41.2699	-73.2389	GBIF. 2026a. GBIF Occurrence Download.
Aedes japonicus	Non-native	America	41.2173	-73.2325	GBIF. 2026a. GBIF Occurrence Download.
Aedes japonicus	Non-native	America	42.7146	-73.2046	GBIF. 2026a. GBIF Occurrence Download.
Aedes japonicus	Non-native	America	42.6809	-73.2038	GBIF. 2026a. GBIF Occurrence Download.
Aedes japonicus	Non-native	America	44.4431	-73.1671	GBIF. 2026a. GBIF Occurrence Download.
Aedes japonicus	Non-native	America	44.5	-73.1501	GBIF. 2026a. GBIF Occurrence Download.
Aedes japonicus	Non-native	America	40.8345	-73.1305	GBIF. 2026a. GBIF Occurrence Download.
Aedes japonicus	Non-native	America	40.9132	-73.1196	GBIF. 2026a. GBIF Occurrence Download.
Aedes japonicus	Non-native	America	41.2797	-73.0569	GBIF. 2026a. GBIF Occurrence Download.
Aedes japonicus	Non-native	America	41.4126	-73.0488	GBIF. 2026a. GBIF Occurrence Download.
Aedes japonicus	Non-native	America	40.8398	-73.0453	GBIF. 2026a. GBIF Occurrence Download.
Aedes japonicus	Non-native	America	40.7576	-73.0402	GBIF. 2026a. GBIF Occurrence Download.
Aedes japonicus	Non-native	America	41.5505	-73.0332	GBIF. 2026a. GBIF Occurrence Download.
Aedes japonicus	Non-native	America	40.7821	-73.022	GBIF. 2026a. GBIF Occurrence Download.
Aedes japonicus	Non-native	America	44.4039	-72.991	GBIF. 2026a. GBIF Occurrence Download.
Aedes japonicus	Non-native	America	41.3284	-72.9724	GBIF. 2026a. GBIF Occurrence Download.
Aedes japonicus	Non-native	America	44.4848	-72.9617	GBIF. 2026a. GBIF Occurrence Download.
Aedes japonicus	Non-native	America	41.3469	-72.9024	GBIF. 2026a. GBIF Occurrence Download.
Aedes japonicus	Non-native	America	41.4307	-72.891	GBIF. 2026a. GBIF Occurrence Download.
Aedes japonicus	Non-native	America	41.7507	-72.8197	GBIF. 2026a. GBIF Occurrence Download.
Aedes japonicus	Non-native	America	41.8529	-72.759	GBIF. 2026a. GBIF Occurrence Download.
Aedes japonicus	Non-native	America	41.3181	-72.7367	GBIF. 2026a. GBIF Occurrence Download.
Aedes japonicus	Non-native	America	41.4322	-72.69	GBIF. 2026a. GBIF Occurrence Download.
Aedes japonicus	Non-native	America	46.3967	-72.6028	GBIF. 2026a. GBIF Occurrence Download.
Aedes japonicus	Non-native	America	42.6088	-72.5911	GBIF. 2026a. GBIF Occurrence Download.
Aedes japonicus	Non-native	America	42.3848	-72.571	GBIF. 2026a. GBIF Occurrence Download.
Aedes japonicus	Non-native	America	44.2595	-72.5674	GBIF. 2026a. GBIF Occurrence Download.
Aedes japonicus	Non-native	America	41.8008	-72.5552	GBIF. 2026a. GBIF Occurrence Download.
Aedes japonicus	Non-native	America	42.4367	-72.5225	GBIF. 2026a. GBIF Occurrence Download.
Aedes japonicus	Non-native	America	42.3989	-72.5209	GBIF. 2026a. GBIF Occurrence Download.
Aedes japonicus	Non-native	America	45.8718	-72.5059	GBIF. 2026a. GBIF Occurrence Download.
Aedes japonicus	Non-native	America	44.3295	-72.504	GBIF. 2026a. GBIF Occurrence Download.
Aedes japonicus	Non-native	America	44.3408	-72.4614	GBIF. 2026a. GBIF Occurrence Download.
Aedes japonicus	Non-native	America	42.3065	-72.4367	GBIF. 2026a. GBIF Occurrence Download.
Aedes japonicus	Non-native	America	42.9614	-72.3241	GBIF. 2026a. GBIF Occurrence Download.
Aedes japonicus	Non-native	America	41.7456	-72.3225	GBIF. 2026a. GBIF Occurrence Download.
Aedes japonicus	Non-native	America	43.6554	-72.3167	GBIF. 2026a. GBIF Occurrence Download.
Aedes japonicus	Non-native	America	45.3078	-72.3024	GBIF. 2026a. GBIF Occurrence Download.
Aedes japonicus	Non-native	America	42.427	-72.2297	GBIF. 2026a. GBIF Occurrence Download.
Aedes japonicus	Non-native	America	42.9042	-72.2079	GBIF. 2026a. GBIF Occurrence Download.
Aedes japonicus	Non-native	America	44.8097	-72.1989	GBIF. 2026a. GBIF Occurrence Download.
Aedes japonicus	Non-native	America	42.531	-72.189	GBIF. 2026a. GBIF Occurrence Download.
Aedes japonicus	Non-native	America	45.2625	-72.151	GBIF. 2026a. GBIF Occurrence Download.
Aedes japonicus	Non-native	America	43.5089	-72.1071	GBIF. 2026a. GBIF Occurrence Download.
Aedes japonicus	Non-native	America	45.376	-71.93	GBIF. 2026a. GBIF Occurrence Download.
Aedes japonicus	Non-native	America	45.4042	-71.8803	GBIF. 2026a. GBIF Occurrence Download.
Aedes japonicus	Non-native	America	42.2954	-71.8316	GBIF. 2026a. GBIF Occurrence Download.
Aedes japonicus	Non-native	America	41.7717	-71.7881	GBIF. 2026a. GBIF Occurrence Download.
Aedes japonicus	Non-native	America	41.367	-71.7853	GBIF. 2026a. GBIF Occurrence Download.
Aedes japonicus	Non-native	America	41.9252	-71.7816	GBIF. 2026a. GBIF Occurrence Download.
Aedes japonicus	Non-native	America	42.1549	-71.7628	GBIF. 2026a. GBIF Occurrence Download.
Aedes japonicus	Non-native	America	46.8967	-71.7417	GBIF. 2026a. GBIF Occurrence Download.
Aedes japonicus	Non-native	America	41.362	-71.6998	GBIF. 2026a. GBIF Occurrence Download.
Aedes japonicus	Non-native	America	41.4148	-71.6462	GBIF. 2026a. GBIF Occurrence Download.
Aedes japonicus	Non-native	America	42.0218	-71.6382	GBIF. 2026a. GBIF Occurrence Download.
Aedes japonicus	Non-native	America	42.364	-71.636	GBIF. 2026a. GBIF Occurrence Download.
Aedes japonicus	Non-native	America	42.6042	-71.6168	GBIF. 2026a. GBIF Occurrence Download.
Aedes japonicus	Non-native	America	41.8313	-71.6152	GBIF. 2026a. GBIF Occurrence Download.
Aedes japonicus	Non-native	America	42.2326	-71.5972	GBIF. 2026a. GBIF Occurrence Download.
Aedes japonicus	Non-native	America	41.474	-71.5751	GBIF. 2026a. GBIF Occurrence Download.
Aedes japonicus	Non-native	America	42.0095	-71.5745	GBIF. 2026a. GBIF Occurrence Download.
Aedes japonicus	Non-native	America	41.2001	-71.5724	GBIF. 2026a. GBIF Occurrence Download.
Aedes japonicus	Non-native	America	41.8295	-71.5378	GBIF. 2026a. GBIF Occurrence Download.
Aedes japonicus	Non-native	America	41.5449	-71.5359	GBIF. 2026a. GBIF Occurrence Download.
Aedes japonicus	Non-native	America	41.4734	-71.5116	GBIF. 2026a. GBIF Occurrence Download.
Aedes japonicus	Non-native	America	41.6965	-71.4875	GBIF. 2026a. GBIF Occurrence Download.
Aedes japonicus	Non-native	America	41.7265	-71.4875	GBIF. 2026a. GBIF Occurrence Download.
Aedes japonicus	Non-native	America	42.0247	-71.4823	GBIF. 2026a. GBIF Occurrence Download.
Aedes japonicus	Non-native	America	41.5469	-71.4674	GBIF. 2026a. GBIF Occurrence Download.
Aedes japonicus	Non-native	America	41.7933	-71.466	GBIF. 2026a. GBIF Occurrence Download.
Aedes japonicus	Non-native	America	42.0794	-71.4288	GBIF. 2026a. GBIF Occurrence Download.
Aedes japonicus	Non-native	America	41.7077	-71.414	GBIF. 2026a. GBIF Occurrence Download.
Aedes japonicus	Non-native	America	41.834	-71.4128	GBIF. 2026a. GBIF Occurrence Download.
Aedes japonicus	Non-native	America	41.8639	-71.4114	GBIF. 2026a. GBIF Occurrence Download.
Aedes japonicus	Non-native	America	41.8908	-71.4044	GBIF. 2026a. GBIF Occurrence Download.
Aedes japonicus	Non-native	America	42.146	-71.395	GBIF. 2026a. GBIF Occurrence Download.
Aedes japonicus	Non-native	America	42.175	-71.35	GBIF. 2026a. GBIF Occurrence Download.
Aedes japonicus	Non-native	America	41.7605	-71.3488	GBIF. 2026a. GBIF Occurrence Download.
Aedes japonicus	Non-native	America	41.7955	-71.3434	GBIF. 2026a. GBIF Occurrence Download.
Aedes japonicus	Non-native	America	42.0004	-71.3373	GBIF. 2026a. GBIF Occurrence Download.
Aedes japonicus	Non-native	America	42.142	-71.334	GBIF. 2026a. GBIF Occurrence Download.
Aedes japonicus	Non-native	America	42.0502	-71.3282	GBIF. 2026a. GBIF Occurrence Download.
Aedes japonicus	Non-native	America	41.4686	-71.3212	GBIF. 2026a. GBIF Occurrence Download.
Aedes japonicus	Non-native	America	43.1338	-71.3206	GBIF. 2026a. GBIF Occurrence Download.
Aedes japonicus	Non-native	America	42.6334	-71.3162	GBIF. 2026a. GBIF Occurrence Download.
Aedes japonicus	Non-native	America	42.17	-71.302	GBIF. 2026a. GBIF Occurrence Download.
Aedes japonicus	Non-native	America	42.4542	-71.2934	GBIF. 2026a. GBIF Occurrence Download.
Aedes japonicus	Non-native	America	42.246	-71.289	GBIF. 2026a. GBIF Occurrence Download.
Aedes japonicus	Non-native	America	41.6858	-71.2722	GBIF. 2026a. GBIF Occurrence Download.
Aedes japonicus	Non-native	America	41.6046	-71.2719	GBIF. 2026a. GBIF Occurrence Download.
Aedes japonicus	Non-native	America	46.7844	-71.2701	GBIF. 2026a. GBIF Occurrence Download.
Aedes japonicus	Non-native	America	42.3117	-71.2671	GBIF. 2026a. GBIF Occurrence Download.
Aedes japonicus	Non-native	America	41.7441	-71.2663	GBIF. 2026a. GBIF Occurrence Download.
Aedes japonicus	Non-native	America	42.3664	-71.2637	GBIF. 2026a. GBIF Occurrence Download.
Aedes japonicus	Non-native	America	42.0816	-71.2567	GBIF. 2026a. GBIF Occurrence Download.
Aedes japonicus	Non-native	America	42.128	-71.255	GBIF. 2026a. GBIF Occurrence Download.
Aedes japonicus	Non-native	America	41.6276	-71.2434	GBIF. 2026a. GBIF Occurrence Download.
Aedes japonicus	Non-native	America	42.3522	-71.227	GBIF. 2026a. GBIF Occurrence Download.
Aedes japonicus	Non-native	America	46.909	-71.2263	GBIF. 2026a. GBIF Occurrence Download.
Aedes japonicus	Non-native	America	42.231	-71.226	GBIF. 2026a. GBIF Occurrence Download.
Aedes japonicus	Non-native	America	42.1946	-71.2237	GBIF. 2026a. GBIF Occurrence Download.
Aedes japonicus	Non-native	America	42.691	-71.2226	GBIF. 2026a. GBIF Occurrence Download.
Aedes japonicus	Non-native	America	42.271	-71.221	GBIF. 2026a. GBIF Occurrence Download.
Aedes japonicus	Non-native	America	42.1245	-71.2061	GBIF. 2026a. GBIF Occurrence Download.
Aedes japonicus	Non-native	America	42.095	-71.199	GBIF. 2026a. GBIF Occurrence Download.
Aedes japonicus	Non-native	America	42.3872	-71.1966	GBIF. 2026a. GBIF Occurrence Download.
Aedes japonicus	Non-native	America	41.6555	-71.192	GBIF. 2026a. GBIF Occurrence Download.
Aedes japonicus	Non-native	America	41.613	-71.1869	GBIF. 2026a. GBIF Occurrence Download.
Aedes japonicus	Non-native	America	42.2455	-71.1711	GBIF. 2026a. GBIF Occurrence Download.
Aedes japonicus	Non-native	America	42.1545	-71.1495	GBIF. 2026a. GBIF Occurrence Download.
Aedes japonicus	Non-native	America	42.2222	-71.1207	GBIF. 2026a. GBIF Occurrence Download.
Aedes japonicus	Non-native	America	42.3865	-71.1084	GBIF. 2026a. GBIF Occurrence Download.
Aedes japonicus	Non-native	America	42.2559	-71.095	GBIF. 2026a. GBIF Occurrence Download.
Aedes japonicus	Non-native	America	42.1689	-71.0863	GBIF. 2026a. GBIF Occurrence Download.
Aedes japonicus	Non-native	America	42.4533	-71.0801	GBIF. 2026a. GBIF Occurrence Download.
Aedes japonicus	Non-native	America	42.2947	-71.0544	GBIF. 2026a. GBIF Occurrence Download.
Aedes japonicus	Non-native	America	42.122	-71.042	GBIF. 2026a. GBIF Occurrence Download.
Aedes japonicus	Non-native	America	42.4419	-71.0323	GBIF. 2026a. GBIF Occurrence Download.
Aedes japonicus	Non-native	America	42.1673	-71.0303	GBIF. 2026a. GBIF Occurrence Download.
Aedes japonicus	Non-native	America	42.2435	-71.0216	GBIF. 2026a. GBIF Occurrence Download.
Aedes japonicus	Non-native	America	42.193	-70.997	GBIF. 2026a. GBIF Occurrence Download.
Aedes japonicus	Non-native	America	42.259	-70.985	GBIF. 2026a. GBIF Occurrence Download.
Aedes japonicus	Non-native	America	42.173	-70.966	GBIF. 2026a. GBIF Occurrence Download.
Aedes japonicus	Non-native	America	43.1172	-70.9189	GBIF. 2026a. GBIF Occurrence Download.
Aedes japonicus	Non-native	America	43.1759	-70.8896	GBIF. 2026a. GBIF Occurrence Download.
Aedes japonicus	Non-native	America	43.2091	-70.8698	GBIF. 2026a. GBIF Occurrence Download.
Aedes japonicus	Non-native	America	42.643	-70.7014	GBIF. 2026a. GBIF Occurrence Download.
Aedes japonicus	Non-native	America	41.3782	-70.6621	GBIF. 2026a. GBIF Occurrence Download.
Aedes japonicus	Non-native	America	41.53	-70.65	GBIF. 2026a. GBIF Occurrence Download.
Aedes japonicus	Non-native	America	41.5641	-70.6152	GBIF. 2026a. GBIF Occurrence Download.
Aedes japonicus	Non-native	America	41.4176	-70.5878	GBIF. 2026a. GBIF Occurrence Download.
Aedes japonicus	Non-native	America	41.6634	-70.3616	GBIF. 2026a. GBIF Occurrence Download.
Aedes japonicus	Non-native	America	41.7366	-70.0453	GBIF. 2026a. GBIF Occurrence Download.
Aedes japonicus	Non-native	America	45.44	-69.0151	GBIF. 2026a. GBIF Occurrence Download.
Aedes japonicus	Non-native	America	44.6888	-68.8748	GBIF. 2026a. GBIF Occurrence Download.
Aedes japonicus	Non-native	America	44.8976	-68.6676	GBIF. 2026a. GBIF Occurrence Download.
Aedes japonicus	Non-native	America	44.6564	-68.662	GBIF. 2026a. GBIF Occurrence Download.
Aedes japonicus	Non-native	America	44.3084	-68.3687	GBIF. 2026a. GBIF Occurrence Download.
Aedes japonicus	Non-native	America	44.2522	-68.3673	GBIF. 2026a. GBIF Occurrence Download.
Aedes japonicus	Non-native	America	45.8863	-66.756	GBIF. 2026a. GBIF Occurrence Download.
Aedes japonicus	Non-native	America	45.8707	-66.6142	GBIF. 2026a. GBIF Occurrence Download.
Aedes japonicus	Non-native	America	45.3117	-66.1965	GBIF. 2026a. GBIF Occurrence Download.
Aedes japonicus	Non-native	America	45.5211	-65.8269	GBIF. 2026a. GBIF Occurrence Download.
Aedes japonicus	Non-native	America	43.4954	-65.5775	GBIF. 2026a. GBIF Occurrence Download.
Aedes japonicus	Non-native	America	46.2295	-64.5091	GBIF. 2026a. GBIF Occurrence Download.
Aedes japonicus	Non-native	America	45.0753	-64.4859	GBIF. 2026a. GBIF Occurrence Download.
Aedes japonicus	Non-native	America	45.0846	-64.3531	GBIF. 2026a. GBIF Occurrence Download.
Aedes japonicus	Non-native	America	44.6486	-63.7161	GBIF. 2026a. GBIF Occurrence Download.
Aedes japonicus	Non-native	America	44.6682	-63.6072	GBIF. 2026a. GBIF Occurrence Download.
Aedes japonicus	Non-native	America	44.6372	-63.5929	GBIF. 2026a. GBIF Occurrence Download.
Aedes japonicus	Non-native	America	44.6989	-63.5567	GBIF. 2026a. GBIF Occurrence Download.
Aedes japonicus	Non-native	America	44.671	-63.5546	GBIF. 2026a. GBIF Occurrence Download.
Aedes japonicus	Non-native	America	45.3726	-63.2671	GBIF. 2026a. GBIF Occurrence Download.
Aedes japonicus	Non-native	America	46.268	-63.1108	GBIF. 2026a. GBIF Occurrence Download.
Aedes japonicus	Non-native	America	45.6155	-61.9983	GBIF. 2026a. GBIF Occurrence Download.
Aedes japonicus	Non-native	America	46.2083	-60.3148	GBIF. 2026a. GBIF Occurrence Download.
Aedes japonicus	Non-native	America	46.1191	-60.2053	GBIF. 2026a. GBIF Occurrence Download.
Aedes japonicus	Non-native	America	46.2525	-60.0889	GBIF. 2026a. GBIF Occurrence Download.
Aedes japonicus	Non-native	Europe	47.5711	-52.7602	GBIF. 2026a. GBIF Occurrence Download.
Aedes japonicus	Non-native	Europe	43.2923	-5.9932	GBIF. 2026a. GBIF Occurrence Download.
Aedes japonicus	Non-native	Europe	43.3656	-5.98036	GBIF. 2026a. GBIF Occurrence Download.
Aedes japonicus	Non-native	Europe	43.4075	-5.97302	GBIF. 2026a. GBIF Occurrence Download.
Aedes japonicus	Non-native	Europe	43.379	-5.92022	GBIF. 2026a. GBIF Occurrence Download.
Aedes japonicus	Non-native	Europe	43.5385	-5.91152	GBIF. 2026a. GBIF Occurrence Download.
Aedes japonicus	Non-native	Europe	43.1604	-5.82688	GBIF. 2026a. GBIF Occurrence Download.
Aedes japonicus	Non-native	Europe	43.4185	-5.79188	GBIF. 2026a. GBIF Occurrence Download.
Aedes japonicus	Non-native	Europe	43.5293	-5.6785	GBIF. 2026a. GBIF Occurrence Download.
Aedes japonicus	Non-native	Europe	43.549	-5.63696	GBIF. 2026a. GBIF Occurrence Download.
Aedes japonicus	Non-native	Europe	43.5214	-5.61411	GBIF. 2026a. GBIF Occurrence Download.
Aedes japonicus	Non-native	Europe	43.3596	-5.60633	GBIF. 2026a. GBIF Occurrence Download.
Aedes japonicus	Non-native	Europe	43.2156	-5.56721	GBIF. 2026a. GBIF Occurrence Download.
Aedes japonicus	Non-native	Europe	43.4276	-5.4792	GBIF. 2026a. GBIF Occurrence Download.
Aedes japonicus	Non-native	Europe	43.5128	-5.37354	GBIF. 2026a. GBIF Occurrence Download.
Aedes japonicus	Non-native	Europe	43.3465	-5.35454	GBIF. 2026a. GBIF Occurrence Download.
Aedes japonicus	Non-native	Europe	43.3812	-5.35229	GBIF. 2026a. GBIF Occurrence Download.
Aedes japonicus	Non-native	Europe	43.3545	-5.08007	GBIF. 2026a. GBIF Occurrence Download.
Aedes japonicus	Non-native	Europe	43.4674	-5.07671	GBIF. 2026a. GBIF Occurrence Download.
Aedes japonicus	Non-native	Europe	43.4399	-5.06127	GBIF. 2026a. GBIF Occurrence Download.
Aedes japonicus	Non-native	Europe	43.362	-5.03613	GBIF. 2026a. GBIF Occurrence Download.
Aedes japonicus	Non-native	Europe	43.4325	-4.86024	GBIF. 2026a. GBIF Occurrence Download.
Aedes japonicus	Non-native	Europe	43.4068	-4.75827	GBIF. 2026a. GBIF Occurrence Download.
Aedes japonicus	Non-native	Europe	43.4007	-4.68622	GBIF. 2026a. GBIF Occurrence Download.
Aedes japonicus	Non-native	Europe	43.3821	-4.4023	GBIF. 2026a. GBIF Occurrence Download.
Aedes japonicus	Non-native	Europe	43.3153	-4.39208	GBIF. 2026a. GBIF Occurrence Download.
Aedes japonicus	Non-native	Europe	43.2968	-3.91058	GBIF. 2026a. GBIF Occurrence Download.
Aedes japonicus	Non-native	Europe	43.3128	-3.11937	GBIF. 2026a. GBIF Occurrence Download.
Aedes japonicus	Non-native	Europe	43.3015	-2.99571	GBIF. 2026a. GBIF Occurrence Download.
Aedes japonicus	Non-native	Europe	43.2211	-2.86907	GBIF. 2026a. GBIF Occurrence Download.
Aedes japonicus	Non-native	Europe	43.3585	-2.80889	GBIF. 2026a. GBIF Occurrence Download.
Aedes japonicus	Non-native	Europe	42.835	-2.72055	GBIF. 2026a. GBIF Occurrence Download.
Aedes japonicus	Non-native	Europe	43.1963	-2.45576	GBIF. 2026a. GBIF Occurrence Download.
Aedes japonicus	Non-native	Europe	43.1226	-2.4255	GBIF. 2026a. GBIF Occurrence Download.
Aedes japonicus	Non-native	Europe	43.2488	-2.39909	GBIF. 2026a. GBIF Occurrence Download.
Aedes japonicus	Non-native	Europe	43.1435	-2.19431	GBIF. 2026a. GBIF Occurrence Download.
Aedes japonicus	Non-native	Europe	43.2719	-2.12953	GBIF. 2026a. GBIF Occurrence Download.
Aedes japonicus	Non-native	Europe	43.1939	-2.11285	GBIF. 2026a. GBIF Occurrence Download.
Aedes japonicus	Non-native	Europe	43.2653	-2.02477	GBIF. 2026a. GBIF Occurrence Download.
Aedes japonicus	Non-native	Europe	43.2988	-2.01053	GBIF. 2026a. GBIF Occurrence Download.
Aedes japonicus	Non-native	Europe	42.8039	-1.66492	GBIF. 2026a. GBIF Occurrence Download.
Aedes japonicus	Non-native	Europe	42.6672	-1.64599	GBIF. 2026a. GBIF Occurrence Download.
Aedes japonicus	Non-native	Europe	42.93	-1.57153	GBIF. 2026a. GBIF Occurrence Download.
Aedes japonicus	Non-native	Europe	46.6424	2.19402	GBIF. 2026a. GBIF Occurrence Download.
Aedes japonicus	Non-native	Europe	50.6666	4.32435	GBIF. 2026a. GBIF Occurrence Download.
Aedes japonicus	Non-native	Europe	50.2557	4.8523	GBIF. 2026a. GBIF Occurrence Download.
Aedes japonicus	Non-native	Europe	50.3284	5.02877	GBIF. 2026a. GBIF Occurrence Download.
Aedes japonicus	Non-native	Europe	50.5933	5.44533	GBIF. 2026a. GBIF Occurrence Download.
Aedes japonicus	Non-native	Europe	52.529	5.463	GBIF. 2026a. GBIF Occurrence Download.
Aedes japonicus	Non-native	Europe	50.9038	5.47666	GBIF. 2026a. GBIF Occurrence Download.
Aedes japonicus	Non-native	Europe	49.5759	5.49227	GBIF. 2026a. GBIF Occurrence Download.
Aedes japonicus	Non-native	Europe	52.5503	5.51507	GBIF. 2026a. GBIF Occurrence Download.
Aedes japonicus	Non-native	Europe	50.936	5.55596	GBIF. 2026a. GBIF Occurrence Download.
Aedes japonicus	Non-native	Europe	50.6628	5.60016	GBIF. 2026a. GBIF Occurrence Download.
Aedes japonicus	Non-native	Europe	51.0363	5.63046	GBIF. 2026a. GBIF Occurrence Download.
Aedes japonicus	Non-native	Europe	50.8843	5.67775	GBIF. 2026a. GBIF Occurrence Download.
Aedes japonicus	Non-native	Europe	50.7806	5.68268	GBIF. 2026a. GBIF Occurrence Download.
Aedes japonicus	Non-native	Europe	51.0824	5.69485	GBIF. 2026a. GBIF Occurrence Download.
Aedes japonicus	Non-native	Europe	50.949	5.74855	GBIF. 2026a. GBIF Occurrence Download.
Aedes japonicus	Non-native	Europe	50.75	5.75	GBIF. 2026a. GBIF Occurrence Download.
Aedes japonicus	Non-native	Europe	50.85	5.75	GBIF. 2026a. GBIF Occurrence Download.
Aedes japonicus	Non-native	Europe	49.5425	5.82497	GBIF. 2026a. GBIF Occurrence Download.
Aedes japonicus	Non-native	Europe	49.5316	5.87467	GBIF. 2026a. GBIF Occurrence Download.
Aedes japonicus	Non-native	Europe	51.7877	5.92099	GBIF. 2026a. GBIF Occurrence Download.
Aedes japonicus	Non-native	Europe	51.2092	5.93385	GBIF. 2026a. GBIF Occurrence Download.
Aedes japonicus	Non-native	Europe	51.1269	5.95055	GBIF. 2026a. GBIF Occurrence Download.
Aedes japonicus	Non-native	Europe	49.6373	5.97056	GBIF. 2026a. GBIF Occurrence Download.
Aedes japonicus	Non-native	Europe	49.4808	5.98695	GBIF. 2026a. GBIF Occurrence Download.
Aedes japonicus	Non-native	Europe	49.9007	6.04071	GBIF. 2026a. GBIF Occurrence Download.
Aedes japonicus	Non-native	Europe	49.9347	6.07083	GBIF. 2026a. GBIF Occurrence Download.
Aedes japonicus	Non-native	Europe	50.6324	6.07321	GBIF. 2026a. GBIF Occurrence Download.
Aedes japonicus	Non-native	Europe	49.8136	6.0869	GBIF. 2026a. GBIF Occurrence Download.
Aedes japonicus	Non-native	Europe	47.6412	6.08724	GBIF. 2026a. GBIF Occurrence Download.
Aedes japonicus	Non-native	Europe	50.7197	6.09002	GBIF. 2026a. GBIF Occurrence Download.
Aedes japonicus	Non-native	Europe	49.4717	6.0919	GBIF. 2026a. GBIF Occurrence Download.
Aedes japonicus	Non-native	Europe	49.503	6.09206	GBIF. 2026a. GBIF Occurrence Download.
Aedes japonicus	Non-native	Europe	49.7768	6.09239	GBIF. 2026a. GBIF Occurrence Download.
Aedes japonicus	Non-native	Europe	49.5399	6.12549	GBIF. 2026a. GBIF Occurrence Download.
Aedes japonicus	Non-native	Europe	49.6113	6.12678	GBIF. 2026a. GBIF Occurrence Download.
Aedes japonicus	Non-native	Europe	49.6386	6.14469	GBIF. 2026a. GBIF Occurrence Download.
Aedes japonicus	Non-native	Europe	49.9604	6.15417	GBIF. 2026a. GBIF Occurrence Download.
Aedes japonicus	Non-native	Europe	49.8687	6.1606	GBIF. 2026a. GBIF Occurrence Download.
Aedes japonicus	Non-native	Europe	48.7887	6.16198	GBIF. 2026a. GBIF Occurrence Download.
Aedes japonicus	Non-native	Europe	51.1251	6.19079	GBIF. 2026a. GBIF Occurrence Download.
Aedes japonicus	Non-native	Europe	49.8733	6.2132	GBIF. 2026a. GBIF Occurrence Download.
Aedes japonicus	Non-native	Europe	49.9265	6.21802	GBIF. 2026a. GBIF Occurrence Download.
Aedes japonicus	Non-native	Europe	49.6797	6.25194	GBIF. 2026a. GBIF Occurrence Download.
Aedes japonicus	Non-native	Europe	50.9614	6.2574	GBIF. 2026a. GBIF Occurrence Download.
Aedes japonicus	Non-native	Europe	49.882	6.25866	GBIF. 2026a. GBIF Occurrence Download.
Aedes japonicus	Non-native	Europe	51.3356	6.28368	GBIF. 2026a. GBIF Occurrence Download.
Aedes japonicus	Non-native	Europe	49.7404	6.28625	GBIF. 2026a. GBIF Occurrence Download.
Aedes japonicus	Non-native	Europe	49.8528	6.33094	GBIF. 2026a. GBIF Occurrence Download.
Aedes japonicus	Non-native	Europe	49.5378	6.33304	GBIF. 2026a. GBIF Occurrence Download.
Aedes japonicus	Non-native	Europe	49.623	6.34775	GBIF. 2026a. GBIF Occurrence Download.
Aedes japonicus	Non-native	Europe	49.9872	6.3551	GBIF. 2026a. GBIF Occurrence Download.
Aedes japonicus	Non-native	Europe	49.5095	6.35697	GBIF. 2026a. GBIF Occurrence Download.
Aedes japonicus	Non-native	Europe	49.681	6.35871	GBIF. 2026a. GBIF Occurrence Download.
Aedes japonicus	Non-native	Europe	49.4482	6.3593	GBIF. 2026a. GBIF Occurrence Download.
Aedes japonicus	Non-native	Europe	47.1659	6.36273	GBIF. 2026a. GBIF Occurrence Download.
Aedes japonicus	Non-native	Europe	48.1962	6.38019	GBIF. 2026a. GBIF Occurrence Download.
Aedes japonicus	Non-native	Europe	49.7591	6.38513	GBIF. 2026a. GBIF Occurrence Download.
Aedes japonicus	Non-native	Europe	49.6329	6.39978	GBIF. 2026a. GBIF Occurrence Download.
Aedes japonicus	Non-native	Europe	49.8159	6.41756	GBIF. 2026a. GBIF Occurrence Download.
Aedes japonicus	Non-native	Europe	49.7072	6.42725	GBIF. 2026a. GBIF Occurrence Download.
Aedes japonicus	Non-native	Europe	49.6589	6.4347	GBIF. 2026a. GBIF Occurrence Download.
Aedes japonicus	Non-native	Europe	46.1353	6.46544	GBIF. 2026a. GBIF Occurrence Download.
Aedes japonicus	Non-native	Europe	49.7072	6.48473	GBIF. 2026a. GBIF Occurrence Download.
Aedes japonicus	Non-native	Europe	49.7843	6.49805	GBIF. 2026a. GBIF Occurrence Download.
Aedes japonicus	Non-native	Europe	49.705	6.538	GBIF. 2026a. GBIF Occurrence Download.
Aedes japonicus	Non-native	Europe	51.1899	6.54545	GBIF. 2026a. GBIF Occurrence Download.
Aedes japonicus	Non-native	Europe	51.4305	6.59582	GBIF. 2026a. GBIF Occurrence Download.
Aedes japonicus	Non-native	Europe	50.0052	6.60351	GBIF. 2026a. GBIF Occurrence Download.
Aedes japonicus	Non-native	Europe	49.4461	6.63671	GBIF. 2026a. GBIF Occurrence Download.
Aedes japonicus	Non-native	Europe	50.9601	6.63739	GBIF. 2026a. GBIF Occurrence Download.
Aedes japonicus	Non-native	Europe	49.0375	6.66131	GBIF. 2026a. GBIF Occurrence Download.
Aedes japonicus	Non-native	Europe	49.9739	6.67443	GBIF. 2026a. GBIF Occurrence Download.
Aedes japonicus	Non-native	Europe	49.9103	6.74399	GBIF. 2026a. GBIF Occurrence Download.
Aedes japonicus	Non-native	Europe	49.3181	6.74778	GBIF. 2026a. GBIF Occurrence Download.
Aedes japonicus	Non-native	Europe	51.2118	6.74878	GBIF. 2026a. GBIF Occurrence Download.
Aedes japonicus	Non-native	Europe	51.1754	6.76635	GBIF. 2026a. GBIF Occurrence Download.
Aedes japonicus	Non-native	Europe	47.9489	6.77388	GBIF. 2026a. GBIF Occurrence Download.
Aedes japonicus	Non-native	Europe	50.8249	6.80913	GBIF. 2026a. GBIF Occurrence Download.
Aedes japonicus	Non-native	Europe	48.4616	6.8474	GBIF. 2026a. GBIF Occurrence Download.
Aedes japonicus	Non-native	Europe	51.5525	6.84892	GBIF. 2026a. GBIF Occurrence Download.
Aedes japonicus	Non-native	Europe	52.15	6.85	GBIF. 2026a. GBIF Occurrence Download.
Aedes japonicus	Non-native	Europe	46.8318	6.85815	GBIF. 2026a. GBIF Occurrence Download.
Aedes japonicus	Non-native	Europe	47.6921	6.86021	GBIF. 2026a. GBIF Occurrence Download.
Aedes japonicus	Non-native	Europe	51.1837	6.87121	GBIF. 2026a. GBIF Occurrence Download.
Aedes japonicus	Non-native	Europe	47.6317	6.92858	GBIF. 2026a. GBIF Occurrence Download.
Aedes japonicus	Non-native	Europe	46.9999	6.94019	GBIF. 2026a. GBIF Occurrence Download.
Aedes japonicus	Non-native	Europe	49.3845	6.95312	GBIF. 2026a. GBIF Occurrence Download.
Aedes japonicus	Non-native	Europe	51.0834	6.96641	GBIF. 2026a. GBIF Occurrence Download.
Aedes japonicus	Non-native	Europe	49.91	7.01339	GBIF. 2026a. GBIF Occurrence Download.
Aedes japonicus	Non-native	Europe	47.8078	7.02844	GBIF. 2026a. GBIF Occurrence Download.
Aedes japonicus	Non-native	Europe	50.6896	7.03281	GBIF. 2026a. GBIF Occurrence Download.
Aedes japonicus	Non-native	Europe	51.0968	7.05534	GBIF. 2026a. GBIF Occurrence Download.
Aedes japonicus	Non-native	Europe	49.2404	7.06423	GBIF. 2026a. GBIF Occurrence Download.
Aedes japonicus	Non-native	Europe	46.2841	7.08621	GBIF. 2026a. GBIF Occurrence Download.
Aedes japonicus	Non-native	Europe	50.7133	7.09147	GBIF. 2026a. GBIF Occurrence Download.
Aedes japonicus	Non-native	Europe	51.1111	7.0947	GBIF. 2026a. GBIF Occurrence Download.
Aedes japonicus	Non-native	Europe	47.955	7.10518	GBIF. 2026a. GBIF Occurrence Download.
Aedes japonicus	Non-native	Europe	51.4838	7.10717	GBIF. 2026a. GBIF Occurrence Download.
Aedes japonicus	Non-native	Europe	51.2083	7.11871	GBIF. 2026a. GBIF Occurrence Download.
Aedes japonicus	Non-native	Europe	47.0928	7.14609	GBIF. 2026a. GBIF Occurrence Download.
Aedes japonicus	Non-native	Europe	47.8224	7.14655	GBIF. 2026a. GBIF Occurrence Download.
Aedes japonicus	Non-native	Europe	50.8093	7.14982	GBIF. 2026a. GBIF Occurrence Download.
Aedes japonicus	Non-native	Europe	50.9073	7.15193	GBIF. 2026a. GBIF Occurrence Download.
Aedes japonicus	Non-native	Europe	51.7357	7.16737	GBIF. 2026a. GBIF Occurrence Download.
Aedes japonicus	Non-native	Europe	50.5557	7.16988	GBIF. 2026a. GBIF Occurrence Download.
Aedes japonicus	Non-native	Europe	53.5996	7.17433	GBIF. 2026a. GBIF Occurrence Download.
Aedes japonicus	Non-native	Europe	51.1732	7.17744	GBIF. 2026a. GBIF Occurrence Download.
Aedes japonicus	Non-native	Europe	46.8509	7.198	GBIF. 2026a. GBIF Occurrence Download.
Aedes japonicus	Non-native	Europe	46.3432	7.20761	GBIF. 2026a. GBIF Occurrence Download.
Aedes japonicus	Non-native	Europe	49.3689	7.25268	GBIF. 2026a. GBIF Occurrence Download.
Aedes japonicus	Non-native	Europe	50.6938	7.2706	GBIF. 2026a. GBIF Occurrence Download.
Aedes japonicus	Non-native	Europe	47.8592	7.27402	GBIF. 2026a. GBIF Occurrence Download.
Aedes japonicus	Non-native	Europe	51.3077	7.29323	GBIF. 2026a. GBIF Occurrence Download.
Aedes japonicus	Non-native	Europe	51.4388	7.30421	GBIF. 2026a. GBIF Occurrence Download.
Aedes japonicus	Non-native	Europe	51.5987	7.30702	GBIF. 2026a. GBIF Occurrence Download.
Aedes japonicus	Non-native	Europe	47.6306	7.34417	GBIF. 2026a. GBIF Occurrence Download.
Aedes japonicus	Non-native	Europe	48.7228	7.37876	GBIF. 2026a. GBIF Occurrence Download.
Aedes japonicus	Non-native	Europe	50.6916	7.39626	GBIF. 2026a. GBIF Occurrence Download.
Aedes japonicus	Non-native	Europe	46.9542	7.40817	GBIF. 2026a. GBIF Occurrence Download.
Aedes japonicus	Non-native	Europe	51.9505	7.41634	GBIF. 2026a. GBIF Occurrence Download.
Aedes japonicus	Non-native	Europe	46.9017	7.42764	GBIF. 2026a. GBIF Occurrence Download.
Aedes japonicus	Non-native	Europe	48.4776	7.44799	GBIF. 2026a. GBIF Occurrence Download.
Aedes japonicus	Non-native	Europe	46.9674	7.44903	GBIF. 2026a. GBIF Occurrence Download.
Aedes japonicus	Non-native	Europe	51.4468	7.45859	GBIF. 2026a. GBIF Occurrence Download.
Aedes japonicus	Non-native	Europe	44.9866	7.47126	GBIF. 2026a. GBIF Occurrence Download.
Aedes japonicus	Non-native	Europe	46.9909	7.47639	GBIF. 2026a. GBIF Occurrence Download.
Aedes japonicus	Non-native	Europe	48.488	7.48718	GBIF. 2026a. GBIF Occurrence Download.
Aedes japonicus	Non-native	Europe	46.8669	7.49025	GBIF. 2026a. GBIF Occurrence Download.
Aedes japonicus	Non-native	Europe	53.2376	7.49855	GBIF. 2026a. GBIF Occurrence Download.
Aedes japonicus	Non-native	Europe	50.2523	7.50576	GBIF. 2026a. GBIF Occurrence Download.
Aedes japonicus	Non-native	Europe	45.3158	7.53398	GBIF. 2026a. GBIF Occurrence Download.
Aedes japonicus	Non-native	Europe	48.6714	7.5519	GBIF. 2026a. GBIF Occurrence Download.
Aedes japonicus	Non-native	Europe	47.7967	7.55261	GBIF. 2026a. GBIF Occurrence Download.
Aedes japonicus	Non-native	Europe	47.4251	7.57874	GBIF. 2026a. GBIF Occurrence Download.
Aedes japonicus	Non-native	Europe	48.0248	7.58764	GBIF. 2026a. GBIF Occurrence Download.
Aedes japonicus	Non-native	Europe	51.4763	7.58859	GBIF. 2026a. GBIF Occurrence Download.
Aedes japonicus	Non-native	Europe	47.0925	7.60147	GBIF. 2026a. GBIF Occurrence Download.
Aedes japonicus	Non-native	Europe	47.4996	7.61922	GBIF. 2026a. GBIF Occurrence Download.
Aedes japonicus	Non-native	Europe	48.5432	7.6212	GBIF. 2026a. GBIF Occurrence Download.
Aedes japonicus	Non-native	Europe	45.3308	7.62175	GBIF. 2026a. GBIF Occurrence Download.
Aedes japonicus	Non-native	Europe	47.2289	7.62275	GBIF. 2026a. GBIF Occurrence Download.
Aedes japonicus	Non-native	Europe	47.7149	7.63684	GBIF. 2026a. GBIF Occurrence Download.
Aedes japonicus	Non-native	Europe	51.441	7.64067	GBIF. 2026a. GBIF Occurrence Download.
Aedes japonicus	Non-native	Europe	47.583	7.66357	GBIF. 2026a. GBIF Occurrence Download.
Aedes japonicus	Non-native	Europe	52.2912	7.69733	GBIF. 2026a. GBIF Occurrence Download.
Aedes japonicus	Non-native	Europe	52.3343	7.71506	GBIF. 2026a. GBIF Occurrence Download.
Aedes japonicus	Non-native	Europe	47.5089	7.71649	GBIF. 2026a. GBIF Occurrence Download.
Aedes japonicus	Non-native	Europe	52.3079	7.74669	GBIF. 2026a. GBIF Occurrence Download.
Aedes japonicus	Non-native	Europe	48.64	7.75	GBIF. 2026a. GBIF Occurrence Download.
Aedes japonicus	Non-native	Europe	45.098	7.76468	GBIF. 2026a. GBIF Occurrence Download.
Aedes japonicus	Non-native	Europe	52.9427	7.77391	GBIF. 2026a. GBIF Occurrence Download.
Aedes japonicus	Non-native	Europe	47.9993	7.79595	GBIF. 2026a. GBIF Occurrence Download.
Aedes japonicus	Non-native	Europe	51.6616	7.80666	GBIF. 2026a. GBIF Occurrence Download.
Aedes japonicus	Non-native	Europe	47.3332	7.8217	GBIF. 2026a. GBIF Occurrence Download.
Aedes japonicus	Non-native	Europe	47.4306	7.82388	GBIF. 2026a. GBIF Occurrence Download.
Aedes japonicus	Non-native	Europe	47.3102	7.84734	GBIF. 2026a. GBIF Occurrence Download.
Aedes japonicus	Non-native	Europe	47.9949	7.86165	GBIF. 2026a. GBIF Occurrence Download.
Aedes japonicus	Non-native	Europe	45.1484	7.86659	GBIF. 2026a. GBIF Occurrence Download.
Aedes japonicus	Non-native	Europe	48.0369	7.88315	GBIF. 2026a. GBIF Occurrence Download.
Aedes japonicus	Non-native	Europe	47.3551	7.91361	GBIF. 2026a. GBIF Occurrence Download.
Aedes japonicus	Non-native	Europe	52.339	7.93013	GBIF. 2026a. GBIF Occurrence Download.
Aedes japonicus	Non-native	Europe	47.6142	7.96222	GBIF. 2026a. GBIF Occurrence Download.
Aedes japonicus	Non-native	Europe	49.9898	7.96852	GBIF. 2026a. GBIF Occurrence Download.
Aedes japonicus	Non-native	Europe	51.9301	7.97159	GBIF. 2026a. GBIF Occurrence Download.
Aedes japonicus	Non-native	Europe	45.4914	8.00267	GBIF. 2026a. GBIF Occurrence Download.
Aedes japonicus	Non-native	Europe	51.3161	8.00558	GBIF. 2026a. GBIF Occurrence Download.
Aedes japonicus	Non-native	Europe	45.5653	8.01058	GBIF. 2026a. GBIF Occurrence Download.
Aedes japonicus	Non-native	Europe	50.3717	8.01448	GBIF. 2026a. GBIF Occurrence Download.
Aedes japonicus	Non-native	Europe	47.4238	8.02669	GBIF. 2026a. GBIF Occurrence Download.
Aedes japonicus	Non-native	Europe	50.03	8.03	GBIF. 2026a. GBIF Occurrence Download.
Aedes japonicus	Non-native	Europe	47.3301	8.03098	GBIF. 2026a. GBIF Occurrence Download.
Aedes japonicus	Non-native	Europe	47.3962	8.03867	GBIF. 2026a. GBIF Occurrence Download.
Aedes japonicus	Non-native	Europe	52.2919	8.05521	GBIF. 2026a. GBIF Occurrence Download.
Aedes japonicus	Non-native	Europe	49.8804	8.06311	GBIF. 2026a. GBIF Occurrence Download.
Aedes japonicus	Non-native	Europe	49.9815	8.07746	GBIF. 2026a. GBIF Occurrence Download.
Aedes japonicus	Non-native	Europe	45.5425	8.08831	GBIF. 2026a. GBIF Occurrence Download.
Aedes japonicus	Non-native	Europe	49.7422	8.11193	GBIF. 2026a. GBIF Occurrence Download.
Aedes japonicus	Non-native	Europe	49.8337	8.11558	GBIF. 2026a. GBIF Occurrence Download.
Aedes japonicus	Non-native	Europe	50.0403	8.14744	GBIF. 2026a. GBIF Occurrence Download.
Aedes japonicus	Non-native	Europe	48.662	8.15618	GBIF. 2026a. GBIF Occurrence Download.
Aedes japonicus	Non-native	Europe	45.9852	8.1582	GBIF. 2026a. GBIF Occurrence Download.
Aedes japonicus	Non-native	Europe	44.9437	8.16914	GBIF. 2026a. GBIF Occurrence Download.
Aedes japonicus	Non-native	Europe	49.9889	8.17429	GBIF. 2026a. GBIF Occurrence Download.
Aedes japonicus	Non-native	Europe	53.1692	8.1753	GBIF. 2026a. GBIF Occurrence Download.
Aedes japonicus	Non-native	Europe	49.8643	8.19175	GBIF. 2026a. GBIF Occurrence Download.
Aedes japonicus	Non-native	Europe	45.5836	8.19472	GBIF. 2026a. GBIF Occurrence Download.
Aedes japonicus	Non-native	Europe	50.1526	8.20217	GBIF. 2026a. GBIF Occurrence Download.
Aedes japonicus	Non-native	Europe	45.5252	8.20952	GBIF. 2026a. GBIF Occurrence Download.
Aedes japonicus	Non-native	Europe	48.0271	8.22299	GBIF. 2026a. GBIF Occurrence Download.
Aedes japonicus	Non-native	Europe	47.1106	8.2338	GBIF. 2026a. GBIF Occurrence Download.
Aedes japonicus	Non-native	Europe	46.8942	8.2387	GBIF. 2026a. GBIF Occurrence Download.
Aedes japonicus	Non-native	Europe	50.0948	8.24711	GBIF. 2026a. GBIF Occurrence Download.
Aedes japonicus	Non-native	Europe	48.8607	8.25791	GBIF. 2026a. GBIF Occurrence Download.
Aedes japonicus	Non-native	Europe	47.0889	8.27311	GBIF. 2026a. GBIF Occurrence Download.
Aedes japonicus	Non-native	Europe	49.6387	8.3164	GBIF. 2026a. GBIF Occurrence Download.
Aedes japonicus	Non-native	Europe	46.223	8.32569	GBIF. 2026a. GBIF Occurrence Download.
Aedes japonicus	Non-native	Europe	50.0797	8.33308	GBIF. 2026a. GBIF Occurrence Download.
Aedes japonicus	Non-native	Europe	51.906	8.33591	GBIF. 2026a. GBIF Occurrence Download.
Aedes japonicus	Non-native	Europe	47.439	8.34747	GBIF. 2026a. GBIF Occurrence Download.
Aedes japonicus	Non-native	Europe	53.0486	8.35042	GBIF. 2026a. GBIF Occurrence Download.
Aedes japonicus	Non-native	Europe	45.6012	8.37172	GBIF. 2026a. GBIF Occurrence Download.
Aedes japonicus	Non-native	Europe	46.8213	8.4098	GBIF. 2026a. GBIF Occurrence Download.
Aedes japonicus	Non-native	Europe	46.9685	8.42097	GBIF. 2026a. GBIF Occurrence Download.
Aedes japonicus	Non-native	Europe	45.9334	8.42943	GBIF. 2026a. GBIF Occurrence Download.
Aedes japonicus	Non-native	Europe	47.3848	8.45366	GBIF. 2026a. GBIF Occurrence Download.
Aedes japonicus	Non-native	Europe	50.048	8.48647	GBIF. 2026a. GBIF Occurrence Download.
Aedes japonicus	Non-native	Europe	47.4096	8.49029	GBIF. 2026a. GBIF Occurrence Download.
Aedes japonicus	Non-native	Europe	48.4835	8.49137	GBIF. 2026a. GBIF Occurrence Download.
Aedes japonicus	Non-native	Europe	47.3622	8.49323	GBIF. 2026a. GBIF Occurrence Download.
Aedes japonicus	Non-native	Europe	47.171	8.53016	GBIF. 2026a. GBIF Occurrence Download.
Aedes japonicus	Non-native	Europe	48.3557	8.53077	GBIF. 2026a. GBIF Occurrence Download.
Aedes japonicus	Non-native	Europe	47.3398	8.53273	GBIF. 2026a. GBIF Occurrence Download.
Aedes japonicus	Non-native	Europe	52.0075	8.5329	GBIF. 2026a. GBIF Occurrence Download.
Aedes japonicus	Non-native	Europe	45.8811	8.53585	GBIF. 2026a. GBIF Occurrence Download.
Aedes japonicus	Non-native	Europe	45.931	8.54752	GBIF. 2026a. GBIF Occurrence Download.
Aedes japonicus	Non-native	Europe	45.5637	8.55386	GBIF. 2026a. GBIF Occurrence Download.
Aedes japonicus	Non-native	Europe	47.3019	8.55645	GBIF. 2026a. GBIF Occurrence Download.
Aedes japonicus	Non-native	Europe	49.1594	8.5681	GBIF. 2026a. GBIF Occurrence Download.
Aedes japonicus	Non-native	Europe	45.7326	8.57017	GBIF. 2026a. GBIF Occurrence Download.
Aedes japonicus	Non-native	Europe	47.4533	8.57211	GBIF. 2026a. GBIF Occurrence Download.
Aedes japonicus	Non-native	Europe	48.7754	8.57829	GBIF. 2026a. GBIF Occurrence Download.
Aedes japonicus	Non-native	Europe	48.9023	8.58027	GBIF. 2026a. GBIF Occurrence Download.
Aedes japonicus	Non-native	Europe	45.7135	8.59829	GBIF. 2026a. GBIF Occurrence Download.
Aedes japonicus	Non-native	Europe	50.5866	8.60388	GBIF. 2026a. GBIF Occurrence Download.
Aedes japonicus	Non-native	Europe	53.8642	8.60826	GBIF. 2026a. GBIF Occurrence Download.
Aedes japonicus	Non-native	Europe	49.7425	8.62482	GBIF. 2026a. GBIF Occurrence Download.
Aedes japonicus	Non-native	Europe	48.4704	8.62804	GBIF. 2026a. GBIF Occurrence Download.
Aedes japonicus	Non-native	Europe	46.8471	8.63203	GBIF. 2026a. GBIF Occurrence Download.
Aedes japonicus	Non-native	Europe	49.1592	8.63378	GBIF. 2026a. GBIF Occurrence Download.
Aedes japonicus	Non-native	Europe	49.42	8.64	GBIF. 2026a. GBIF Occurrence Download.
Aedes japonicus	Non-native	Europe	45.9943	8.64982	GBIF. 2026a. GBIF Occurrence Download.
Aedes japonicus	Non-native	Europe	47.7074	8.6535	GBIF. 2026a. GBIF Occurrence Download.
Aedes japonicus	Non-native	Europe	47.4131	8.65516	GBIF. 2026a. GBIF Occurrence Download.
Aedes japonicus	Non-native	Europe	47.0173	8.6598	GBIF. 2026a. GBIF Occurrence Download.
Aedes japonicus	Non-native	Europe	45.6469	8.66592	GBIF. 2026a. GBIF Occurrence Download.
Aedes japonicus	Non-native	Europe	46.5152	8.66768	GBIF. 2026a. GBIF Occurrence Download.
Aedes japonicus	Non-native	Europe	46.0213	8.67727	GBIF. 2026a. GBIF Occurrence Download.
Aedes japonicus	Non-native	Europe	49.0223	8.68107	GBIF. 2026a. GBIF Occurrence Download.
Aedes japonicus	Non-native	Europe	49.4366	8.68669	GBIF. 2026a. GBIF Occurrence Download.
Aedes japonicus	Non-native	Europe	47.2696	8.68774	GBIF. 2026a. GBIF Occurrence Download.
Aedes japonicus	Non-native	Europe	49.7164	8.69013	GBIF. 2026a. GBIF Occurrence Download.
Aedes japonicus	Non-native	Europe	50.6848	8.6919	GBIF. 2026a. GBIF Occurrence Download.
Aedes japonicus	Non-native	Europe	49.3864	8.69244	GBIF. 2026a. GBIF Occurrence Download.
Aedes japonicus	Non-native	Europe	49.4761	8.69327	GBIF. 2026a. GBIF Occurrence Download.
Aedes japonicus	Non-native	Europe	46.063	8.6952	GBIF. 2026a. GBIF Occurrence Download.
Aedes japonicus	Non-native	Europe	47.4486	8.70026	GBIF. 2026a. GBIF Occurrence Download.
Aedes japonicus	Non-native	Europe	49.3011	8.71368	GBIF. 2026a. GBIF Occurrence Download.
Aedes japonicus	Non-native	Europe	47.5267	8.73433	GBIF. 2026a. GBIF Occurrence Download.
Aedes japonicus	Non-native	Europe	49.415	8.7384	GBIF. 2026a. GBIF Occurrence Download.
Aedes japonicus	Non-native	Europe	50.6474	8.74629	GBIF. 2026a. GBIF Occurrence Download.
Aedes japonicus	Non-native	Europe	50.0824	8.76317	GBIF. 2026a. GBIF Occurrence Download.
Aedes japonicus	Non-native	Europe	47.1611	8.7806	GBIF. 2026a. GBIF Occurrence Download.
Aedes japonicus	Non-native	Europe	51.9397	8.78415	GBIF. 2026a. GBIF Occurrence Download.
Aedes japonicus	Non-native	Europe	46.352	8.78767	GBIF. 2026a. GBIF Occurrence Download.
Aedes japonicus	Non-native	Europe	48.874	8.79067	GBIF. 2026a. GBIF Occurrence Download.
Aedes japonicus	Non-native	Europe	46.2961	8.80849	GBIF. 2026a. GBIF Occurrence Download.
Aedes japonicus	Non-native	Europe	49.3908	8.83871	GBIF. 2026a. GBIF Occurrence Download.
Aedes japonicus	Non-native	Europe	49.144	8.90662	GBIF. 2026a. GBIF Occurrence Download.
Aedes japonicus	Non-native	Europe	47.5622	8.9153	GBIF. 2026a. GBIF Occurrence Download.
Aedes japonicus	Non-native	Europe	46.0527	8.9491	GBIF. 2026a. GBIF Occurrence Download.
Aedes japonicus	Non-native	Europe	48.9758	8.95389	GBIF. 2026a. GBIF Occurrence Download.
Aedes japonicus	Non-native	Europe	50.309	8.95432	GBIF. 2026a. GBIF Occurrence Download.
Aedes japonicus	Non-native	Europe	49.26	8.9838	GBIF. 2026a. GBIF Occurrence Download.
Aedes japonicus	Non-native	Europe	44.9831	8.994	GBIF. 2026a. GBIF Occurrence Download.
Aedes japonicus	Non-native	Europe	45.8406	9.00212	GBIF. 2026a. GBIF Occurrence Download.
Aedes japonicus	Non-native	Europe	48.8659	9.02693	GBIF. 2026a. GBIF Occurrence Download.
Aedes japonicus	Non-native	Europe	46.2098	9.02753	GBIF. 2026a. GBIF Occurrence Download.
Aedes japonicus	Non-native	Europe	47.461	9.09423	GBIF. 2026a. GBIF Occurrence Download.
Aedes japonicus	Non-native	Europe	47.4317	9.13453	GBIF. 2026a. GBIF Occurrence Download.
Aedes japonicus	Non-native	Europe	47.6356	9.14728	GBIF. 2026a. GBIF Occurrence Download.
Aedes japonicus	Non-native	Europe	48.7182	9.15257	GBIF. 2026a. GBIF Occurrence Download.
Aedes japonicus	Non-native	Europe	48.1916	9.16134	GBIF. 2026a. GBIF Occurrence Download.
Aedes japonicus	Non-native	Europe	49.2484	9.16172	GBIF. 2026a. GBIF Occurrence Download.
Aedes japonicus	Non-native	Europe	47.6855	9.16635	GBIF. 2026a. GBIF Occurrence Download.
Aedes japonicus	Non-native	Europe	49.081	9.19301	GBIF. 2026a. GBIF Occurrence Download.
Aedes japonicus	Non-native	Europe	48.2522	9.20043	GBIF. 2026a. GBIF Occurrence Download.
Aedes japonicus	Non-native	Europe	48.77	9.2012	GBIF. 2026a. GBIF Occurrence Download.
Aedes japonicus	Non-native	Europe	49.1469	9.21393	GBIF. 2026a. GBIF Occurrence Download.
Aedes japonicus	Non-native	Europe	48.9087	9.2148	GBIF. 2026a. GBIF Occurrence Download.
Aedes japonicus	Non-native	Europe	48.9353	9.25336	GBIF. 2026a. GBIF Occurrence Download.
Aedes japonicus	Non-native	Europe	49.3529	9.25454	GBIF. 2026a. GBIF Occurrence Download.
Aedes japonicus	Non-native	Europe	48.4912	9.26207	GBIF. 2026a. GBIF Occurrence Download.
Aedes japonicus	Non-native	Europe	48.7791	9.26406	GBIF. 2026a. GBIF Occurrence Download.
Aedes japonicus	Non-native	Europe	47.3817	9.26477	GBIF. 2026a. GBIF Occurrence Download.
Aedes japonicus	Non-native	Europe	48.6542	9.29438	GBIF. 2026a. GBIF Occurrence Download.
Aedes japonicus	Non-native	Europe	52.3958	9.35034	GBIF. 2026a. GBIF Occurrence Download.
Aedes japonicus	Non-native	Europe	47.4084	9.36511	GBIF. 2026a. GBIF Occurrence Download.
Aedes japonicus	Non-native	Europe	52.8089	9.39799	GBIF. 2026a. GBIF Occurrence Download.
Aedes japonicus	Non-native	Europe	47.671	9.42068	GBIF. 2026a. GBIF Occurrence Download.
Aedes japonicus	Non-native	Europe	46.9103	9.44985	GBIF. 2026a. GBIF Occurrence Download.
Aedes japonicus	Non-native	Europe	51.0536	9.45406	GBIF. 2026a. GBIF Occurrence Download.
Aedes japonicus	Non-native	Europe	48.5476	9.47333	GBIF. 2026a. GBIF Occurrence Download.
Aedes japonicus	Non-native	Europe	48.1319	9.5	GBIF. 2026a. GBIF Occurrence Download.
Aedes japonicus	Non-native	Europe	47.0109	9.51217	GBIF. 2026a. GBIF Occurrence Download.
Aedes japonicus	Non-native	Europe	48.7994	9.53756	GBIF. 2026a. GBIF Occurrence Download.
Aedes japonicus	Non-native	Europe	47.6369	9.54279	GBIF. 2026a. GBIF Occurrence Download.
Aedes japonicus	Non-native	Europe	47.1417	9.55295	GBIF. 2026a. GBIF Occurrence Download.
Aedes japonicus	Non-native	Europe	47.7027	9.56167	GBIF. 2026a. GBIF Occurrence Download.
Aedes japonicus	Non-native	Europe	47.219	9.57031	GBIF. 2026a. GBIF Occurrence Download.
Aedes japonicus	Non-native	Europe	47.251	9.59119	GBIF. 2026a. GBIF Occurrence Download.
Aedes japonicus	Non-native	Europe	47.4736	9.59471	GBIF. 2026a. GBIF Occurrence Download.
Aedes japonicus	Non-native	Europe	47.3299	9.60171	GBIF. 2026a. GBIF Occurrence Download.
Aedes japonicus	Non-native	Europe	47.2101	9.61231	GBIF. 2026a. GBIF Occurrence Download.
Aedes japonicus	Non-native	Europe	49.0163	9.62548	GBIF. 2026a. GBIF Occurrence Download.
Aedes japonicus	Non-native	Europe	47.2366	9.62904	GBIF. 2026a. GBIF Occurrence Download.
Aedes japonicus	Non-native	Europe	46.1668	9.63997	GBIF. 2026a. GBIF Occurrence Download.
Aedes japonicus	Non-native	Europe	47.2684	9.64391	GBIF. 2026a. GBIF Occurrence Download.
Aedes japonicus	Non-native	Europe	47.3013	9.64998	GBIF. 2026a. GBIF Occurrence Download.
Aedes japonicus	Non-native	Europe	47.4741	9.66132	GBIF. 2026a. GBIF Occurrence Download.
Aedes japonicus	Non-native	Europe	47.3412	9.66853	GBIF. 2026a. GBIF Occurrence Download.
Aedes japonicus	Non-native	Europe	47.3726	9.69448	GBIF. 2026a. GBIF Occurrence Download.
Aedes japonicus	Non-native	Europe	47.2899	9.70143	GBIF. 2026a. GBIF Occurrence Download.
Aedes japonicus	Non-native	Europe	47.458	9.73137	GBIF. 2026a. GBIF Occurrence Download.
Aedes japonicus	Non-native	Europe	45.738	9.73266	GBIF. 2026a. GBIF Occurrence Download.
Aedes japonicus	Non-native	Europe	47.4004	9.73326	GBIF. 2026a. GBIF Occurrence Download.
Aedes japonicus	Non-native	Europe	47.5037	9.73608	GBIF. 2026a. GBIF Occurrence Download.
Aedes japonicus	Non-native	Europe	47.5449	9.7408	GBIF. 2026a. GBIF Occurrence Download.
Aedes japonicus	Non-native	Europe	47.1993	9.74715	GBIF. 2026a. GBIF Occurrence Download.
Aedes japonicus	Non-native	Europe	47.1911	9.78738	GBIF. 2026a. GBIF Occurrence Download.
Aedes japonicus	Non-native	Europe	47.749	9.8233	GBIF. 2026a. GBIF Occurrence Download.
Aedes japonicus	Non-native	Europe	48.8117	9.83336	GBIF. 2026a. GBIF Occurrence Download.
Aedes japonicus	Non-native	Europe	49.8759	9.83654	GBIF. 2026a. GBIF Occurrence Download.
Aedes japonicus	Non-native	Europe	47.1544	9.83789	GBIF. 2026a. GBIF Occurrence Download.
Aedes japonicus	Non-native	Europe	47.1124	9.87125	GBIF. 2026a. GBIF Occurrence Download.
Aedes japonicus	Non-native	Europe	47.4538	9.87689	GBIF. 2026a. GBIF Occurrence Download.
Aedes japonicus	Non-native	Europe	50.3457	9.88195	GBIF. 2026a. GBIF Occurrence Download.
Aedes japonicus	Non-native	Europe	47.2417	9.89384	GBIF. 2026a. GBIF Occurrence Download.
Aedes japonicus	Non-native	Europe	50.1179	9.89655	GBIF. 2026a. GBIF Occurrence Download.
Aedes japonicus	Non-native	Europe	47.0782	9.90499	GBIF. 2026a. GBIF Occurrence Download.
Aedes japonicus	Non-native	Europe	47.1531	9.91874	GBIF. 2026a. GBIF Occurrence Download.
Aedes japonicus	Non-native	Europe	49.8002	9.93559	GBIF. 2026a. GBIF Occurrence Download.
Aedes japonicus	Non-native	Europe	50.0112	9.94755	GBIF. 2026a. GBIF Occurrence Download.
Aedes japonicus	Non-native	Europe	48.7562	9.9829	GBIF. 2026a. GBIF Occurrence Download.
Aedes japonicus	Non-native	Europe	48.2451	10.0767	GBIF. 2026a. GBIF Occurrence Download.
Aedes japonicus	Non-native	Europe	53.4836	10.0793	GBIF. 2026a. GBIF Occurrence Download.
Aedes japonicus	Non-native	Europe	48.8259	10.1005	GBIF. 2026a. GBIF Occurrence Download.
Aedes japonicus	Non-native	Europe	50.4428	10.1178	GBIF. 2026a. GBIF Occurrence Download.
Aedes japonicus	Non-native	Europe	48.3177	10.1415	GBIF. 2026a. GBIF Occurrence Download.
Aedes japonicus	Non-native	Europe	49.8713	10.2279	GBIF. 2026a. GBIF Occurrence Download.
Aedes japonicus	Non-native	Europe	52.0391	10.3471	GBIF. 2026a. GBIF Occurrence Download.
Aedes japonicus	Non-native	Europe	48.1622	10.519	GBIF. 2026a. GBIF Occurrence Download.
Aedes japonicus	Non-native	Europe	47.4927	10.5598	GBIF. 2026a. GBIF Occurrence Download.
Aedes japonicus	Non-native	Europe	46.9021	10.6349	GBIF. 2026a. GBIF Occurrence Download.
Aedes japonicus	Non-native	Europe	49.3636	10.6991	GBIF. 2026a. GBIF Occurrence Download.
Aedes japonicus	Non-native	Europe	51.0284	10.7671	GBIF. 2026a. GBIF Occurrence Download.
Aedes japonicus	Non-native	Europe	49.3482	10.7861	GBIF. 2026a. GBIF Occurrence Download.
Aedes japonicus	Non-native	Europe	48.1514	10.8264	GBIF. 2026a. GBIF Occurrence Download.
Aedes japonicus	Non-native	Europe	47.2852	11.0091	GBIF. 2026a. GBIF Occurrence Download.
Aedes japonicus	Non-native	Europe	50.9038	11.0248	GBIF. 2026a. GBIF Occurrence Download.
Aedes japonicus	Non-native	Europe	49.1957	11.0489	GBIF. 2026a. GBIF Occurrence Download.
Aedes japonicus	Non-native	Europe	47.3205	11.0882	GBIF. 2026a. GBIF Occurrence Download.
Aedes japonicus	Non-native	Europe	49.4189	11.1242	GBIF. 2026a. GBIF Occurrence Download.
Aedes japonicus	Non-native	Europe	47.274	11.2415	GBIF. 2026a. GBIF Occurrence Download.
Aedes japonicus	Non-native	Europe	50.7138	11.2478	GBIF. 2026a. GBIF Occurrence Download.
Aedes japonicus	Non-native	Europe	51.8442	11.269	GBIF. 2026a. GBIF Occurrence Download.
Aedes japonicus	Non-native	Europe	46.5021	11.3243	GBIF. 2026a. GBIF Occurrence Download.
Aedes japonicus	Non-native	Europe	48.8767	11.326	GBIF. 2026a. GBIF Occurrence Download.
Aedes japonicus	Non-native	Europe	47.2648	11.3406	GBIF. 2026a. GBIF Occurrence Download.
Aedes japonicus	Non-native	Europe	47.1523	11.3515	GBIF. 2026a. GBIF Occurrence Download.
Aedes japonicus	Non-native	Europe	48.1732	11.3604	GBIF. 2026a. GBIF Occurrence Download.
Aedes japonicus	Non-native	Europe	47.2869	11.3712	GBIF. 2026a. GBIF Occurrence Download.
Aedes japonicus	Non-native	Europe	50.051	11.3761	GBIF. 2026a. GBIF Occurrence Download.
Aedes japonicus	Non-native	Europe	47.1959	11.3973	GBIF. 2026a. GBIF Occurrence Download.
Aedes japonicus	Non-native	Europe	47.2606	11.398	GBIF. 2026a. GBIF Occurrence Download.
Aedes japonicus	Non-native	Europe	47.2862	11.4195	GBIF. 2026a. GBIF Occurrence Download.
Aedes japonicus	Non-native	Europe	47.2378	11.4219	GBIF. 2026a. GBIF Occurrence Download.
Aedes japonicus	Non-native	Europe	48.0838	11.4536	GBIF. 2026a. GBIF Occurrence Download.
Aedes japonicus	Non-native	Europe	45.7417	11.4553	GBIF. 2026a. GBIF Occurrence Download.
Aedes japonicus	Non-native	Europe	48.1733	11.4631	GBIF. 2026a. GBIF Occurrence Download.
Aedes japonicus	Non-native	Europe	48.2866	11.4652	GBIF. 2026a. GBIF Occurrence Download.
Aedes japonicus	Non-native	Europe	47.2639	11.4673	GBIF. 2026a. GBIF Occurrence Download.
Aedes japonicus	Non-native	Europe	47.2938	11.4707	GBIF. 2026a. GBIF Occurrence Download.
Aedes japonicus	Non-native	Europe	47.1946	11.5019	GBIF. 2026a. GBIF Occurrence Download.
Aedes japonicus	Non-native	Europe	48.1039	11.5051	GBIF. 2026a. GBIF Occurrence Download.
Aedes japonicus	Non-native	Europe	47.2542	11.5067	GBIF. 2026a. GBIF Occurrence Download.
Aedes japonicus	Non-native	Europe	47.3009	11.5116	GBIF. 2026a. GBIF Occurrence Download.
Aedes japonicus	Non-native	Europe	50.9309	11.5798	GBIF. 2026a. GBIF Occurrence Download.
Aedes japonicus	Non-native	Europe	48.4902	11.5925	GBIF. 2026a. GBIF Occurrence Download.
Aedes japonicus	Non-native	Europe	47.2876	11.5925	GBIF. 2026a. GBIF Occurrence Download.
Aedes japonicus	Non-native	Europe	46.3157	11.6016	GBIF. 2026a. GBIF Occurrence Download.
Aedes japonicus	Non-native	Europe	48.407	11.6049	GBIF. 2026a. GBIF Occurrence Download.
Aedes japonicus	Non-native	Europe	48.1186	11.6287	GBIF. 2026a. GBIF Occurrence Download.
Aedes japonicus	Non-native	Europe	47.3055	11.6487	GBIF. 2026a. GBIF Occurrence Download.
Aedes japonicus	Non-native	Europe	48.1042	11.693	GBIF. 2026a. GBIF Occurrence Download.
Aedes japonicus	Non-native	Europe	47.3569	11.6981	GBIF. 2026a. GBIF Occurrence Download.
Aedes japonicus	Non-native	Europe	52.0132	11.7007	GBIF. 2026a. GBIF Occurrence Download.
Aedes japonicus	Non-native	Europe	48.1012	11.7538	GBIF. 2026a. GBIF Occurrence Download.
Aedes japonicus	Non-native	Europe	48.524	11.7902	GBIF. 2026a. GBIF Occurrence Download.
Aedes japonicus	Non-native	Europe	50.9082	11.8	GBIF. 2026a. GBIF Occurrence Download.
Aedes japonicus	Non-native	Europe	47.3876	11.8007	GBIF. 2026a. GBIF Occurrence Download.
Aedes japonicus	Non-native	Europe	47.4096	11.8399	GBIF. 2026a. GBIF Occurrence Download.
Aedes japonicus	Non-native	Europe	48.9271	11.8613	GBIF. 2026a. GBIF Occurrence Download.
Aedes japonicus	Non-native	Europe	45.8549	11.8714	GBIF. 2026a. GBIF Occurrence Download.
Aedes japonicus	Non-native	Europe	45.8658	11.9144	GBIF. 2026a. GBIF Occurrence Download.
Aedes japonicus	Non-native	Europe	48.8971	11.9282	GBIF. 2026a. GBIF Occurrence Download.
Aedes japonicus	Non-native	Europe	47.4734	11.9842	GBIF. 2026a. GBIF Occurrence Download.
Aedes japonicus	Non-native	Europe	47.5172	12.0667	GBIF. 2026a. GBIF Occurrence Download.
Aedes japonicus	Non-native	Europe	49.0307	12.0975	GBIF. 2026a. GBIF Occurrence Download.
Aedes japonicus	Non-native	Europe	47.4918	12.1048	GBIF. 2026a. GBIF Occurrence Download.
Aedes japonicus	Non-native	Europe	49.3995	12.1169	GBIF. 2026a. GBIF Occurrence Download.
Aedes japonicus	Non-native	Europe	49.0324	12.1665	GBIF. 2026a. GBIF Occurrence Download.
Aedes japonicus	Non-native	Europe	45.9141	12.1683	GBIF. 2026a. GBIF Occurrence Download.
Aedes japonicus	Non-native	Europe	47.5836	12.1698	GBIF. 2026a. GBIF Occurrence Download.
Aedes japonicus	Non-native	Europe	46.1413	12.1746	GBIF. 2026a. GBIF Occurrence Download.
Aedes japonicus	Non-native	Europe	47.6174	12.1797	GBIF. 2026a. GBIF Occurrence Download.
Aedes japonicus	Non-native	Europe	49.074	12.1913	GBIF. 2026a. GBIF Occurrence Download.
Aedes japonicus	Non-native	Europe	47.4286	12.2064	GBIF. 2026a. GBIF Occurrence Download.
Aedes japonicus	Non-native	Europe	45.9787	12.2262	GBIF. 2026a. GBIF Occurrence Download.
Aedes japonicus	Non-native	Europe	48.4074	12.246	GBIF. 2026a. GBIF Occurrence Download.
Aedes japonicus	Non-native	Europe	45.6674	12.2687	GBIF. 2026a. GBIF Occurrence Download.
Aedes japonicus	Non-native	Europe	50.8896	12.2941	GBIF. 2026a. GBIF Occurrence Download.
Aedes japonicus	Non-native	Europe	46.0339	12.306	GBIF. 2026a. GBIF Occurrence Download.
Aedes japonicus	Non-native	Europe	47.7809	12.3215	GBIF. 2026a. GBIF Occurrence Download.
Aedes japonicus	Non-native	Europe	50.3152	12.3307	GBIF. 2026a. GBIF Occurrence Download.
Aedes japonicus	Non-native	Europe	46.2642	12.373	GBIF. 2026a. GBIF Occurrence Download.
Aedes japonicus	Non-native	Europe	50.8261	12.3878	GBIF. 2026a. GBIF Occurrence Download.
Aedes japonicus	Non-native	Europe	50.5122	12.3994	GBIF. 2026a. GBIF Occurrence Download.
Aedes japonicus	Non-native	Europe	47.5216	12.4284	GBIF. 2026a. GBIF Occurrence Download.
Aedes japonicus	Non-native	Europe	47.3897	12.4297	GBIF. 2026a. GBIF Occurrence Download.
Aedes japonicus	Non-native	Europe	46.2894	12.4367	GBIF. 2026a. GBIF Occurrence Download.
Aedes japonicus	Non-native	Europe	47.5543	12.4444	GBIF. 2026a. GBIF Occurrence Download.
Aedes japonicus	Non-native	Europe	46.2673	12.465	GBIF. 2026a. GBIF Occurrence Download.
Aedes japonicus	Non-native	Europe	47.8468	12.5356	GBIF. 2026a. GBIF Occurrence Download.
Aedes japonicus	Non-native	Europe	47.476	12.5485	GBIF. 2026a. GBIF Occurrence Download.
Aedes japonicus	Non-native	Europe	45.9603	12.5497	GBIF. 2026a. GBIF Occurrence Download.
Aedes japonicus	Non-native	Europe	46.1899	12.5604	GBIF. 2026a. GBIF Occurrence Download.
Aedes japonicus	Non-native	Europe	46.1999	12.6114	GBIF. 2026a. GBIF Occurrence Download.
Aedes japonicus	Non-native	Europe	51.3589	12.6745	GBIF. 2026a. GBIF Occurrence Download.
Aedes japonicus	Non-native	Europe	46.1609	12.6797	GBIF. 2026a. GBIF Occurrence Download.
Aedes japonicus	Non-native	Europe	46.1852	12.7455	GBIF. 2026a. GBIF Occurrence Download.
Aedes japonicus	Non-native	Europe	50.5633	12.7495	GBIF. 2026a. GBIF Occurrence Download.
Aedes japonicus	Non-native	Europe	46.8493	12.7591	GBIF. 2026a. GBIF Occurrence Download.
Aedes japonicus	Non-native	Europe	46.2605	12.7634	GBIF. 2026a. GBIF Occurrence Download.
Aedes japonicus	Non-native	Europe	48.7067	12.7865	GBIF. 2026a. GBIF Occurrence Download.
Aedes japonicus	Non-native	Europe	46.3105	12.7912	GBIF. 2026a. GBIF Occurrence Download.
Aedes japonicus	Non-native	Europe	50.7171	12.7927	GBIF. 2026a. GBIF Occurrence Download.
Aedes japonicus	Non-native	Europe	50.8294	12.8206	GBIF. 2026a. GBIF Occurrence Download.
Aedes japonicus	Non-native	Europe	50.4939	12.8231	GBIF. 2026a. GBIF Occurrence Download.
Aedes japonicus	Non-native	Europe	46.8297	12.8271	GBIF. 2026a. GBIF Occurrence Download.
Aedes japonicus	Non-native	Europe	46.1661	12.8326	GBIF. 2026a. GBIF Occurrence Download.
Aedes japonicus	Non-native	Europe	47.3865	12.8406	GBIF. 2026a. GBIF Occurrence Download.
Aedes japonicus	Non-native	Europe	48.0485	12.8447	GBIF. 2026a. GBIF Occurrence Download.
Aedes japonicus	Non-native	Europe	48.1473	12.8581	GBIF. 2026a. GBIF Occurrence Download.
Aedes japonicus	Non-native	Europe	47.2848	12.8587	GBIF. 2026a. GBIF Occurrence Download.
Aedes japonicus	Non-native	Europe	50.8738	12.8734	GBIF. 2026a. GBIF Occurrence Download.
Aedes japonicus	Non-native	Europe	46.2526	12.8932	GBIF. 2026a. GBIF Occurrence Download.
Aedes japonicus	Non-native	Europe	46.1986	12.9004	GBIF. 2026a. GBIF Occurrence Download.
Aedes japonicus	Non-native	Europe	46.2299	12.9153	GBIF. 2026a. GBIF Occurrence Download.
Aedes japonicus	Non-native	Europe	47.9826	12.9154	GBIF. 2026a. GBIF Occurrence Download.
Aedes japonicus	Non-native	Europe	51.1581	12.9278	GBIF. 2026a. GBIF Occurrence Download.
Aedes japonicus	Non-native	Europe	48.09	12.9322	GBIF. 2026a. GBIF Occurrence Download.
Aedes japonicus	Non-native	Europe	50.9153	12.9486	GBIF. 2026a. GBIF Occurrence Download.
Aedes japonicus	Non-native	Europe	47.8074	13.0012	GBIF. 2026a. GBIF Occurrence Download.
Aedes japonicus	Non-native	Europe	47.8471	13.0271	GBIF. 2026a. GBIF Occurrence Download.
Aedes japonicus	Non-native	Europe	48.2504	13.0299	GBIF. 2026a. GBIF Occurrence Download.
Aedes japonicus	Non-native	Europe	47.7763	13.0373	GBIF. 2026a. GBIF Occurrence Download.
Aedes japonicus	Non-native	Europe	47.8222	13.0494	GBIF. 2026a. GBIF Occurrence Download.
Aedes japonicus	Non-native	Europe	46.6703	13.0541	GBIF. 2026a. GBIF Occurrence Download.
Aedes japonicus	Non-native	Europe	47.3887	13.0843	GBIF. 2026a. GBIF Occurrence Download.
Aedes japonicus	Non-native	Europe	47.7717	13.0857	GBIF. 2026a. GBIF Occurrence Download.
Aedes japonicus	Non-native	Europe	47.316	13.0881	GBIF. 2026a. GBIF Occurrence Download.
Aedes japonicus	Non-native	Europe	47.9414	13.0893	GBIF. 2026a. GBIF Occurrence Download.
Aedes japonicus	Non-native	Europe	49.0208	13.1008	GBIF. 2026a. GBIF Occurrence Download.
Aedes japonicus	Non-native	Europe	48.1592	13.1054	GBIF. 2026a. GBIF Occurrence Download.
Aedes japonicus	Non-native	Europe	47.7058	13.1082	GBIF. 2026a. GBIF Occurrence Download.
Aedes japonicus	Non-native	Europe	47.8554	13.1147	GBIF. 2026a. GBIF Occurrence Download.
Aedes japonicus	Non-native	Europe	48.194	13.1285	GBIF. 2026a. GBIF Occurrence Download.
Aedes japonicus	Non-native	Europe	47.5973	13.1287	GBIF. 2026a. GBIF Occurrence Download.
Aedes japonicus	Non-native	Europe	46.2909	13.1295	GBIF. 2026a. GBIF Occurrence Download.
Aedes japonicus	Non-native	Europe	47.908	13.1936	GBIF. 2026a. GBIF Occurrence Download.
Aedes japonicus	Non-native	Europe	47.4727	13.1944	GBIF. 2026a. GBIF Occurrence Download.
Aedes japonicus	Non-native	Europe	47.3471	13.2009	GBIF. 2026a. GBIF Occurrence Download.
Aedes japonicus	Non-native	Europe	48.1387	13.2197	GBIF. 2026a. GBIF Occurrence Download.
Aedes japonicus	Non-native	Europe	47.9811	13.2556	GBIF. 2026a. GBIF Occurrence Download.
Aedes japonicus	Non-native	Europe	48.0302	13.2965	GBIF. 2026a. GBIF Occurrence Download.
Aedes japonicus	Non-native	Europe	47.7883	13.3071	GBIF. 2026a. GBIF Occurrence Download.
Aedes japonicus	Non-native	Europe	45.7704	13.3114	GBIF. 2026a. GBIF Occurrence Download.
Aedes japonicus	Non-native	Europe	46.6089	13.3437	GBIF. 2026a. GBIF Occurrence Download.
Aedes japonicus	Non-native	Europe	48.1525	13.3567	GBIF. 2026a. GBIF Occurrence Download.
Aedes japonicus	Non-native	Europe	47.4217	13.3833	GBIF. 2026a. GBIF Occurrence Download.
Aedes japonicus	Non-native	Europe	45.9184	13.4151	GBIF. 2026a. GBIF Occurrence Download.
Aedes japonicus	Non-native	Europe	50.3947	13.4295	GBIF. 2026a. GBIF Occurrence Download.
Aedes japonicus	Non-native	Europe	48.0132	13.4317	GBIF. 2026a. GBIF Occurrence Download.
Aedes japonicus	Non-native	Europe	47.7434	13.4387	GBIF. 2026a. GBIF Occurrence Download.
Aedes japonicus	Non-native	Europe	48.5886	13.4614	GBIF. 2026a. GBIF Occurrence Download.
Aedes japonicus	Non-native	Europe	48.4778	13.4845	GBIF. 2026a. GBIF Occurrence Download.
Aedes japonicus	Non-native	Europe	47.7263	13.4945	GBIF. 2026a. GBIF Occurrence Download.
Aedes japonicus	Non-native	Europe	45.9049	13.5102	GBIF. 2026a. GBIF Occurrence Download.
Aedes japonicus	Non-native	Europe	48.4245	13.5173	GBIF. 2026a. GBIF Occurrence Download.
Aedes japonicus	Non-native	Europe	51.0725	13.5253	GBIF. 2026a. GBIF Occurrence Download.
Aedes japonicus	Non-native	Europe	45.9353	13.5287	GBIF. 2026a. GBIF Occurrence Download.
Aedes japonicus	Non-native	Europe	47.5843	13.531	GBIF. 2026a. GBIF Occurrence Download.
Aedes japonicus	Non-native	Europe	46.9029	13.5371	GBIF. 2026a. GBIF Occurrence Download.
Aedes japonicus	Non-native	Europe	48.0415	13.5379	GBIF. 2026a. GBIF Occurrence Download.
Aedes japonicus	Non-native	Europe	48.4844	13.5615	GBIF. 2026a. GBIF Occurrence Download.
Aedes japonicus	Non-native	Europe	51.1219	13.5722	GBIF. 2026a. GBIF Occurrence Download.
Aedes japonicus	Non-native	Europe	47.9047	13.5743	GBIF. 2026a. GBIF Occurrence Download.
Aedes japonicus	Non-native	Europe	48.3717	13.5746	GBIF. 2026a. GBIF Occurrence Download.
Aedes japonicus	Non-native	Europe	45.8974	13.5837	GBIF. 2026a. GBIF Occurrence Download.
Aedes japonicus	Non-native	Europe	45.9817	13.5909	GBIF. 2026a. GBIF Occurrence Download.
Aedes japonicus	Non-native	Europe	48.2315	13.6036	GBIF. 2026a. GBIF Occurrence Download.
Aedes japonicus	Non-native	Europe	51.0431	13.6178	GBIF. 2026a. GBIF Occurrence Download.
Aedes japonicus	Non-native	Europe	46.7929	13.6232	GBIF. 2026a. GBIF Occurrence Download.
Aedes japonicus	Non-native	Europe	47.699	13.6246	GBIF. 2026a. GBIF Occurrence Download.
Aedes japonicus	Non-native	Europe	51.1144	13.636	GBIF. 2026a. GBIF Occurrence Download.
Aedes japonicus	Non-native	Europe	48.5544	13.6376	GBIF. 2026a. GBIF Occurrence Download.
Aedes japonicus	Non-native	Europe	48.1845	13.6395	GBIF. 2026a. GBIF Occurrence Download.
Aedes japonicus	Non-native	Europe	47.6155	13.6537	GBIF. 2026a. GBIF Occurrence Download.
Aedes japonicus	Non-native	Europe	48.0133	13.6546	GBIF. 2026a. GBIF Occurrence Download.
Aedes japonicus	Non-native	Europe	45.5391	13.6663	GBIF. 2026a. GBIF Occurrence Download.
Aedes japonicus	Non-native	Europe	46.5401	13.667	GBIF. 2026a. GBIF Occurrence Download.
Aedes japonicus	Non-native	Europe	47.3953	13.6843	GBIF. 2026a. GBIF Occurrence Download.
Aedes japonicus	Non-native	Europe	45.404	13.69	GBIF. 2026a. GBIF Occurrence Download.
Aedes japonicus	Non-native	Europe	45.438	13.705	GBIF. 2026a. GBIF Occurrence Download.
Aedes japonicus	Non-native	Europe	47.879	13.7092	GBIF. 2026a. GBIF Occurrence Download.
Aedes japonicus	Non-native	Europe	45.381	13.723	GBIF. 2026a. GBIF Occurrence Download.
Aedes japonicus	Non-native	Europe	48.1442	13.7309	GBIF. 2026a. GBIF Occurrence Download.
Aedes japonicus	Non-native	Europe	48.059	13.7539	GBIF. 2026a. GBIF Occurrence Download.
Aedes japonicus	Non-native	Europe	51.0297	13.7567	GBIF. 2026a. GBIF Occurrence Download.
Aedes japonicus	Non-native	Europe	51.0694	13.7617	GBIF. 2026a. GBIF Occurrence Download.
Aedes japonicus	Non-native	Europe	47.8543	13.7646	GBIF. 2026a. GBIF Occurrence Download.
Aedes japonicus	Non-native	Europe	45.352	13.772	GBIF. 2026a. GBIF Occurrence Download.
Aedes japonicus	Non-native	Europe	46.5506	13.7813	GBIF. 2026a. GBIF Occurrence Download.
Aedes japonicus	Non-native	Europe	47.931	13.7823	GBIF. 2026a. GBIF Occurrence Download.
Aedes japonicus	Non-native	Europe	51.1286	13.7892	GBIF. 2026a. GBIF Occurrence Download.
Aedes japonicus	Non-native	Europe	45.406	13.795	GBIF. 2026a. GBIF Occurrence Download.
Aedes japonicus	Non-native	Europe	47.8032	13.8001	GBIF. 2026a. GBIF Occurrence Download.
Aedes japonicus	Non-native	Europe	47.9671	13.8166	GBIF. 2026a. GBIF Occurrence Download.
Aedes japonicus	Non-native	Europe	48.0249	13.8225	GBIF. 2026a. GBIF Occurrence Download.
Aedes japonicus	Non-native	Europe	48.234	13.8258	GBIF. 2026a. GBIF Occurrence Download.
Aedes japonicus	Non-native	Europe	48.0994	13.8328	GBIF. 2026a. GBIF Occurrence Download.
Aedes japonicus	Non-native	Europe	46.6283	13.8378	GBIF. 2026a. GBIF Occurrence Download.
Aedes japonicus	Non-native	Europe	51.1275	13.8431	GBIF. 2026a. GBIF Occurrence Download.
Aedes japonicus	Non-native	Europe	48.3243	13.8472	GBIF. 2026a. GBIF Occurrence Download.
Aedes japonicus	Non-native	Europe	51.0172	13.8661	GBIF. 2026a. GBIF Occurrence Download.
Aedes japonicus	Non-native	Europe	47.1417	13.8671	GBIF. 2026a. GBIF Occurrence Download.
Aedes japonicus	Non-native	Europe	46.7275	13.8714	GBIF. 2026a. GBIF Occurrence Download.
Aedes japonicus	Non-native	Europe	45.6224	13.8827	GBIF. 2026a. GBIF Occurrence Download.
Aedes japonicus	Non-native	Europe	48.4979	13.8906	GBIF. 2026a. GBIF Occurrence Download.
Aedes japonicus	Non-native	Europe	45.1996	13.8921	GBIF. 2026a. GBIF Occurrence Download.
Aedes japonicus	Non-native	Europe	48.1822	13.8968	GBIF. 2026a. GBIF Occurrence Download.
Aedes japonicus	Non-native	Europe	47.9565	13.9019	GBIF. 2026a. GBIF Occurrence Download.
Aedes japonicus	Non-native	Europe	49.3125	13.9091	GBIF. 2026a. GBIF Occurrence Download.
Aedes japonicus	Non-native	Europe	48.6811	13.9098	GBIF. 2026a. GBIF Occurrence Download.
Aedes japonicus	Non-native	Europe	48.4033	13.9165	GBIF. 2026a. GBIF Occurrence Download.
Aedes japonicus	Non-native	Europe	46.774	13.9175	GBIF. 2026a. GBIF Occurrence Download.
Aedes japonicus	Non-native	Europe	48.2322	13.9187	GBIF. 2026a. GBIF Occurrence Download.
Aedes japonicus	Non-native	Europe	48.0028	13.92	GBIF. 2026a. GBIF Occurrence Download.
Aedes japonicus	Non-native	Europe	48.1276	13.9382	GBIF. 2026a. GBIF Occurrence Download.
Aedes japonicus	Non-native	Europe	47.8865	13.9386	GBIF. 2026a. GBIF Occurrence Download.
Aedes japonicus	Non-native	Europe	46.4613	13.9391	GBIF. 2026a. GBIF Occurrence Download.
Aedes japonicus	Non-native	Europe	50.7029	13.9469	GBIF. 2026a. GBIF Occurrence Download.
Aedes japonicus	Non-native	Europe	48.0981	13.9576	GBIF. 2026a. GBIF Occurrence Download.
Aedes japonicus	Non-native	Europe	47.8505	13.9598	GBIF. 2026a. GBIF Occurrence Download.
Aedes japonicus	Non-native	Europe	48.0389	13.9706	GBIF. 2026a. GBIF Occurrence Download.
Aedes japonicus	Non-native	Europe	48.6575	13.9766	GBIF. 2026a. GBIF Occurrence Download.
Aedes japonicus	Non-native	Europe	46.6272	13.9851	GBIF. 2026a. GBIF Occurrence Download.
Aedes japonicus	Non-native	Europe	48.453	13.9872	GBIF. 2026a. GBIF Occurrence Download.
Aedes japonicus	Non-native	Europe	49.008	13.992	GBIF. 2026a. GBIF Occurrence Download.
Aedes japonicus	Non-native	Europe	48.4821	13.9933	GBIF. 2026a. GBIF Occurrence Download.
Aedes japonicus	Non-native	Europe	48.6878	13.9977	GBIF. 2026a. GBIF Occurrence Download.
Aedes japonicus	Non-native	Europe	48.3725	14.0008	GBIF. 2026a. GBIF Occurrence Download.
Aedes japonicus	Non-native	Europe	48.155	14.0085	GBIF. 2026a. GBIF Occurrence Download.
Aedes japonicus	Non-native	Europe	46.6923	14.0145	GBIF. 2026a. GBIF Occurrence Download.
Aedes japonicus	Non-native	Europe	47.9282	14.0769	GBIF. 2026a. GBIF Occurrence Download.
Aedes japonicus	Non-native	Europe	48.2781	14.0976	GBIF. 2026a. GBIF Occurrence Download.
Aedes japonicus	Non-native	Europe	48.1903	14.1101	GBIF. 2026a. GBIF Occurrence Download.
Aedes japonicus	Non-native	Europe	46.3038	14.1392	GBIF. 2026a. GBIF Occurrence Download.
Aedes japonicus	Non-native	Europe	51.1708	14.1393	GBIF. 2026a. GBIF Occurrence Download.
Aedes japonicus	Non-native	Europe	48.3437	14.1443	GBIF. 2026a. GBIF Occurrence Download.
Aedes japonicus	Non-native	Europe	48.4237	14.1498	GBIF. 2026a. GBIF Occurrence Download.
Aedes japonicus	Non-native	Europe	46.58	14.1515	GBIF. 2026a. GBIF Occurrence Download.
Aedes japonicus	Non-native	Europe	48.2827	14.1534	GBIF. 2026a. GBIF Occurrence Download.
Aedes japonicus	Non-native	Europe	48.185	14.1783	GBIF. 2026a. GBIF Occurrence Download.
Aedes japonicus	Non-native	Europe	48.1144	14.1919	GBIF. 2026a. GBIF Occurrence Download.
Aedes japonicus	Non-native	Europe	48.2397	14.1936	GBIF. 2026a. GBIF Occurrence Download.
Aedes japonicus	Non-native	Europe	45.7727	14.2064	GBIF. 2026a. GBIF Occurrence Download.
Aedes japonicus	Non-native	Europe	47.5396	14.2141	GBIF. 2026a. GBIF Occurrence Download.
Aedes japonicus	Non-native	Europe	48.1426	14.2232	GBIF. 2026a. GBIF Occurrence Download.
Aedes japonicus	Non-native	Europe	48.4603	14.2252	GBIF. 2026a. GBIF Occurrence Download.
Aedes japonicus	Non-native	Europe	48.2197	14.2362	GBIF. 2026a. GBIF Occurrence Download.
Aedes japonicus	Non-native	Europe	48.2741	14.2386	GBIF. 2026a. GBIF Occurrence Download.
Aedes japonicus	Non-native	Europe	46.8621	14.2392	GBIF. 2026a. GBIF Occurrence Download.
Aedes japonicus	Non-native	Europe	45.5691	14.2447	GBIF. 2026a. GBIF Occurrence Download.
Aedes japonicus	Non-native	Europe	48.3155	14.2586	GBIF. 2026a. GBIF Occurrence Download.
Aedes japonicus	Non-native	Europe	48.3647	14.2611	GBIF. 2026a. GBIF Occurrence Download.
Aedes japonicus	Non-native	Europe	47.895	14.2646	GBIF. 2026a. GBIF Occurrence Download.
Aedes japonicus	Non-native	Europe	48.2389	14.2658	GBIF. 2026a. GBIF Occurrence Download.
Aedes japonicus	Non-native	Europe	48.0913	14.2707	GBIF. 2026a. GBIF Occurrence Download.
Aedes japonicus	Non-native	Europe	46.7589	14.2733	GBIF. 2026a. GBIF Occurrence Download.
Aedes japonicus	Non-native	Europe	46.6493	14.2763	GBIF. 2026a. GBIF Occurrence Download.
Aedes japonicus	Non-native	Europe	48.1502	14.2796	GBIF. 2026a. GBIF Occurrence Download.
Aedes japonicus	Non-native	Europe	48.2675	14.2807	GBIF. 2026a. GBIF Occurrence Download.
Aedes japonicus	Non-native	Europe	48.2122	14.2836	GBIF. 2026a. GBIF Occurrence Download.
Aedes japonicus	Non-native	Europe	45.9596	14.2898	GBIF. 2026a. GBIF Occurrence Download.
Aedes japonicus	Non-native	Europe	48.334	14.2922	GBIF. 2026a. GBIF Occurrence Download.
Aedes japonicus	Non-native	Europe	47.9778	14.2923	GBIF. 2026a. GBIF Occurrence Download.
Aedes japonicus	Non-native	Europe	48.2991	14.296	GBIF. 2026a. GBIF Occurrence Download.
Aedes japonicus	Non-native	Europe	45.6881	14.3063	GBIF. 2026a. GBIF Occurrence Download.
Aedes japonicus	Non-native	Europe	46.1699	14.3068	GBIF. 2026a. GBIF Occurrence Download.
Aedes japonicus	Non-native	Europe	48.82	14.313	GBIF. 2026a. GBIF Occurrence Download.
Aedes japonicus	Non-native	Europe	48.2463	14.3148	GBIF. 2026a. GBIF Occurrence Download.
Aedes japonicus	Non-native	Europe	46.6037	14.3163	GBIF. 2026a. GBIF Occurrence Download.
Aedes japonicus	Non-native	Europe	48.1604	14.3287	GBIF. 2026a. GBIF Occurrence Download.
Aedes japonicus	Non-native	Europe	48.3332	14.3426	GBIF. 2026a. GBIF Occurrence Download.
Aedes japonicus	Non-native	Europe	47.7192	14.3447	GBIF. 2026a. GBIF Occurrence Download.
Aedes japonicus	Non-native	Europe	48.2918	14.3461	GBIF. 2026a. GBIF Occurrence Download.
Aedes japonicus	Non-native	Europe	46.685	14.3474	GBIF. 2026a. GBIF Occurrence Download.
Aedes japonicus	Non-native	Europe	45.7898	14.3614	GBIF. 2026a. GBIF Occurrence Download.
Aedes japonicus	Non-native	Europe	46.7614	14.3624	GBIF. 2026a. GBIF Occurrence Download.
Aedes japonicus	Non-native	Europe	48.4995	14.369	GBIF. 2026a. GBIF Occurrence Download.
Aedes japonicus	Non-native	Europe	48.2048	14.3716	GBIF. 2026a. GBIF Occurrence Download.
Aedes japonicus	Non-native	Europe	47.5271	14.376	GBIF. 2026a. GBIF Occurrence Download.
Aedes japonicus	Non-native	Europe	48.2513	14.3825	GBIF. 2026a. GBIF Occurrence Download.
Aedes japonicus	Non-native	Europe	45.4305	14.3919	GBIF. 2026a. GBIF Occurrence Download.
Aedes japonicus	Non-native	Europe	45.9567	14.4064	GBIF. 2026a. GBIF Occurrence Download.
Aedes japonicus	Non-native	Europe	46.024	14.4073	GBIF. 2026a. GBIF Occurrence Download.
Aedes japonicus	Non-native	Europe	48.0665	14.4162	GBIF. 2026a. GBIF Occurrence Download.
Aedes japonicus	Non-native	Europe	46.6731	14.418	GBIF. 2026a. GBIF Occurrence Download.
Aedes japonicus	Non-native	Europe	48.3598	14.421	GBIF. 2026a. GBIF Occurrence Download.
Aedes japonicus	Non-native	Europe	48.0308	14.4272	GBIF. 2026a. GBIF Occurrence Download.
Aedes japonicus	Non-native	Europe	46.6401	14.4353	GBIF. 2026a. GBIF Occurrence Download.
Aedes japonicus	Non-native	Europe	45.8904	14.4399	GBIF. 2026a. GBIF Occurrence Download.
Aedes japonicus	Non-native	Europe	46.8493	14.4501	GBIF. 2026a. GBIF Occurrence Download.
Aedes japonicus	Non-native	Europe	45.3272	14.4527	GBIF. 2026a. GBIF Occurrence Download.
Aedes japonicus	Non-native	Europe	47.5674	14.4632	GBIF. 2026a. GBIF Occurrence Download.
Aedes japonicus	Non-native	Europe	48.3458	14.4729	GBIF. 2026a. GBIF Occurrence Download.
Aedes japonicus	Non-native	Europe	46.8753	14.4748	GBIF. 2026a. GBIF Occurrence Download.
Aedes japonicus	Non-native	Europe	48.5031	14.4995	GBIF. 2026a. GBIF Occurrence Download.
Aedes japonicus	Non-native	Europe	46.6508	14.5016	GBIF. 2026a. GBIF Occurrence Download.
Aedes japonicus	Non-native	Europe	48.6159	14.5056	GBIF. 2026a. GBIF Occurrence Download.
Aedes japonicus	Non-native	Europe	48.3111	14.5081	GBIF. 2026a. GBIF Occurrence Download.
Aedes japonicus	Non-native	Europe	48.1574	14.5131	GBIF. 2026a. GBIF Occurrence Download.
Aedes japonicus	Non-native	Europe	48.1907	14.5179	GBIF. 2026a. GBIF Occurrence Download.
Aedes japonicus	Non-native	Europe	48.3506	14.5293	GBIF. 2026a. GBIF Occurrence Download.
Aedes japonicus	Non-native	Europe	45.9591	14.5293	GBIF. 2026a. GBIF Occurrence Download.
Aedes japonicus	Non-native	Europe	47.5781	14.5484	GBIF. 2026a. GBIF Occurrence Download.
Aedes japonicus	Non-native	Europe	46.5805	14.5627	GBIF. 2026a. GBIF Occurrence Download.
Aedes japonicus	Non-native	Europe	46.0254	14.5663	GBIF. 2026a. GBIF Occurrence Download.
Aedes japonicus	Non-native	Europe	48.1023	14.5859	GBIF. 2026a. GBIF Occurrence Download.
Aedes japonicus	Non-native	Europe	46.6733	14.6047	GBIF. 2026a. GBIF Occurrence Download.
Aedes japonicus	Non-native	Europe	48.039	14.6187	GBIF. 2026a. GBIF Occurrence Download.
Aedes japonicus	Non-native	Europe	48.2469	14.645	GBIF. 2026a. GBIF Occurrence Download.
Aedes japonicus	Non-native	Europe	45.2336	14.6457	GBIF. 2026a. GBIF Occurrence Download.
Aedes japonicus	Non-native	Europe	48.302	14.6497	GBIF. 2026a. GBIF Occurrence Download.
Aedes japonicus	Non-native	Europe	47.1683	14.6581	GBIF. 2026a. GBIF Occurrence Download.
Aedes japonicus	Non-native	Europe	46.5573	14.7001	GBIF. 2026a. GBIF Occurrence Download.
Aedes japonicus	Non-native	Europe	45.7354	14.7358	GBIF. 2026a. GBIF Occurrence Download.
Aedes japonicus	Non-native	Europe	48.0715	14.7434	GBIF. 2026a. GBIF Occurrence Download.
Aedes japonicus	Non-native	Europe	47.4263	14.7543	GBIF. 2026a. GBIF Occurrence Download.
Aedes japonicus	Non-native	Europe	47.9614	14.7706	GBIF. 2026a. GBIF Occurrence Download.
Aedes japonicus	Non-native	Europe	47.801	14.7723	GBIF. 2026a. GBIF Occurrence Download.
Aedes japonicus	Non-native	Europe	48.4383	14.7844	GBIF. 2026a. GBIF Occurrence Download.
Aedes japonicus	Non-native	Europe	48.2128	14.789	GBIF. 2026a. GBIF Occurrence Download.
Aedes japonicus	Non-native	Europe	47.2246	14.796	GBIF. 2026a. GBIF Occurrence Download.
Aedes japonicus	Non-native	Europe	48.1011	14.7985	GBIF. 2026a. GBIF Occurrence Download.
Aedes japonicus	Non-native	Europe	48.2684	14.8082	GBIF. 2026a. GBIF Occurrence Download.
Aedes japonicus	Non-native	Europe	45.9415	14.8124	GBIF. 2026a. GBIF Occurrence Download.
Aedes japonicus	Non-native	Europe	46.8503	14.8214	GBIF. 2026a. GBIF Occurrence Download.
Aedes japonicus	Non-native	Europe	46.0541	14.8344	GBIF. 2026a. GBIF Occurrence Download.
Aedes japonicus	Non-native	Europe	47.149	14.8445	GBIF. 2026a. GBIF Occurrence Download.
Aedes japonicus	Non-native	Europe	48.2278	14.8501	GBIF. 2026a. GBIF Occurrence Download.
Aedes japonicus	Non-native	Europe	48.1247	14.8742	GBIF. 2026a. GBIF Occurrence Download.
Aedes japonicus	Non-native	Europe	46.7741	14.8876	GBIF. 2026a. GBIF Occurrence Download.
Aedes japonicus	Non-native	Europe	46.3445	14.9597	GBIF. 2026a. GBIF Occurrence Download.
Aedes japonicus	Non-native	Europe	46.0991	14.969	GBIF. 2026a. GBIF Occurrence Download.
Aedes japonicus	Non-native	Europe	47.4053	14.9923	GBIF. 2026a. GBIF Occurrence Download.
Aedes japonicus	Non-native	Europe	47.4392	15.0007	GBIF. 2026a. GBIF Occurrence Download.
Aedes japonicus	Non-native	Europe	47.2689	15.012	GBIF. 2026a. GBIF Occurrence Download.
Aedes japonicus	Non-native	Europe	46.5888	15.0175	GBIF. 2026a. GBIF Occurrence Download.
Aedes japonicus	Non-native	Europe	45.7076	15.0205	GBIF. 2026a. GBIF Occurrence Download.
Aedes japonicus	Non-native	Europe	46.1799	15.0445	GBIF. 2026a. GBIF Occurrence Download.
Aedes japonicus	Non-native	Europe	46.1498	15.0471	GBIF. 2026a. GBIF Occurrence Download.
Aedes japonicus	Non-native	Europe	46.5013	15.0726	GBIF. 2026a. GBIF Occurrence Download.
Aedes japonicus	Non-native	Europe	46.3668	15.0809	GBIF. 2026a. GBIF Occurrence Download.
Aedes japonicus	Non-native	Europe	46.5314	15.0882	GBIF. 2026a. GBIF Occurrence Download.
Aedes japonicus	Non-native	Europe	47.3744	15.0928	GBIF. 2026a. GBIF Occurrence Download.
Aedes japonicus	Non-native	Europe	48.2157	15.1328	GBIF. 2026a. GBIF Occurrence Download.
Aedes japonicus	Non-native	Europe	47.0813	15.1426	GBIF. 2026a. GBIF Occurrence Download.
Aedes japonicus	Non-native	Europe	48.3162	15.1507	GBIF. 2026a. GBIF Occurrence Download.
Aedes japonicus	Non-native	Europe	46.6096	15.1635	GBIF. 2026a. GBIF Occurrence Download.
Aedes japonicus	Non-native	Europe	45.813	15.1725	GBIF. 2026a. GBIF Occurrence Download.
Aedes japonicus	Non-native	Europe	46.4501	15.1838	GBIF. 2026a. GBIF Occurrence Download.
Aedes japonicus	Non-native	Europe	46.0656	15.1842	GBIF. 2026a. GBIF Occurrence Download.
Aedes japonicus	Non-native	Europe	46.27	15.1958	GBIF. 2026a. GBIF Occurrence Download.
Aedes japonicus	Non-native	Europe	46.817	15.2247	GBIF. 2026a. GBIF Occurrence Download.
Aedes japonicus	Non-native	Europe	48.2022	15.229	GBIF. 2026a. GBIF Occurrence Download.
Aedes japonicus	Non-native	Europe	46.1508	15.2332	GBIF. 2026a. GBIF Occurrence Download.
Aedes japonicus	Non-native	Europe	47.4796	15.2336	GBIF. 2026a. GBIF Occurrence Download.
Aedes japonicus	Non-native	Europe	46.8922	15.2594	GBIF. 2026a. GBIF Occurrence Download.
Aedes japonicus	Non-native	Europe	46.5337	15.2685	GBIF. 2026a. GBIF Occurrence Download.
Aedes japonicus	Non-native	Europe	47.4433	15.2792	GBIF. 2026a. GBIF Occurrence Download.
Aedes japonicus	Non-native	Europe	47.0342	15.3011	GBIF. 2026a. GBIF Occurrence Download.
Aedes japonicus	Non-native	Europe	46.0069	15.3084	GBIF. 2026a. GBIF Occurrence Download.
Aedes japonicus	Non-native	Europe	47.104	15.3119	GBIF. 2026a. GBIF Occurrence Download.
Aedes japonicus	Non-native	Europe	47.204	15.3194	GBIF. 2026a. GBIF Occurrence Download.
Aedes japonicus	Non-native	Europe	46.9381	15.3241	GBIF. 2026a. GBIF Occurrence Download.
Aedes japonicus	Non-native	Europe	47.1389	15.3301	GBIF. 2026a. GBIF Occurrence Download.
Aedes japonicus	Non-native	Europe	47.2687	15.3355	GBIF. 2026a. GBIF Occurrence Download.
Aedes japonicus	Non-native	Europe	46.9906	15.3499	GBIF. 2026a. GBIF Occurrence Download.
Aedes japonicus	Non-native	Europe	47.3264	15.3672	GBIF. 2026a. GBIF Occurrence Download.
Aedes japonicus	Non-native	Europe	47.1345	15.3737	GBIF. 2026a. GBIF Occurrence Download.
Aedes japonicus	Non-native	Europe	47.046	15.3825	GBIF. 2026a. GBIF Occurrence Download.
Aedes japonicus	Non-native	Europe	48.4183	15.3832	GBIF. 2026a. GBIF Occurrence Download.
Aedes japonicus	Non-native	Europe	47.0972	15.3842	GBIF. 2026a. GBIF Occurrence Download.
Aedes japonicus	Non-native	Europe	47.4881	15.3921	GBIF. 2026a. GBIF Occurrence Download.
Aedes japonicus	Non-native	Europe	47.16	15.4002	GBIF. 2026a. GBIF Occurrence Download.
Aedes japonicus	Non-native	Europe	46.9484	15.4008	GBIF. 2026a. GBIF Occurrence Download.
Aedes japonicus	Non-native	Europe	47.0725	15.4072	GBIF. 2026a. GBIF Occurrence Download.
Aedes japonicus	Non-native	Europe	44.6877	15.4109	GBIF. 2026a. GBIF Occurrence Download.
Aedes japonicus	Non-native	Europe	48.0252	15.4246	GBIF. 2026a. GBIF Occurrence Download.
Aedes japonicus	Non-native	Europe	47.0984	15.4271	GBIF. 2026a. GBIF Occurrence Download.
Aedes japonicus	Non-native	Europe	46.3336	15.4275	GBIF. 2026a. GBIF Occurrence Download.
Aedes japonicus	Non-native	Europe	47.0218	15.4288	GBIF. 2026a. GBIF Occurrence Download.
Aedes japonicus	Non-native	Europe	46.7856	15.4293	GBIF. 2026a. GBIF Occurrence Download.
Aedes japonicus	Non-native	Europe	46.9844	15.4316	GBIF. 2026a. GBIF Occurrence Download.
Aedes japonicus	Non-native	Europe	47.1267	15.4368	GBIF. 2026a. GBIF Occurrence Download.
Aedes japonicus	Non-native	Europe	45.9662	15.438	GBIF. 2026a. GBIF Occurrence Download.
Aedes japonicus	Non-native	Europe	47.049	15.4467	GBIF. 2026a. GBIF Occurrence Download.
Aedes japonicus	Non-native	Europe	47.0833	15.4614	GBIF. 2026a. GBIF Occurrence Download.
Aedes japonicus	Non-native	Europe	45.2869	15.4756	GBIF. 2026a. GBIF Occurrence Download.
Aedes japonicus	Non-native	Europe	47.5811	15.4841	GBIF. 2026a. GBIF Occurrence Download.
Aedes japonicus	Non-native	Europe	47.0051	15.4874	GBIF. 2026a. GBIF Occurrence Download.
Aedes japonicus	Non-native	Europe	47.0498	15.4896	GBIF. 2026a. GBIF Occurrence Download.
Aedes japonicus	Non-native	Europe	46.5512	15.4977	GBIF. 2026a. GBIF Occurrence Download.
Aedes japonicus	Non-native	Europe	47.4631	15.5074	GBIF. 2026a. GBIF Occurrence Download.
Aedes japonicus	Non-native	Europe	47.1301	15.5173	GBIF. 2026a. GBIF Occurrence Download.
Aedes japonicus	Non-native	Europe	46.2308	15.5185	GBIF. 2026a. GBIF Occurrence Download.
Aedes japonicus	Non-native	Europe	46.6551	15.5222	GBIF. 2026a. GBIF Occurrence Download.
Aedes japonicus	Non-native	Europe	46.7771	15.5569	GBIF. 2026a. GBIF Occurrence Download.
Aedes japonicus	Non-native	Europe	47.1438	15.5603	GBIF. 2026a. GBIF Occurrence Download.
Aedes japonicus	Non-native	Europe	47.0208	15.5613	GBIF. 2026a. GBIF Occurrence Download.
Aedes japonicus	Non-native	Europe	46.7182	15.5728	GBIF. 2026a. GBIF Occurrence Download.
Aedes japonicus	Non-native	Europe	47.1784	15.5729	GBIF. 2026a. GBIF Occurrence Download.
Aedes japonicus	Non-native	Europe	46.3171	15.5756	GBIF. 2026a. GBIF Occurrence Download.
Aedes japonicus	Non-native	Europe	46.3985	15.576	GBIF. 2026a. GBIF Occurrence Download.
Aedes japonicus	Non-native	Europe	46.9182	15.5773	GBIF. 2026a. GBIF Occurrence Download.
Aedes japonicus	Non-native	Europe	45.8999	15.5986	GBIF. 2026a. GBIF Occurrence Download.
Aedes japonicus	Non-native	Europe	46.1305	15.5995	GBIF. 2026a. GBIF Occurrence Download.
Aedes japonicus	Non-native	Europe	48.1532	15.6158	GBIF. 2026a. GBIF Occurrence Download.
Aedes japonicus	Non-native	Europe	48.409	15.6181	GBIF. 2026a. GBIF Occurrence Download.
Aedes japonicus	Non-native	Europe	48.2041	15.6197	GBIF. 2026a. GBIF Occurrence Download.
Aedes japonicus	Non-native	Europe	48.3688	15.6216	GBIF. 2026a. GBIF Occurrence Download.
Aedes japonicus	Non-native	Europe	46.8865	15.629	GBIF. 2026a. GBIF Occurrence Download.
Aedes japonicus	Non-native	Europe	47.2199	15.6396	GBIF. 2026a. GBIF Occurrence Download.
Aedes japonicus	Non-native	Europe	45.6716	15.6508	GBIF. 2026a. GBIF Occurrence Download.
Aedes japonicus	Non-native	Europe	46.0557	15.6628	GBIF. 2026a. GBIF Occurrence Download.
[truncated: 1,125 more rows]
