# Supplementary material for: Global niche dynamics of two invasive Aedes mosquitoes, Aedes japonicus and Aedes koreicus (Diptera: Culicidae), using comprehensive native and non-native occurrence data
Source: Research Square preprint supplement (doi:10.21203/rs.3.rs-9381631/v1), 2026-05-21
Supplement: Supplementary file 2 [file dcf4c27c089669bfb4288026.xlsx]

## Sheet: Sheet1
			PC1	PC2
variable	description	VIF	0.38168	0.18705
Bio2	mean diurnal range	2.204	-0.777	-0.08
Bio3	isothermality	3.316	-0.513	-0.639
Bio8	mean temperature of wettest quarter	2.358	-0.32	-0.31
Bio9	mean temperature of driest quarter	2.836	-0.321	-0.819
Bio14	precipitation of driest month	4.19	0.887	-0.231
Bio15	precipitation seasonality	2.279	-0.775	0.156
Bio18	precipitation of warmest quarter	1.91	0.498	0.099
Bio19	precipitation of coldest quarter	3.16	0.767	-0.36
Elevation	elevation	2.174	-0.372	0.534
